# Supplementary material for: Mammal faunal change in the zone of the Paleogene hyperthermals ETM2 and H2
Source: Copernicus journal article supplement (doi:10.5194/cp-11-1223-2015), 2015-09-24
Supplement: Supplementary file 1 [file Supplementary tables.xlsx]

## Sheet: S1
Table S1. Specimens of the Fifteenmile Creek (FC) sample used in the analysis of faunal response to ETM2 and H2
Institution	Catalog number	Locality	FC meter level	Order	Family	Genus	species	Number of Specimens	Left M1 length	Left M1 width	Right M1 length	Right M1 width	Description
USGS	3854	D-1311	442	Primates	Omomyidae	Absarokius	abbotti	1	0	0	0	0	rP4-M2
USGS	9191	D-1497	452	Primates	Omomyidae	Absarokius	abbotti	1	0	0	0	0	rm3
USGS	9192	D-1497	452	Primates	Omomyidae	Absarokius	abbotti	1	0	0	2.55	2.28	rm1-2
USGS	16450	D-1698	455	Primates	Omomyidae	Absarokius	abbotti	1	0	0	2.44	2.02	rp4-m2
USGS	26544	Y-227	457	Primates	Omomyidae	Absarokius	abbotti	1	0	0	0	0	rP4-M1
USGS	12204	D-1603	463	Primates	Omomyidae	Absarokius	abbotti	1	2.32	2.13	0	0	lp4-m2
USGS	12205	D-1603	463	Primates	Omomyidae	Absarokius	abbotti	1	2.32	2.26	0	0	lp4-m2
USGS	12206	D-1603	463	Primates	Omomyidae	Absarokius	abbotti	1	2.36	2.05	0	0	lp3-m3
USGS	12207	D-1603	463	Primates	Omomyidae	Absarokius	abbotti	1	2.48	2.29	0	0	lp4-m3
USGS	23907	D-1603	463	Primates	Omomyidae	Absarokius	abbotti	1	0	0	2.52	2.09	rm1-3
USGS	12228	D-1604	463	Primates	Omomyidae	Absarokius	abbotti	1	2.58	2.32	0	0	lp3-m2
USGS	12229	D-1604	463	Primates	Omomyidae	Absarokius	abbotti	1	0	0	0	0	rp4-m2, broken
USGS	12230	D-1604	463	Primates	Omomyidae	Absarokius	abbotti	1	0	0	0	0	lp4
USGS	16444	D-1699	463	Primates	Omomyidae	Absarokius	abbotti	1	2.59	2.27	0	0	lp3-m2
USGS	16446	D-1699	463	Primates	Omomyidae	Absarokius	abbotti	1	0	0	2.59	2.12	rp3-m2
USGS	16452	D-1699	463	Primates	Omomyidae	Absarokius	abbotti	1	2.52	2.52	0	0	lp4-m3
USGS	16457	D-1699	463	Primates	Omomyidae	Absarokius	abbotti	1	0	0	2.58	2.31	rp3-m2
USGS	26885	D-1833	463	Primates	Omomyidae	Absarokius	abbotti	1	0	0	0	0	rm2
USGS	27450	D-1833	463	Primates	Omomyidae	Absarokius	abbotti	1	2.23	2.22	0	0	lp4-m1
USGS	27454	D-1833	463	Primates	Omomyidae	Absarokius	abbotti	1	2.26	2.08	0	0	lm1-2
USGS	9162	D-1495	464	Primates	Omomyidae	Absarokius	abbotti	1	0	0	0	0	rm2-3
USGS	9163	D-1495	464	Primates	Omomyidae	Absarokius	abbotti	1	0	0	0	0	rP3-M3
USGS	9165	D-1495	464	Primates	Omomyidae	Absarokius	abbotti	1	0	0	0	0	lp3-m2, covered
USGS	9166	D-1495	464	Primates	Omomyidae	Absarokius	abbotti	1	0	0	2.57	2.15	rp4-m2
USGS	9167	D-1495	464	Primates	Omomyidae	Absarokius	abbotti	1	2.53	2.1	0	0	lp4-m1
USGS	27419	D-1737	466	Primates	Omomyidae	Absarokius	abbotti	1	0	0	2.59	2.34	rp3-m3
USGS	990	D-1162	481	Primates	Omomyidae	Absarokius	abbotti	1	0	0	0	0	rm2
USGS	991	D-1162	481	Primates	Omomyidae	Absarokius	abbotti	1	0	0	0	0	rM1-2
USGS	992	D-1162	481	Primates	Omomyidae	Absarokius	abbotti	1	0	0	0	0	lM1-2
USGS	3870	D-1162	481	Primates	Omomyidae	Absarokius	abbotti	1	0	0	0	0	rp4
USGS	3871	D-1162	481	Primates	Omomyidae	Absarokius	abbotti	1	2.36	2.11	0	0	lp4-m3
USGS	3872	D-1162	481	Primates	Omomyidae	Absarokius	abbotti	1	2.24	2.08	0	0	lp4-m3
USGS	9177	D-1162	481	Primates	Omomyidae	Absarokius	abbotti	1	0	0	2.38	2.09	rp3-m1
USGS	503	D-1229	481	Primates	Omomyidae	Absarokius	abbotti	1	2.52	2.16	0	0	lp3-m1
USGS	5981	D-1229	481	Primates	Omomyidae	Absarokius	abbotti	1	2.41	2.26	0	0	lp3-m3
USGS	9161	D-1510	482	Primates	Omomyidae	Absarokius	abbotti	1	0	0	0	0	rm2-3
USGS	9173	D-1510	482	Primates	Omomyidae	Absarokius	abbotti	1	0	0	2.67	2.17	rm1-3
NMNH	511114	D-1510	482	Primates	Omomyidae	Absarokius	abbotti	1	0	0	0	0	lP3-M3
USGS	27840	D-1994	482	Primates	Omomyidae	Absarokius	abbotti	1	2.29	2.11	0	0	lm1-2
NMNH	488351	RB-12	482	Primates	Omomyidae	Absarokius	abbotti	1	0	0	0	0	rm1-2, covered
NMNH	511117	RB-12	482	Primates	Omomyidae	Absarokius	abbotti	1	0	0	0	0	lP3-M2
USGS	322	D-1230	490	Primates	Omomyidae	Absarokius	abbotti	1	0	0	2.42	2.3	rm1-3
USGS	475	D-1230	490	Primates	Omomyidae	Absarokius	abbotti	1	0	0	0	0	rP4-M3
USGS	485	D-1230	490	Primates	Omomyidae	Absarokius	abbotti	1	0	0	0	0	lP3-M3
USGS	5968	D-1230	490	Primates	Omomyidae	Absarokius	abbotti	1	0	0	2.57	2.12	rm1-3
USGS	5969	D-1230	490	Primates	Omomyidae	Absarokius	abbotti	1	0	0	0	0	lm2-3
NMNH	509611	D-1230	490	Primates	Omomyidae	Absarokius	abbotti	1	2.39	2.16	0	0	lp4-m3
USGS	1826	D-1163	491	Primates	Omomyidae	Absarokius	abbotti	1	2.45	2.12	0	0	lp4-m2
USGS	1827	D-1163	491	Primates	Omomyidae	Absarokius	abbotti	1	2.46	1.99	0	0	lp3, lm1-2
USGS	3885	D-1338	491	Primates	Omomyidae	Absarokius	abbotti	1	0	0	0	0	lP3-M3
USGS	3886	D-1338	491	Primates	Omomyidae	Absarokius	abbotti	1	2.39	2.14	0	0	lp4-m1
USGS	3887	D-1338	491	Primates	Omomyidae	Absarokius	abbotti	1	0	0	2.34	2.07	rp3-m3
USGS	3888	D-1338	491	Primates	Omomyidae	Absarokius	abbotti	1	2.36	2.06	0	0	lp4-m3
USGS	3889	D-1338	491	Primates	Omomyidae	Absarokius	abbotti	1	0	0	0	0	rP4-M3
USGS	3890	D-1338	491	Primates	Omomyidae	Absarokius	abbotti	1	0	0	0	0	lm2
USGS	3850	D-1345	491	Primates	Omomyidae	Absarokius	abbotti	1	0	0	0	0	rP3-M3
USGS	3851	D-1345	491	Primates	Omomyidae	Absarokius	abbotti	1	0	0	0	0	lm2
USGS	8933	D-1345	491	Primates	Omomyidae	Absarokius	abbotti	1	0	0	2.36	2.12	rm1-3
USGS	6629	D-1346	491	Primates	Omomyidae	Absarokius	abbotti	1	0	0	0	0	rP3-M3
USGS	8682	D-1469	491	Primates	Omomyidae	Absarokius	abbotti	1	0	0	2.47	2.11	rp3-m2
USGS	21682	D-1773	491	Primates	Omomyidae	Absarokius	abbotti	1	0	0	2.53	2.11	rm1-3
USGS	1598	Y-28	491	Primates	Omomyidae	Absarokius	abbotti	1	0	0	0	0	rp3-m3
USGS	27447	Y-28	491	Primates	Omomyidae	Absarokius	abbotti	1	2.47	1.94	0	0	lp4-m1, m3
USGS	5956	D-1436	492	Primates	Omomyidae	Absarokius	abbotti	1	2.59	2.21	0	0	lp3-m2
USGS	5957	D-1436	492	Primates	Omomyidae	Absarokius	abbotti	1	2.42	2.24	0	0	lp4-m2
USGS	5964	D-1436	492	Primates	Omomyidae	Absarokius	abbotti	1	0	0	0	0	lp3-4, lm2
USGS	8030	D-1436	492	Primates	Omomyidae	Absarokius	abbotti	1	0	0	0	0	rP3-M3, covered
NMNH	511111	D-1436	492	Primates	Omomyidae	Absarokius	abbotti	1	2.58	1.96	0	0	lp4-m2
NMNH	511187	D-1436	492	Primates	Omomyidae	Absarokius	abbotti	1	2.51	2.14	0	0	lp3-m3
USGS	27834	D-1992	492	Primates	Omomyidae	Absarokius	abbotti	1	2.37	2.17	0	0	lp4-m2
USGS	9149	D-1507	494	Primates	Omomyidae	Absarokius	abbotti	1	0	0	2.46	2.12	rp4-m3, r and lM1-2
USGS	9200	D-1507	494	Primates	Omomyidae	Absarokius	abbotti	1	0	0	0	0	rP3-4
USGS	9145	D-1508	494	Primates	Omomyidae	Absarokius	abbotti	1	2.4	2.14	0	0	lm1-2
USGS	7698	D-1474	496	Primates	Omomyidae	Absarokius	abbotti	1	0	0	2.53	2.13	rm1-3
USGS	7701	D-1474	496	Primates	Omomyidae	Absarokius	abbotti	1	0	0	0	0	rM1-3
USGS	7702	D-1474	496	Primates	Omomyidae	Absarokius	abbotti	1	0	0	0	0	rm2-3
USGS	9697	D-1474	496	Primates	Omomyidae	Absarokius	abbotti	1	0	0	0	0	rm2-3
USGS	24053	D-1782	496	Primates	Omomyidae	Absarokius	abbotti	1	0	0	0	0	rP2-M3
NMNH	488352	D-1782	496	Primates	Omomyidae	Absarokius	abbotti	1	0	0	2.31	2.08	rp4-m3
NMNH	490621	D-1782	496	Primates	Omomyidae	Absarokius	abbotti	1	0	0	2.7	2.18	rp4-m2
USGS	3852	D-1337	499	Primates	Omomyidae	Absarokius	abbotti	1	0	0	2.66	2.32	rm1-2
NMNH	521578	D-1174	501	Primates	Omomyidae	Absarokius	abbotti	1	0	0	0	0	lm2-3
NMNH	521579	D-1174	501	Primates	Omomyidae	Absarokius	abbotti	1	0	0	2.4	1.95	rm1-3
USGS	1798	D-1175	501	Primates	Omomyidae	Absarokius	abbotti	1	0	0	0	0	rM1-3
USGS	5958	D-1175	501	Primates	Omomyidae	Absarokius	abbotti	1	2.45	2.13	0	0	lm1-2
USGS	5945	D-1431	501	Primates	Omomyidae	Absarokius	abbotti	1	0	0	2.56	2.06	rp4-m3
USGS	8305	D-1468	501	Primates	Omomyidae	Absarokius	abbotti	1	0	0	2.39	2.08	rp4-m3
USGS	26559	D-1830	501	Primates	Omomyidae	Absarokius	abbotti	1	0	0	2.47	2.2	rp3-m3
NMNH	521576	WW-54	501	Primates	Omomyidae	Absarokius	abbotti	1	0	0	0	0	lp3-m3, covered
USGS	5947	Y-25	501	Primates	Omomyidae	Absarokius	abbotti	1	0	0	2.49	2.17	rp4-m3
USGS	5944	Y-39	501	Primates	Omomyidae	Absarokius	abbotti	1	0	0	2.62	2.1	rp4-m3
USGS	8634	Y-39	501	Primates	Omomyidae	Absarokius	abbotti	1	2.54	1.91	0	0	lp4-m1
NMNH	495485	D-1341	384	Primates	Notharctidae	Cantius	abditus	1	4.85	3.85	0	0	lp4-m3, RM1-3
NMNH	495489	D-1341	384	Primates	Notharctidae	Cantius	abditus	1	5.08	4.08	5.13	3.68	lp4-m3, rm1, M
USGS	4603	D-1385	392	Primates	Notharctidae	Cantius	abditus	1	0	0	5.08	4.08	rm1-3
USGS	8478	D-1413	392	Primates	Notharctidae	Cantius	abditus	1	0	0	0	0	lm2
USGS	28010	Y-460	392	Primates	Notharctidae	Cantius	abditus	1	4.81	3.75	0	0	lm1-2
USGS	28011	Y-460	392	Primates	Notharctidae	Cantius	abditus	1	0	0	0	0	rM2-3
NMNH	527530	Y-460	392	Primates	Notharctidae	Cantius	abditus	1					L distal humerus
USGS	25858	D-1759	393	Primates	Notharctidae	Cantius	abditus	1	0	0	0	0	lm3
USGS	10086	D-1556	397	Primates	Notharctidae	Cantius	abditus	2	0	0	0	0	2 rm3
USGS	10087	D-1556	397	Primates	Notharctidae	Cantius	abditus	1	0	0	0	0	lm2-3
NMNH	511287	D-1556	397	Primates	Notharctidae	Cantius	abditus	1	0	0	0	0	rm3
NMNH	511289	D-1556	397	Primates	Notharctidae	Cantius	abditus	1	0	0	4.72	3.97	rp4-m2
USGS	453	D-1222	400	Primates	Notharctidae	Cantius	abditus	1	0	0	0	0	rM1-3
USGS	455	D-1222	400	Primates	Notharctidae	Cantius	abditus	3	0	0	4.69	3.79	rm1, r and lm3
USGS	9093	D-1222	400	Primates	Notharctidae	Cantius	abditus	1	0	0	4.6	3.66	rm1-2
USGS	9094	D-1222	400	Primates	Notharctidae	Cantius	abditus	1	0	0	0	0	rm3
USGS	8704	D-1458	400	Primates	Notharctidae	Cantius	abditus	1	0	0	0	0	lm2
NMNH	uncatalogued	D-1952	400	Primates	Notharctidae	Cantius	abditus	1	4.68	3.82			lp3-m1
USGS	10479	Y-324	400	Primates	Notharctidae	Cantius	abditus	1	0	0	4.86	4.04	rp4-m3
USGS	30025	Y-324	400	Primates	Notharctidae	Cantius	abditus	1	0	0	0	0	rp4-m3, bones
USGS	30142	Y-324	400	Primates	Notharctidae	Cantius	abditus	1	0	0	0	0	rm2-3
USGS	30294	Y-324	400	Primates	Notharctidae	Cantius	abditus	2	0	0	0	0	misc teeth
USGS	27185-duplicate	Y-324	400	Primates	Notharctidae	Cantius	abditus	1	4.9	3.84	0	0	lp3-m3, rm2-3, assoc uppers
USGS	25332	D-1951	402	Primates	Notharctidae	Cantius	abditus	1	0	0	0	0	skull
USGS	27215	D-1951	402	Primates	Notharctidae	Cantius	abditus	1	0	0	0	0	lM1-3
USGS	27216	D-1951	402	Primates	Notharctidae	Cantius	abditus	1	0	0	0	0	lM1-3
USGS	27217	D-1951	402	Primates	Notharctidae	Cantius	abditus	1	4.74	3.73	0	0	r and lp3-m3, broken, lM1-2
USGS	27220	D-1951	402	Primates	Notharctidae	Cantius	abditus	1	0	0	0	0	rP4-M3
USGS	27624	D-1951	402	Primates	Notharctidae	Cantius	abditus	1	0	0	0	0	lm2
USGS	27649	D-1951	402	Primates	Notharctidae	Cantius	abditus	1	0	0	4.89	3.68	rp4-m3
USGS	27655	D-1951	402	Primates	Notharctidae	Cantius	abditus	1	0	0	5.2	4.29	rp4-m3
USGS	27656	D-1951	402	Primates	Notharctidae	Cantius	abditus	1	0	0	0	0	rm2-3
USGS	27658	D-1951	402	Primates	Notharctidae	Cantius	abditus	1	0	0	0	0	rm2-3
USGS	27659	D-1951	402	Primates	Notharctidae	Cantius	abditus	1	0	0	0	0	rm2
USGS	27660	D-1951	402	Primates	Notharctidae	Cantius	abditus	1	0	0	0	0	lm2
USGS	28044	D-1951	402	Primates	Notharctidae	Cantius	abditus	1	4.94	3.76	0	0	lm1-2
USGS	28045	D-1951	402	Primates	Notharctidae	Cantius	abditus	1	0	0	0	0	rm2-3
USGS	28046	D-1951	402	Primates	Notharctidae	Cantius	abditus	1	0	0	4.52	3.72	rp4-m2
USGS	28048	D-1951	402	Primates	Notharctidae	Cantius	abditus	1	0	0	4.79	3.83	rp4-m1
USGS	28049	D-1951	402	Primates	Notharctidae	Cantius	abditus	1	0	0	4.98	3.84	rm1-2
USGS	28053	D-1951	402	Primates	Notharctidae	Cantius	abditus	1	4.91	3.62	0	0	lm1-2
USGS	28055	D-1951	402	Primates	Notharctidae	Cantius	abditus	1	0	0	0	0	lm2
USGS	28056	D-1951	402	Primates	Notharctidae	Cantius	abditus	1	0	0	0	0	rM2
USGS	28078	D-1951	402	Primates	Notharctidae	Cantius	abditus	2	0	0	0	0	lm2, lm3
USGS	30123	D-1951	402	Primates	Notharctidae	Cantius	abditus	1	4.76	3.92	0	0	lp4-m3, lP3-M3
USGS	30143	D-1951	402	Primates	Notharctidae	Cantius	abditus	1	0	0	4.9	4.03	rp4-m2, lP3-4
NMNH	uncatalogued	D-1951	402	Primates	Notharctidae	Cantius	abditus	2	4.77	3.95			lm1, rm2
NMNH	uncatalogued	D-1951	402	Primates	Notharctidae	Cantius	abditus	1			4.33	4.01	rp4-m1
USGS	9953	D-1538	405	Primates	Notharctidae	Cantius	abditus	1	0	0	4.69	3.85	rm1-2
USGS	9954	D-1538	405	Primates	Notharctidae	Cantius	abditus	1	4.84	3.77	0	0	lm1-2
USGS	9956	D-1538	405	Primates	Notharctidae	Cantius	abditus	1	0	0	0	0	lm2-3
USGS	13621	D-1538	405	Primates	Notharctidae	Cantius	abditus	1	0	0	0	0	lM1-3
NMNH	487940	D-1538	405	Primates	Notharctidae	Cantius	abditus	1	4.89	3.95	0	0	lp3-m2
USGS	9893	D-1559	405	Primates	Notharctidae	Cantius	abditus	1	0	0	0	0	rm3
USGS	9894	D-1559	405	Primates	Notharctidae	Cantius	abditus	1	4.86	3.69	0	0	lp4-m1
USGS	9895	D-1559	405	Primates	Notharctidae	Cantius	abditus	1	0	0	0	0	rm2-3
USGS	9896	D-1559	405	Primates	Notharctidae	Cantius	abditus	1	0	0	0	0	lP4-M1
NMNH	495167	Y-230A	407	Primates	Notharctidae	Cantius	abditus	1	0	0	0	0	rP3-M3
NMNH	uncatalogued	Y-230A	407	Primates	Notharctidae	Cantius	abditus	1	4.34	3.91			lp3-m3 assoc
NMNH	uncatalogued	Y-230A	407	Primates	Notharctidae	Cantius	abditus	2					lM1-2, rMx
USGS	4489	D-1350	409	Primates	Notharctidae	Cantius	abditus	1	4.84	3.79	4.62	3.83	lm1-3, rm1-2
USGS	13573	D-1350	409	Primates	Notharctidae	Cantius	abditus	1	0	0	0	0	lm3
USGS	13574	D-1350	409	Primates	Notharctidae	Cantius	abditus	1	4.85	3.88	0	0	lm1-2
USGS	13575	D-1350	409	Primates	Notharctidae	Cantius	abditus	1	0	0	0	0	rp3-4
USGS	13612	D-1350	409	Primates	Notharctidae	Cantius	abditus	1	0	0	0	0	lM1-2
USGS	13618	D-1350	409	Primates	Notharctidae	Cantius	abditus	1	4.94	3.85	0	0	lm1-3
USGS	13619	D-1350	409	Primates	Notharctidae	Cantius	abditus	1	0	0	0	0	rm3
USGS	13731	D-1350	409	Primates	Notharctidae	Cantius	abditus	1	0	0	0	0	lm2-3
USGS	23239	D-1350	409	Primates	Notharctidae	Cantius	abditus	1	0	0	0	0	lP3-M3
NMNH	511205	D-1350	409	Primates	Notharctidae	Cantius	abditus	1	0	0	0	0	rp3-m2
USGS	7401	D-1454	409	Primates	Notharctidae	Cantius	abditus	1	0	0	4.92	3.65	rp4-m3
USGS	7402	D-1454	409	Primates	Notharctidae	Cantius	abditus	1	0	0	0	0	lp4, lm2-3
USGS	7405	D-1454	409	Primates	Notharctidae	Cantius	abditus	1	0	0	4.72	3.63	rp4-m2
USGS	7406	D-1454	409	Primates	Notharctidae	Cantius	abditus	2	0	0	0	0	r and lm3
USGS	7423	D-1454	409	Primates	Notharctidae	Cantius	abditus	1	0	0	0	0	rm2-3
USGS	7424	D-1454	409	Primates	Notharctidae	Cantius	abditus	1	0	0	0	0	lm2-3
USGS	7425	D-1454	409	Primates	Notharctidae	Cantius	abditus	1	0	0	0	0	lp3-4
USGS	7426	D-1454	409	Primates	Notharctidae	Cantius	abditus	1	0	0	0	0	lP2-3
USGS	7427	D-1454	409	Primates	Notharctidae	Cantius	abditus	1	0	0	4.51	3.74	rp4-m2
USGS	7429	D-1454	409	Primates	Notharctidae	Cantius	abditus	1	0	0	0	0	rP4-M1
USGS	7431	D-1454	409	Primates	Notharctidae	Cantius	abditus	1	0	0	4.65	3.88	rp4-m2
USGS	7432	D-1454	409	Primates	Notharctidae	Cantius	abditus	1	4.8	3.77	0	0	lm1-3
USGS	7434	D-1454	409	Primates	Notharctidae	Cantius	abditus	1	4.62	4.11	0	0	lm1-3
USGS	7435	D-1454	409	Primates	Notharctidae	Cantius	abditus	1	0	0	0	0	lm2-3
USGS	7436	D-1454	409	Primates	Notharctidae	Cantius	abditus	1	0	0	0	0	lp3-4
USGS	7437	D-1454	409	Primates	Notharctidae	Cantius	abditus	1	0	0	4.51	3.75	rp4-m2
USGS	7438	D-1454	409	Primates	Notharctidae	Cantius	abditus	1	4.79	3.67	0	0	lm1-2
USGS	7439	D-1454	409	Primates	Notharctidae	Cantius	abditus	1	0	0	0	0	lM2-3
USGS	7440	D-1454	409	Primates	Notharctidae	Cantius	abditus	1	0	0	0	0	lm2-3
USGS	7441	D-1454	409	Primates	Notharctidae	Cantius	abditus	1	4.43	3.42	0	0	lm1-3
USGS	7442	D-1454	409	Primates	Notharctidae	Cantius	abditus	1	0	0	0	0	rm2-3
USGS	7443	D-1454	409	Primates	Notharctidae	Cantius	abditus	1	0	0	0	0	lp3-4
USGS	7445	D-1454	409	Primates	Notharctidae	Cantius	abditus	1	0	0	0	0	rM1-3
USGS	7447	D-1454	409	Primates	Notharctidae	Cantius	abditus	1	0	0	0	0	lm2-3
USGS	7448	D-1454	409	Primates	Notharctidae	Cantius	abditus	1	0	0	0	0	rM1-2
USGS	7449	D-1454	409	Primates	Notharctidae	Cantius	abditus	1	0	0	0	0	lm2-3
USGS	7451	D-1454	409	Primates	Notharctidae	Cantius	abditus	1	0	0	0	0	rm2-3
USGS	7452	D-1454	409	Primates	Notharctidae	Cantius	abditus	1	0	0	0	0	lp3-4
USGS	7453	D-1454	409	Primates	Notharctidae	Cantius	abditus	1	4.8	3.8	0	0	lp4-m1
USGS	7459	D-1454	409	Primates	Notharctidae	Cantius	abditus	1	0	0	4.61	3.86	rm1-2
USGS	7623	D-1454	409	Primates	Notharctidae	Cantius	abditus	2	0	0	0	0	jaw frags
USGS	9951	D-1454	409	Primates	Notharctidae	Cantius	abditus	1	0	0	0	0	lM1-3
USGS	18363	D-1454	409	Primates	Notharctidae	Cantius	abditus	1	0	0	0	0	lM1-3
USGS	18364	D-1454	409	Primates	Notharctidae	Cantius	abditus	1	0	0	0	0	rm2
USGS	18365	D-1454	409	Primates	Notharctidae	Cantius	abditus	2	0	0	0	0	jaw frags
USGS	18367	D-1454	409	Primates	Notharctidae	Cantius	abditus	1	0	0	0	0	lm2-3
USGS	18368	D-1454	409	Primates	Notharctidae	Cantius	abditus	1	0	0	0	0	rm2-3
USGS	23749	D-1454	409	Primates	Notharctidae	Cantius	abditus	1	0	0	0	0	lp4-m3, broken
USGS	23750	D-1454	409	Primates	Notharctidae	Cantius	abditus	1	0	0	4.7	3.5	rp3-m3
USGS	27185	D-1454	409	Primates	Notharctidae	Cantius	abditus	1	0	0	0	0	tooth and bone mash
USGS	27213	D-1454	409	Primates	Notharctidae	Cantius	abditus	1	0	0	0	0	lM1-2
USGS	27214	D-1454	409	Primates	Notharctidae	Cantius	abditus	1	0	0	0	0	rM1-3
USGS	27222	D-1454	409	Primates	Notharctidae	Cantius	abditus	1	0	0	0	0	rP4-M3
USGS	27223	D-1454	409	Primates	Notharctidae	Cantius	abditus	1	0	0	0	0	lM1-3
USGS	27610	D-1454	409	Primates	Notharctidae	Cantius	abditus	1	0	0	0	0	rm2
USGS	27611	D-1454	409	Primates	Notharctidae	Cantius	abditus	1	0	0	0	0	lm2-3
USGS	27614	D-1454	409	Primates	Notharctidae	Cantius	abditus	1	0	0	0	0	lm2
USGS	27616	D-1454	409	Primates	Notharctidae	Cantius	abditus	1	4.51	3.96	0	0	lm1-2
USGS	27617	D-1454	409	Primates	Notharctidae	Cantius	abditus	1	5	3.99	0	0	lm1
USGS	27618	D-1454	409	Primates	Notharctidae	Cantius	abditus	1	0	0	0	0	rm3
USGS	27619	D-1454	409	Primates	Notharctidae	Cantius	abditus	1	0	0	0	0	lm2
USGS	27620	D-1454	409	Primates	Notharctidae	Cantius	abditus	1	4.87	4.02	4.75	4	lp3-m3, rm1-3
USGS	27661	D-1454	409	Primates	Notharctidae	Cantius	abditus	1	0	0	4.58	3.91	rp2-m3
USGS	27664	D-1454	409	Primates	Notharctidae	Cantius	abditus	1	0	0	0	0	lp3-m2, broken
USGS	27665	D-1454	409	Primates	Notharctidae	Cantius	abditus	1	4.9	3.87	0	0	lm1-3
USGS	27667	D-1454	409	Primates	Notharctidae	Cantius	abditus	1	0	0	4.71	3.75	rm1-2
USGS	27669	D-1454	409	Primates	Notharctidae	Cantius	abditus	1	0	0	0	0	rp1-4
USGS	27670	D-1454	409	Primates	Notharctidae	Cantius	abditus	1	4.89	3.79	0	0	lm1-2
USGS	27671	D-1454	409	Primates	Notharctidae	Cantius	abditus	1	5.09	4.01	0	0	lp4-m1
USGS	27672	D-1454	409	Primates	Notharctidae	Cantius	abditus	1	0	0	0	0	M
USGS	27673	D-1454	409	Primates	Notharctidae	Cantius	abditus	6	0	0	0	0	misc m
USGS	27674	D-1454	409	Primates	Notharctidae	Cantius	abditus	1	0	0	0	0	rm2-3
USGS	27708	D-1454	409	Primates	Notharctidae	Cantius	abditus	1	0	0	0	0	lm2
USGS	27709	D-1454	409	Primates	Notharctidae	Cantius	abditus	1	0	0	0	0	rm2-3
USGS	27714	D-1454	409	Primates	Notharctidae	Cantius	abditus	1	0	0	4.81	3.86	rm1-3
USGS	27722	D-1454	409	Primates	Notharctidae	Cantius	abditus	1	5	3.82	0	0	lm1-3
USGS	27724	D-1454	409	Primates	Notharctidae	Cantius	abditus	1	0	0	0	0	lM1-3
USGS	27725	D-1454	409	Primates	Notharctidae	Cantius	abditus	1	0	0	0	0	rM1-2
USGS	27728	D-1454	409	Primates	Notharctidae	Cantius	abditus	1	0	0	0	0	rM1-3
USGS	27730	D-1454	409	Primates	Notharctidae	Cantius	abditus	1	0	0	0	0	rM1-3
USGS	27731	D-1454	409	Primates	Notharctidae	Cantius	abditus	1	0	0	4.74	4.08	rm1-2
USGS	27732	D-1454	409	Primates	Notharctidae	Cantius	abditus	1	0	0	0	0	rm2-3
USGS	27734	D-1454	409	Primates	Notharctidae	Cantius	abditus	9	0	0	0	0	misc teeth
USGS	27743	D-1454	409	Primates	Notharctidae	Cantius	abditus	1	0	0	4.72	3.58	rp4-m1
USGS	28086	D-1454	409	Primates	Notharctidae	Cantius	abditus	1	0	0	0	0	lM1
USGS	29633	D-1454	409	Primates	Notharctidae	Cantius	abditus	7	0	0	0	0	misc m
USGS	30216	D-1454	409	Primates	Notharctidae	Cantius	abditus	1	4.81	3.62	0	0	lp4-m3
USGS	38032	D-1454	409	Primates	Notharctidae	Cantius	abditus	1	0	0	0	0	rP3-4
USGS	38037	D-1454	409	Primates	Notharctidae	Cantius	abditus	1	0	0	0	0	lP2-M3
NMNH	541927	D-1454	409	Primates	Notharctidae	Cantius	abditus	1					R distal calcaneus
NMNH	uncatalogued	D-1454	409	Primates	Notharctidae	Cantius	abditus	11	4.93	3.78	4.67	3.9	lm1-2, rp3-m2, misc jaws
USGS	7737	D-1460	409	Primates	Notharctidae	Cantius	abditus	1	4.8	3.85	4.78	3.77	lm1-3, ri2-m1
USGS	7738	D-1460	409	Primates	Notharctidae	Cantius	abditus	1	0	0	0	0	lp2-m3, rp4-m3
USGS	7739	D-1460	409	Primates	Notharctidae	Cantius	abditus	1	0	0	4.7	3.68	rm1-2
USGS	7741	D-1460	409	Primates	Notharctidae	Cantius	abditus	1	0	0	0	0	lm1-3, broken
USGS	7742	D-1460	409	Primates	Notharctidae	Cantius	abditus	1	0	0	4.84	3.76	rm1-3
USGS	7743	D-1460	409	Primates	Notharctidae	Cantius	abditus	1	0	0	0	0	rm1-2, broken
USGS	7744	D-1460	409	Primates	Notharctidae	Cantius	abditus	1	0	0	0	0	lP3-4
USGS	7745	D-1460	409	Primates	Notharctidae	Cantius	abditus	1	0	0	0	0	rp4-m3, shattered
USGS	7747	D-1460	409	Primates	Notharctidae	Cantius	abditus	1	0	0	5	4.35	rp3-m1
USGS	7749	D-1460	409	Primates	Notharctidae	Cantius	abditus	1	0	0	0	0	lm2-3
USGS	7750	D-1460	409	Primates	Notharctidae	Cantius	abditus	1	0	0	0	0	rm2-3
USGS	7751	D-1460	409	Primates	Notharctidae	Cantius	abditus	3	0	0	0	0	misc teeth
USGS	9248	D-1460	409	Primates	Notharctidae	Cantius	abditus	1	0	0	0	0	rM1-3
USGS	9249	D-1460	409	Primates	Notharctidae	Cantius	abditus	1	0	0	0	0	rM2-3
USGS	9250	D-1460	409	Primates	Notharctidae	Cantius	abditus	1	0	0	0	0	lm2-3
USGS	9251	D-1460	409	Primates	Notharctidae	Cantius	abditus	1	0	0	4.81	3.65	rm1-3
USGS	9252	D-1460	409	Primates	Notharctidae	Cantius	abditus	1	0	0	5	4.02	rp4-m1
USGS	9253	D-1460	409	Primates	Notharctidae	Cantius	abditus	1	0	0	0	0	lm2
USGS	9254	D-1460	409	Primates	Notharctidae	Cantius	abditus	1	0	0	0	0	lM1-2
USGS	9255	D-1460	409	Primates	Notharctidae	Cantius	abditus	1	0	0	0	0	M
USGS	9256	D-1460	409	Primates	Notharctidae	Cantius	abditus	2	0	0	0	0	jaw frags
USGS	10448	D-1460	409	Primates	Notharctidae	Cantius	abditus	1	4.83	4.09	0	0	lm1-3
USGS	30026	D-1460	409	Primates	Notharctidae	Cantius	abditus	1	4.71	3.93	4.71	3.95	l and rp3-m3
USGS	30145	D-1460	409	Primates	Notharctidae	Cantius	abditus	1	0	0	0	0	rM1
USGS	30186	D-1460	409	Primates	Notharctidae	Cantius	abditus	1	0	0	0	0	rm1-2, broken
USGS	30187	D-1460	409	Primates	Notharctidae	Cantius	abditus	1	0	0	5.09	3.87	rm1-2
USGS	30188	D-1460	409	Primates	Notharctidae	Cantius	abditus	1	0	0	5.01	3.98	rm1-2
USGS	30190	D-1460	409	Primates	Notharctidae	Cantius	abditus	1	0	0	0	0	lm2-3
USGS	30191	D-1460	409	Primates	Notharctidae	Cantius	abditus	1	0	0	0	0	r jaw frag, covered
USGS	30192	D-1460	409	Primates	Notharctidae	Cantius	abditus	1	0	0	0	0	rm1-2, broken
USGS	30193	D-1460	409	Primates	Notharctidae	Cantius	abditus	1	4.82	3.91	0	0	lp4-m1
USGS	30194	D-1460	409	Primates	Notharctidae	Cantius	abditus	1	0	0	0	0	lm2-3
USGS	30195	D-1460	409	Primates	Notharctidae	Cantius	abditus	1	0	0	0	0	rM2
USGS	30197	D-1460	409	Primates	Notharctidae	Cantius	abditus	7	0	0	0	0	misc tooth frags
USGS	30198	D-1460	409	Primates	Notharctidae	Cantius	abditus	1	0	0	0	0	rm2
USGS	30199	D-1460	409	Primates	Notharctidae	Cantius	abditus	1	4.76	3.97	0	0	lm1
USGS	30200	D-1460	409	Primates	Notharctidae	Cantius	abditus	1	0	0	0	0	rm2
USGS	30201	D-1460	409	Primates	Notharctidae	Cantius	abditus	1	0	0	0	0	rm2
USGS	30203	D-1460	409	Primates	Notharctidae	Cantius	abditus	1	4.79	3.52	0	0	rm1
USGS	38002	D-1460	409	Primates	Notharctidae	Cantius	abditus	1	0	0	4.91	3.72	rm1
USGS	7318	D-1527	410	Primates	Notharctidae	Cantius	abditus	1	0	0	4.63	3.99	rp4-m2
USGS	9777	D-1527	410	Primates	Notharctidae	Cantius	abditus	1	4.73	3.81	0	0	lp4-m2
USGS	9926	D-1549	410	Primates	Notharctidae	Cantius	abditus	1	0	0	0	0	lp2-4
USGS	9927	D-1549	410	Primates	Notharctidae	Cantius	abditus	2	0	0	0	0	misc teeth
USGS	9928	D-1549	410	Primates	Notharctidae	Cantius	abditus	1	0	0	4.95	3.68	rp3-m1
USGS	9929	D-1549	410	Primates	Notharctidae	Cantius	abditus	1	0	0	0	0	lm2-3
USGS	9930	D-1549	410	Primates	Notharctidae	Cantius	abditus	1	4.77	3.66	0	0	lp4-m1
USGS	38455	D-1549	410	Primates	Notharctidae	Cantius	abditus	1	0	0	0	0	lp3
USGS	38457	D-1549	410	Primates	Notharctidae	Cantius	abditus	1	0	0	0	0	rm2
USGS	27184	D-1859	410	Primates	Notharctidae	Cantius	abditus	1	0	0	0	0	lp4
USGS	13562	Y-463	410	Primates	Notharctidae	Cantius	abditus	1	4.69	3.72	0	0	lp4-m1
NMNH	522193	D-1804	411	Primates	Notharctidae	Cantius	abditus	2	0	0	0	0	rp4, lm1
USGS	23707	D-1217	412	Primates	Notharctidae	Cantius	abditus	1	0	0	0	0	rp4
USGS	23731	D-1217	412	Primates	Notharctidae	Cantius	abditus	1	0	0	0	0	rm3
USGS	25878	D-1411	412	Primates	Notharctidae	Cantius	abditus	1	0	0	0	0	rm2-3
USGS	25938	D-1411	412	Primates	Notharctidae	Cantius	abditus	1	0	0	4.76	3.75	rp4-m2
USGS	25940	D-1411	412	Primates	Notharctidae	Cantius	abditus	1	0	0	0	0	rm2-3
USGS	25942	D-1411	412	Primates	Notharctidae	Cantius	abditus	1	0	0	0	0	lp4-m1, broken
USGS	25943	D-1411	412	Primates	Notharctidae	Cantius	abditus	1	0	0	0	0	lm3
USGS	26012	D-1411	412	Primates	Notharctidae	Cantius	abditus	1	0	0	0	0	lm2-3
USGS	25807	D-1779	412	Primates	Notharctidae	Cantius	abditus	1	4.76	4.07	0	0	lm1-2
USGS	25818	D-1779	412	Primates	Notharctidae	Cantius	abditus	1	0	0	0	0	lm2-3
USGS	38014	D-1779	412	Primates	Notharctidae	Cantius	abditus	1	0	0	0	0	lM1-3
NMNH	uncatalogued	Y-237	412	Primates	Notharctidae	Cantius	abditus	1					rm2-3 broken
USGS	25990	D-1774	413	Primates	Notharctidae	Cantius	abditus	1	4.46	3.88	0	0	lp3-m3
USGS	26001	D-1774	413	Primates	Notharctidae	Cantius	abditus	1	0	0	4.8	3.85	rp3-m3
USGS	26009	D-1774	413	Primates	Notharctidae	Cantius	abditus	1	0	0	0	0	lm2-3
USGS	26010	D-1774	413	Primates	Notharctidae	Cantius	abditus	1	0	0	0	0	lm3
USGS	8581	D-1410	414	Primates	Notharctidae	Cantius	abditus	1	4.71	3.97	0	0	lp4-m2
USGS	8582	D-1410	414	Primates	Notharctidae	Cantius	abditus	1	0	0	4.8	3.96	rm1-3
USGS	8583	D-1410	414	Primates	Notharctidae	Cantius	abditus	1	0	0	0	0	lm1-3, broken
USGS	8584	D-1410	414	Primates	Notharctidae	Cantius	abditus	1	0	0	0	0	rP3-4
USGS	8586	D-1410	414	Primates	Notharctidae	Cantius	abditus	1	0	0	0	0	rM2-3
USGS	8587	D-1410	414	Primates	Notharctidae	Cantius	abditus	2	0	0	0	0	misc m3
USGS	30189	D-1410	414	Primates	Notharctidae	Cantius	abditus	1	4.61	3.58	0	0	lm1-2
USGS	25794	D-1528	414	Primates	Notharctidae	Cantius	abditus	1	0	0	4.81	3.87	rm1-2
USGS	10048	D-1541	414	Primates	Notharctidae	Cantius	abditus	1	0	0	0	0	lm2
USGS	10049	D-1541	414	Primates	Notharctidae	Cantius	abditus	1	0	0	0	0	lm2-3
USGS	25980	D-1541	414	Primates	Notharctidae	Cantius	abditus	1	0	0	4.67	3.72	rp4-m3
USGS	25981	D-1541	414	Primates	Notharctidae	Cantius	abditus	1	4.69	3.52	0	0	lp3-m1
USGS	16626	D-1680	414	Primates	Notharctidae	Cantius	abditus	1	4.94	3.66	0	0	lm1-3
USGS	16627	D-1680	414	Primates	Notharctidae	Cantius	abditus	1	5.04	4.11	0	0	lm1-3
USGS	26007	D-1762	414	Primates	Notharctidae	Cantius	abditus	1	0	0	0	0	rm2
USGS	30151	D-1863	414	Primates	Notharctidae	Cantius	abditus	1	0	0	0	0	lm2-3
USGS	30155	D-1863	414	Primates	Notharctidae	Cantius	abditus	1	4.69	4.02	0	0	rm1
USGS	25326	Y-69	414	Primates	Notharctidae	Cantius	abditus	1	0	0	0	0	lm2-3, lM1-3, assoc bits
USGS	8802	D-1483	415	Primates	Notharctidae	Cantius	abditus	1	0	0	0	0	rm2-3
USGS	8803	D-1483	415	Primates	Notharctidae	Cantius	abditus	1	0	0	0	0	rm3
USGS	25936	D-1747	415	Primates	Notharctidae	Cantius	abditus	1	5.07	3.87	0	0	lp4-m1
USGS	25937	D-1747	415	Primates	Notharctidae	Cantius	abditus	1	0	0	4.99	3.71	rp4-m2
USGS	9949	D-1554	416	Primates	Notharctidae	Cantius	abditus	1	0	0	5.12	3.97	rp3-m2
USGS	9950	D-1554	416	Primates	Notharctidae	Cantius	abditus	1	0	0	4.51	3.72	rm1-3
USGS	9952	D-1554	416	Primates	Notharctidae	Cantius	abditus	1	0	0	0	0	rm3
USGS	25866	D-1821	416	Primates	Notharctidae	Cantius	abditus	1	0	0	4.63	3.76	rp4-m3
NMNH	487902	D-1821	416	Primates	Notharctidae	Cantius	abditus	1	0	0	0	0	lp3-m2
USGS	6324	D-1402	420	Primates	Notharctidae	Cantius	abditus	1	0	0	5.27	4.04	rm1-2
NMNH	495344	D-1403	420	Primates	Notharctidae	Cantius	abditus	1	0	0	0	0	lm1-2, bits, postcrania
NMNH	495356	D-1403	420	Primates	Notharctidae	Cantius	abditus	1	0	0	0	0	rp4-m1
USGS	13738	D-1443	420	Primates	Notharctidae	Cantius	abditus	1	0	0	0	0	rM1-2
USGS	6989	D-1530	420	Primates	Notharctidae	Cantius	abditus	1	4.73	3.61	0	0	lm1-3
USGS	7076	D-1530	420	Primates	Notharctidae	Cantius	abditus	1	0	0	4.46	3.72	rm1-2
USGS	7078	D-1530	420	Primates	Notharctidae	Cantius	abditus	1	4.78	3.9	0	0	lp4-m2
USGS	7079	D-1530	420	Primates	Notharctidae	Cantius	abditus	1	0	0	5.04	4.39	rp4-m1
USGS	7080	D-1530	420	Primates	Notharctidae	Cantius	abditus	7	4.74	3.98	5.05	3.96	r and lm1, misc teeth
USGS	28000	D-1530	420	Primates	Notharctidae	Cantius	abditus	1	0	0	4.94	4.18	rp3-m2
NMNH	511170	D-1530	420	Primates	Notharctidae	Cantius	abditus	1	0	0	0	0	lm2-3
NMNH	511171	D-1530	420	Primates	Notharctidae	Cantius	abditus	1	0	0	0	0	lm2-3
NMNH	511173	D-1530	420	Primates	Notharctidae	Cantius	abditus	1	0	0	0	0	lp4-m1
NMNH	511175	D-1530	420	Primates	Notharctidae	Cantius	abditus	1	0	0	0	0	lm1-2
NMNH	511279	D-1530	420	Primates	Notharctidae	Cantius	abditus	1	0	0	0	0	lm1-2
NMNH	511280	D-1530	420	Primates	Notharctidae	Cantius	abditus	1	0	0	0	0	lm3
USGS	27985	D-1946	422	Primates	Notharctidae	Cantius	abditus	1	0	0	0	0	lm2-3
USGS	27996	D-1946	422	Primates	Notharctidae	Cantius	abditus	1	0	0	4.69	3.93	rp3-m3, assoc l jaw frag
USGS	28028	D-1946	422	Primates	Notharctidae	Cantius	abditus	1	0	0	0	0	rm2-3
USGS	28029	D-1946	422	Primates	Notharctidae	Cantius	abditus	1	0	0	5.16	3.81	rp4-m2
USGS	28030	D-1946	422	Primates	Notharctidae	Cantius	abditus	1	0	0	0	0	lm3
USGS	30148	D-1946	422	Primates	Notharctidae	Cantius	abditus	1	0	0	0	0	rM1-3
USGS	30211	D-1946	422	Primates	Notharctidae	Cantius	abditus	1	0	0	0	0	rm2-3
USGS	30221	D-1946	422	Primates	Notharctidae	Cantius	abditus	1	0	0	0	0	lm2
USGS	30222	D-1946	422	Primates	Notharctidae	Cantius	abditus	1	0	0	4.9	4.14	rm1-2
USGS	1353	Y-320	423	Primates	Notharctidae	Cantius	abditus	1	0	0	0	0	lP4-M2
USGS	7398	Y-320	423	Primates	Notharctidae	Cantius	abditus	1	0	0	0	0	rm3
USGS	27187	Y-320	423	Primates	Notharctidae	Cantius	abditus	2	0	0	0	0	rm2, rm3
USGS	4561	D-1324	424	Primates	Notharctidae	Cantius	abditus	1	0	0	5.06	3.98	rm1-3
USGS	4562	D-1324	424	Primates	Notharctidae	Cantius	abditus	1	4.79	3.71	0	0	lm1-3
USGS	4563	D-1324	424	Primates	Notharctidae	Cantius	abditus	1	4.84	3.98	0	0	lp4-m1
USGS	4564	D-1324	424	Primates	Notharctidae	Cantius	abditus	1	4.95	3.99	0	0	lm1-2
USGS	4565	D-1324	424	Primates	Notharctidae	Cantius	abditus	1	0	0	4.91	4.12	rp4-m1
USGS	4566	D-1324	424	Primates	Notharctidae	Cantius	abditus	1	0	0	5.15	4.35	rp4-m2
USGS	4567	D-1324	424	Primates	Notharctidae	Cantius	abditus	1	0	0	0	0	rm2
USGS	4568	D-1324	424	Primates	Notharctidae	Cantius	abditus	2	0	0	0	0	misc M
USGS	4569	D-1324	424	Primates	Notharctidae	Cantius	abditus	3	0	0	0	0	misc m3
USGS	2495	D-1234	425	Primates	Notharctidae	Cantius	abditus	1	0	0	4.85	3.76	rm1-2
USGS	2496	D-1234	425	Primates	Notharctidae	Cantius	abditus	2	0	0	0	0	misc teeth
USGS	4465	D-1326	425	Primates	Notharctidae	Cantius	abditus	1	5.14	4.2	5.27	4.2	lm1-3, rp4-m3
USGS	4503	D-1326	425	Primates	Notharctidae	Cantius	abditus	1	5	3.83	0	0	lm1-3
USGS	4504	D-1326	425	Primates	Notharctidae	Cantius	abditus	1	0	0	0	0	lm2-3
USGS	4505	D-1326	425	Primates	Notharctidae	Cantius	abditus	1	5.04	4.18	0	0	lp4-m2
USGS	4506	D-1326	425	Primates	Notharctidae	Cantius	abditus	1	0	0	0	0	lm2-3
USGS	4507	D-1326	425	Primates	Notharctidae	Cantius	abditus	1	0	0	0	0	rm2-3
USGS	4508	D-1326	425	Primates	Notharctidae	Cantius	abditus	1	4.85	4	0	0	lp4-m1
USGS	4510	D-1326	425	Primates	Notharctidae	Cantius	abditus	1	5.18	4.06	0	0	lm1-3
USGS	4511	D-1326	425	Primates	Notharctidae	Cantius	abditus	1	4.92	4.08	0	0	lp3-m1
USGS	4512	D-1326	425	Primates	Notharctidae	Cantius	abditus	1	0	0	0	0	lm2-3
USGS	4513	D-1326	425	Primates	Notharctidae	Cantius	abditus	1	4.83	4.08	0	0	lp4-m2
USGS	4514	D-1326	425	Primates	Notharctidae	Cantius	abditus	1	4.75	4.09	0	0	lp4-m3
USGS	4515	D-1326	425	Primates	Notharctidae	Cantius	abditus	1	5.06	4.12	0	0	lm1-2
USGS	4516	D-1326	425	Primates	Notharctidae	Cantius	abditus	1	0	0	0	0	rp3-4
USGS	4517	D-1326	425	Primates	Notharctidae	Cantius	abditus	1	0	0	0	0	lm3
USGS	4518	D-1326	425	Primates	Notharctidae	Cantius	abditus	1	0	0	0	0	rm2-3
USGS	4520	D-1326	425	Primates	Notharctidae	Cantius	abditus	1	0	0	4.73	4.04	rm1
USGS	4521	D-1326	425	Primates	Notharctidae	Cantius	abditus	1	0	0	4.69	3.98	rp3-m2
USGS	4522	D-1326	425	Primates	Notharctidae	Cantius	abditus	1	0	0	5.04	4.24	rm1-2
USGS	4523	D-1326	425	Primates	Notharctidae	Cantius	abditus	1	0	0	0	0	lm2
USGS	4524	D-1326	425	Primates	Notharctidae	Cantius	abditus	1	0	0	5.32	4.24	rp4-m1
USGS	4525	D-1326	425	Primates	Notharctidae	Cantius	abditus	1	0	0	0	0	rp3-4
USGS	4526	D-1326	425	Primates	Notharctidae	Cantius	abditus	1	0	0	4.83	4.08	rm1-2
USGS	4527	D-1326	425	Primates	Notharctidae	Cantius	abditus	1	0	0	0	0	lm2-3
USGS	4528	D-1326	425	Primates	Notharctidae	Cantius	abditus	1	0	0	5.32	3.98	rp4-m1
USGS	4529	D-1326	425	Primates	Notharctidae	Cantius	abditus	1	0	0	0	0	lm1-2, broken
USGS	4530	D-1326	425	Primates	Notharctidae	Cantius	abditus	1	0	0	0	0	rm1-2, broken
USGS	4531	D-1326	425	Primates	Notharctidae	Cantius	abditus	1	0	0	4.86	3.74	rm1-2
USGS	4532	D-1326	425	Primates	Notharctidae	Cantius	abditus	1	5.1	3.76	0	0	lm1-2
USGS	4533	D-1326	425	Primates	Notharctidae	Cantius	abditus	1	0	0	0	0	rM1-2
USGS	4535	D-1326	425	Primates	Notharctidae	Cantius	abditus	1	0	0	0	0	rP3-M3
USGS	4537	D-1326	425	Primates	Notharctidae	Cantius	abditus	3	0	0	0	0	misc m3
USGS	4538	D-1326	425	Primates	Notharctidae	Cantius	abditus	3	0	0	0	0	misc m2
USGS	4539	D-1326	425	Primates	Notharctidae	Cantius	abditus	1	0	0	5.19	4.14	rm1
USGS	4540	D-1326	425	Primates	Notharctidae	Cantius	abditus	2	0	0	0	0	misc p4
USGS	4541	D-1326	425	Primates	Notharctidae	Cantius	abditus	1	0	0	0	0	rP4-M3
USGS	4542	D-1326	425	Primates	Notharctidae	Cantius	abditus	1	0	0	0	0	rM1-2
USGS	4591	D-1326	425	Primates	Notharctidae	Cantius	abditus	1	5.25	3.99	0	0	lm1-3, rm2-3
USGS	4592	D-1326	425	Primates	Notharctidae	Cantius	abditus	1	0	0	0	0	rp4-m3, broken
USGS	4684	D-1326	425	Primates	Notharctidae	Cantius	abditus	1	0	0	0	0	lp3-4, lm2
USGS	5634	D-1326	425	Primates	Notharctidae	Cantius	abditus	1	0	0	0	0	lP4-M1
USGS	8277	D-1326	425	Primates	Notharctidae	Cantius	abditus	2	0	0	0	0	misc teeth
USGS	8966	D-1326	425	Primates	Notharctidae	Cantius	abditus	1	5.11	4.01	0	0	lm1
USGS	13649	D-1326	425	Primates	Notharctidae	Cantius	abditus	1	0	0	0	0	lm2
USGS	4615	RB-8	425	Primates	Notharctidae	Cantius	abditus	1	0	0	0	0	assoc jaw frags
USGS	4618	D-1309	426	Primates	Notharctidae	Cantius	abditus	1	0	0	0	0	lm2
USGS	4619	D-1309	426	Primates	Notharctidae	Cantius	abditus	1	0	0	0	0	lm3
USGS	4688	D-1309	426	Primates	Notharctidae	Cantius	abditus	1	4.51	3.82	0	0	lp4-m2
USGS	30182	D-1822	426	Primates	Notharctidae	Cantius	abditus	1	0	0	0	0	rm1-2, worn
USGS	30226	D-1822	426	Primates	Notharctidae	Cantius	abditus	1	0	0	0	0	lm2-3
USGS	4490	D-1330	428	Primates	Notharctidae	Cantius	abditus	1	4.96	3.82	0	0	lp4-m3
USGS	13623	D-1598	428	Primates	Notharctidae	Cantius	abditus	2	0	0	0	0	rm3, jaw frag
USGS	30109	D-1897	428	Primates	Notharctidae	Cantius	abditus	1	5.31	4.15	0	0	lp4-m1
USGS	30299	D-1897	428	Primates	Notharctidae	Cantius	abditus	3	0	0	0	0	misc teeth
USGS	4485	D-1349	430	Primates	Notharctidae	Cantius	abditus	1	0	0	0	0	rm2-3
USGS	4486	D-1349	430	Primates	Notharctidae	Cantius	abditus	1	0	0	0	0	rm2
USGS	4487	D-1349	430	Primates	Notharctidae	Cantius	abditus	1	0	0	0	0	rp3-4
USGS	4488	D-1349	430	Primates	Notharctidae	Cantius	abditus	1	0	0	0	0	lP4-M3
USGS	8044	D-1376	430	Primates	Notharctidae	Cantius	abditus	1	0	0	0	0	lp4
USGS	4609	D-1380	430	Primates	Notharctidae	Cantius	abditus	1	0	0	0	0	lp4
USGS	4610	D-1380	430	Primates	Notharctidae	Cantius	abditus	1	0	0	0	0	rm2-3
USGS	4611	D-1380	430	Primates	Notharctidae	Cantius	abditus	1	0	0	0	0	rm2-3
USGS	4612	D-1380	430	Primates	Notharctidae	Cantius	abditus	1	0	0	0	0	rm2-3
USGS	4613	D-1380	430	Primates	Notharctidae	Cantius	abditus	1	0	0	0	0	lm2-3
USGS	4614	D-1380	430	Primates	Notharctidae	Cantius	abditus	1	0	0	0	0	lm2
USGS	4482	D-1382	430	Primates	Notharctidae	Cantius	abditus	1	0	0	5.12	4.07	rm1-2
USGS	4483	D-1382	430	Primates	Notharctidae	Cantius	abditus	1	0	0	0	0	lP2-3
USGS	25770	D-1486/1487	430	Primates	Notharctidae	Cantius	abditus	1	0	0	0	0	lm3
USGS	25771	D-1486/1487	430	Primates	Notharctidae	Cantius	abditus	1	0	0	0	0	lm2
USGS	9879	Y-251	430	Primates	Notharctidae	Cantius	abditus	1	0	0	4.92	4.21	rp4-m2
USGS	9882	Y-251	430	Primates	Notharctidae	Cantius	abditus	2	0	0	0	0	misc teeth
USGS	4621	D-1347	431	Primates	Notharctidae	Cantius	abditus	1	0	0	5.17	4.41	rp4-m1
USGS	30241	D-2012	432	Primates	Notharctidae	Cantius	abditus	4	0	0	0	0	misc teeth
USGS	8057	D-1399	434	Primates	Notharctidae	Cantius	abditus	1	0	0	0	0	lm2
USGS	10091	D-1570	435	Primates	Notharctidae	Cantius	abditus	13	0	0	0	0	misc teeth
USGS	10450	D-1570	435	Primates	Notharctidae	Cantius	abditus	1	0	0	0	0	r and lm3
USGS	10491	D-1571	435	Primates	Notharctidae	Cantius	abditus	1	0	0	0	0	lm2-3
USGS	10492	D-1571	435	Primates	Notharctidae	Cantius	abditus	1	0	0	0	0	lm3, rm2-3
USGS	10493	D-1571	435	Primates	Notharctidae	Cantius	abditus	1	0	0	0	0	rm2-3
USGS	10494	D-1571	435	Primates	Notharctidae	Cantius	abditus	1	0	0	0	0	lp3
USGS	27636	D-1876	435	Primates	Notharctidae	Cantius	abditus	1	0	0	0	0	rm1 frag
USGS	27637	D-1876	435	Primates	Notharctidae	Cantius	abditus	1	0	0	0	0	lm2
USGS	4673	D-1377	436	Primates	Notharctidae	Cantius	abditus	1	0	0	4.5	3.76	rp3-m1
USGS	4674	D-1377	436	Primates	Notharctidae	Cantius	abditus	1	0	0	4.83	3.96	rm1-2
USGS	4675	D-1377	436	Primates	Notharctidae	Cantius	abditus	1	4.98	4.19	0	0	lm1-2
USGS	4676	D-1377	436	Primates	Notharctidae	Cantius	abditus	1	0	0	0	0	lM2
USGS	8446	D-1377	436	Primates	Notharctidae	Cantius	abditus	1	0	0	0	0	rm2-3
USGS	8447	D-1377	436	Primates	Notharctidae	Cantius	abditus	1	4.8	3.96	0	0	lm1-2
USGS	8448	D-1377	436	Primates	Notharctidae	Cantius	abditus	1	0	0	0	0	lm2-3
USGS	8449	D-1377	436	Primates	Notharctidae	Cantius	abditus	1	0	0	4.68	3.88	rm1-2
USGS	8450	D-1377	436	Primates	Notharctidae	Cantius	abditus	1	0	0	0	0	rM2-3
USGS	8451	D-1377	436	Primates	Notharctidae	Cantius	abditus	1	0	0	0	0	rP2-3
USGS	8452	D-1377	436	Primates	Notharctidae	Cantius	abditus	3	0	0	0	0	misc m3's
USGS	9707	D-1518	436	Primates	Notharctidae	Cantius	abditus	1	0	0	0	0	lm2-3
USGS	9708	D-1518	436	Primates	Notharctidae	Cantius	abditus	1	0	0	5.51	4.03	rm1-3
USGS	9709	D-1518	436	Primates	Notharctidae	Cantius	abditus	2	0	0	0	0	misc teeth
USGS	446	D-1203	438	Primates	Notharctidae	Cantius	abditus	1	0	0	0	0	rm2
USGS	1340	D-1203	438	Primates	Notharctidae	Cantius	abditus	2	0	0	0	0	rm3, M3
USGS	25776	D-1203	438	Primates	Notharctidae	Cantius	abditus	1	0	0	4.72	3.65	rp4-m1
USGS	25787	D-1203	438	Primates	Notharctidae	Cantius	abditus	1	0	0	0	0	rm2-3
USGS	10062	D-1206	438	Primates	Notharctidae	Cantius	abditus	1	4.59	3.73	0	0	lm1-2
USGS	10063	D-1206	438	Primates	Notharctidae	Cantius	abditus	1	0	0	0	0	rp4-m2, broken
USGS	10064	D-1206	438	Primates	Notharctidae	Cantius	abditus	1	0	0	0	0	rm2
USGS	25965	D-1206	438	Primates	Notharctidae	Cantius	abditus	1	0	0	0	0	lm2-3
USGS	26003	D-1206	438	Primates	Notharctidae	Cantius	abditus	2	0	0	0	0	jaw frag, tooth frag
USGS	369	D-1208	438	Primates	Notharctidae	Cantius	abditus	1	0	0	0	0	lp4, lm2
USGS	400	D-1208	438	Primates	Notharctidae	Cantius	abditus	1	0	0	0	0	rm2-3
USGS	410	D-1208	438	Primates	Notharctidae	Cantius	abditus	1	0	0	4.84	3.65	rp4-m2
USGS	419	D-1208	438	Primates	Notharctidae	Cantius	abditus	1	0	0	0	0	rP3-M3
NMNH	uncatalogued	D-1208	438	Primates	Notharctidae	Cantius	abditus	1	5.22	4.1			lp3-m2
NMNH	522195	D-1320	438	Primates	Notharctidae	Cantius	abditus	4	0	0	0	0	lm1-3, 2 x rm2-3, lm2
USGS	4476	D-1322	438	Primates	Notharctidae	Cantius	abditus	1	0	0	0	0	rP3-M3
USGS	4534	D-1325	438	Primates	Notharctidae	Cantius	abditus	1	0	0	0	0	lP4-M3
USGS	8763	D-1398	438	Primates	Notharctidae	Cantius	abditus	1	4.99	4.14	0	0	lm1-3
USGS	8764	D-1398	438	Primates	Notharctidae	Cantius	abditus	2	0	0	4.93	3.92	rm1, lm2-3
USGS	13728	D-1400	438	Primates	Notharctidae	Cantius	abditus	1	0	0	0	0	lm
USGS	8427	D-1401	438	Primates	Notharctidae	Cantius	abditus	1	0	0	0	0	lm2
USGS	8780	D-1404	438	Primates	Notharctidae	Cantius	abditus	1	0	0	0	0	rm1-2, broken
USGS	8781	D-1404	438	Primates	Notharctidae	Cantius	abditus	1	0	0	0	0	lm2-3
USGS	8782	D-1404	438	Primates	Notharctidae	Cantius	abditus	1	0	0	0	0	lP4-M3
USGS	8784	D-1404	438	Primates	Notharctidae	Cantius	abditus	2	4.46	3.68	0	0	lm1, lm2
NMNH	uncatalogued	D-1404	438	Primates	Notharctidae	Cantius	abditus	1	4.49	4.05			lp4-m3
USGS	8968	D-1405	438	Primates	Notharctidae	Cantius	abditus	1	4.9	3.78	0	0	lp3-m1
USGS	23686	D-1405	438	Primates	Notharctidae	Cantius	abditus	1	5.04	4.06	0	0	lm1-3
USGS	23687	D-1405	438	Primates	Notharctidae	Cantius	abditus	1	4.71	3.91	0	0	lm1-2
USGS	23729-duplicate	D-1459	438	Primates	Notharctidae	Cantius	abditus	1	4.62	3.72	0	0	lm1-2
USGS	16546	D-1693	438	Primates	Notharctidae	Cantius	abditus	1	5.08	4.27	0	0	lp3-m2
USGS	16547	D-1693	438	Primates	Notharctidae	Cantius	abditus	1	0	0	0	0	rm2-3
USGS	16548	D-1693	438	Primates	Notharctidae	Cantius	abditus	6	0	0	0	0	misc jaw frags
USGS	16549	D-1693	438	Primates	Notharctidae	Cantius	abditus	1	5.03	3.85	0	0	lm1-3
USGS	16550	D-1693	438	Primates	Notharctidae	Cantius	abditus	1	0	0	0	0	lm2-3
USGS	16551	D-1693	438	Primates	Notharctidae	Cantius	abditus	1	0	0	4.86	4.07	rp4-m2
USGS	16552	D-1693	438	Primates	Notharctidae	Cantius	abditus	1	0	0	0	0	lm2-3
USGS	16553	D-1693	438	Primates	Notharctidae	Cantius	abditus	1	4.93	4.09	0	0	lp4-m1
USGS	16557	D-1693	438	Primates	Notharctidae	Cantius	abditus	1	0	0	4.7	3.78	rp4-m1
USGS	16558	D-1693	438	Primates	Notharctidae	Cantius	abditus	1	4.69	3.87	0	0	lp4-m1
USGS	16559	D-1693	438	Primates	Notharctidae	Cantius	abditus	2	0	0	5	3.77	rm1-2, rP3-M3
USGS	16560	D-1693	438	Primates	Notharctidae	Cantius	abditus	1	4.59	3.89	0	0	lm1-3, assoc bone
USGS	16561	D-1693	438	Primates	Notharctidae	Cantius	abditus	1	0	0	0	0	tooth mash
USGS	16562	D-1693	438	Primates	Notharctidae	Cantius	abditus	1	0	0	0	0	rP3-M2
USGS	18130	D-1693	438	Primates	Notharctidae	Cantius	abditus	1	0	0	0	0	rM1-3, assoc bits
USGS	23768	D-1693	438	Primates	Notharctidae	Cantius	abditus	1	0	0	0	0	rm2-3
USGS	23769	D-1693	438	Primates	Notharctidae	Cantius	abditus	1	0	0	0	0	lP4-M3
USGS	23773	D-1693	438	Primates	Notharctidae	Cantius	abditus	1	0	0	0	0	lP4-M3
USGS	25919	D-1748/1749	438	Primates	Notharctidae	Cantius	abditus	1	0	0	0	0	lP4-M2
USGS	25977	D-1748/1749	438	Primates	Notharctidae	Cantius	abditus	1	0	0	0	0	lm2-3
USGS	25970	D-1428	440	Primates	Notharctidae	Cantius	abditus	2	5.3	4.11	0	0	lp4-m1, jaw frag
USGS	7403	D-1452	440	Primates	Notharctidae	Cantius	abditus	1	0	0	0	0	rP3-M2
USGS	7404	D-1452	440	Primates	Notharctidae	Cantius	abditus	1	0	0	0	0	lP3-M2
USGS	7408	D-1452	440	Primates	Notharctidae	Cantius	abditus	1	0	0	4.91	4.39	rm1-3
USGS	7409	D-1452	440	Primates	Notharctidae	Cantius	abditus	1	4.6	3.97	0	0	lp3-m2
USGS	7410	D-1452	440	Primates	Notharctidae	Cantius	abditus	1	4.77	3.96	0	0	lm1-2
USGS	7411	D-1452	440	Primates	Notharctidae	Cantius	abditus	1	0	0	0	0	rm2-3
USGS	7412	D-1452	440	Primates	Notharctidae	Cantius	abditus	1	0	0	0	0	rP3-4, rM2
USGS	7414	D-1452	440	Primates	Notharctidae	Cantius	abditus	1	0	0	0	0	rP3-M3
USGS	7415	D-1452	440	Primates	Notharctidae	Cantius	abditus	1	0	0	0	0	rm2-3
USGS	7416	D-1452	440	Primates	Notharctidae	Cantius	abditus	1	0	0	0	0	rp3-4
USGS	7418	D-1452	440	Primates	Notharctidae	Cantius	abditus	1	0	0	4.82	4.01	rp4-m1
USGS	7422	D-1452	440	Primates	Notharctidae	Cantius	abditus	5	0	0	0	0	misc teeth
NMNH	511121	WW-51	440	Primates	Notharctidae	Cantius	abditus	1	0	0	0	0	rp4-m3
NMNH	511122	WW-51	440	Primates	Notharctidae	Cantius	abditus	1	0	0	0	0	rp4-m2
USGS	4545	D-1310	442	Primates	Notharctidae	Cantius	abditus	1	5.13	4.26	0	0	lm1-3
USGS	4547	D-1310	442	Primates	Notharctidae	Cantius	abditus	1	0	0	0	0	rm2-3
USGS	4549	D-1310	442	Primates	Notharctidae	Cantius	abditus	1	0	0	0	0	lm2-3 frags
USGS	4551	D-1310	442	Primates	Notharctidae	Cantius	abditus	1	0	0	0	0	lM2-3
USGS	4553	D-1310	442	Primates	Notharctidae	Cantius	abditus	1	0	0	0	0	rm2-3
USGS	4554	D-1310	442	Primates	Notharctidae	Cantius	abditus	1	0	0	4.89	3.74	rm1-2
USGS	4555	D-1310	442	Primates	Notharctidae	Cantius	abditus	1	4.87	3.63	0	0	lm1-3
USGS	4558	D-1310	442	Primates	Notharctidae	Cantius	abditus	1	0	0	0	0	rM2
USGS	4559	D-1310	442	Primates	Notharctidae	Cantius	abditus	1	0	0	0	0	lm3 frag
USGS	4560	D-1310	442	Primates	Notharctidae	Cantius	abditus	2	0	0	0	0	misc p
USGS	13557	D-1310	442	Primates	Notharctidae	Cantius	abditus	2	0	0	0	0	lm2, rm3
USGS	4578	D-1311	442	Primates	Notharctidae	Cantius	abditus	1	0	0	0	0	lm2-3
USGS	4586	D-1311	442	Primates	Notharctidae	Cantius	abditus	1	0	0	0	0	rp3
USGS	4587	D-1311	442	Primates	Notharctidae	Cantius	abditus	3	0	0	0	0	misc M
USGS	4588	D-1311	442	Primates	Notharctidae	Cantius	abditus	2	0	0	0	0	2m2
USGS	13633	D-1311	442	Primates	Notharctidae	Cantius	abditus	3	0	0	0	0	misc m
USGS	27389	D-1311	442	Primates	Notharctidae	Cantius	abditus	2	0	0	0	0	misc m3
NMNH	uncatalogued	D-1311	442	Primates	Notharctidae	Cantius	abditus	2			5.95	4.65	rp3-m1, lm2
USGS	30018	D-1407	442	Primates	Notharctidae	Cantius	abditus	1	0	0	0	0	lm2
USGS	30033	D-1407	442	Primates	Notharctidae	Cantius	abditus	4	0	0	0	0	misc teeth
USGS	15466	D-1588	442	Primates	Notharctidae	Cantius	abditus	1	0	0	0	0	rp4
USGS	16540	D-1588	442	Primates	Notharctidae	Cantius	abditus	1	5.26	4.27	0	0	lm1-3
USGS	16530	D-1660	442	Primates	Notharctidae	Cantius	abditus	1	0	0	0	0	lM1-2
USGS	16531	D-1660	442	Primates	Notharctidae	Cantius	abditus	2	0	0	0	0	rp4, lm2
USGS	15435	D-1688	442	Primates	Notharctidae	Cantius	abditus	1	5.14	4.37	0	0	ldp4-m2
USGS	16539	D-1657	443	Primates	Notharctidae	Cantius	abditus	1	0	0	0	0	rm2-3
USGS	13641	D-1587	444	Primates	Notharctidae	Cantius	abditus	1	0	0	0	0	rm2-3
USGS	8245	D-1429	446	Primates	Notharctidae	Cantius	abditus	1	0	0	0	0	lm3
USGS	8502	D-1429	446	Primates	Notharctidae	Cantius	abditus	1	0	0	0	0	rm2-3
USGS	8503	D-1429	446	Primates	Notharctidae	Cantius	abditus	1	4.92	4.13	0	0	lm1-2
USGS	8504	D-1429	446	Primates	Notharctidae	Cantius	abditus	1	0	0	0	0	rm2
USGS	13648	D-1429	446	Primates	Notharctidae	Cantius	abditus	1	0	0	0	0	lM1-2, c
USGS	4692	Y-340	446	Primates	Notharctidae	Cantius	abditus	1	0	0	0	0	lP3-4
USGS	4693	Y-340	446	Primates	Notharctidae	Cantius	abditus	5	0	0	0	0	misc teeth
USGS	375	D-1207	448	Primates	Notharctidae	Cantius	abditus	1	5.05	3.97	0	0	lp4-m1
USGS	378	D-1207	448	Primates	Notharctidae	Cantius	abditus	1	0	0	4.74	4.13	rp4-m1
USGS	384	D-1207	448	Primates	Notharctidae	Cantius	abditus	1	0	0	0	0	rm2
USGS	386	D-1207	448	Primates	Notharctidae	Cantius	abditus	1	0	0	0	0	rM1-2
USGS	388	D-1207	448	Primates	Notharctidae	Cantius	abditus	1	5.02	4	0	0	lm1-2
USGS	399	D-1207	448	Primates	Notharctidae	Cantius	abditus	1	4.66	3.8	0	0	lm1-2
USGS	443	D-1207	448	Primates	Notharctidae	Cantius	abditus	1	0	0	0	0	lm2
USGS	448	D-1207	448	Primates	Notharctidae	Cantius	abditus	1	4.77	3.85	0	0	lm1-2
USGS	467	D-1207	448	Primates	Notharctidae	Cantius	abditus	1	0	0	0	0	rm2-3
NMNH	542114	D-1207	448	Primates	Notharctidae	Cantius	abditus	1					L max with P3-M3
USGS	8921	D-1451	448	Primates	Notharctidae	Cantius	abditus	1	0	0	0	0	lm2
USGS	9936	D-1537	449	Primates	Notharctidae	Cantius	abditus	1	0	0	5.19	3.95	rm1-3
USGS	9937	D-1537	449	Primates	Notharctidae	Cantius	abditus	1	5.27	4.17	0	0	lp3-m2
USGS	9938	D-1537	449	Primates	Notharctidae	Cantius	abditus	1	0	0	0	0	lp3-4
USGS	9939	D-1537	449	Primates	Notharctidae	Cantius	abditus	1	5.12	4.31	0	0	lp4-m1
USGS	9941	D-1537	449	Primates	Notharctidae	Cantius	abditus	3	0	0	0	0	misc teeth
USGS	16639	D-1537	449	Primates	Notharctidae	Cantius	abditus	7	5.07	3.96	4.8	3.6	r and lm1, misc teeth
USGS	16640	D-1537	449	Primates	Notharctidae	Cantius	abditus	1	0	0	0	0	lM1-3
USGS	13608	D-1599	449	Primates	Notharctidae	Cantius	abditus	1	0	0	0	0	rM2
USGS	13609	D-1599	449	Primates	Notharctidae	Cantius	abditus	1	0	0	0	0	lp3-4
USGS	13611	D-1599	449	Primates	Notharctidae	Cantius	abditus	5	0	0	0	0	misc teeth
USGS	9995	D-1536	450	Primates	Notharctidae	Cantius	abditus	1	0	0	5.01	3.94	rm1-2, assoc bit
USGS	9996	D-1536	450	Primates	Notharctidae	Cantius	abditus	10	5.21	4.32	5.17	4.1	r and lm1, misc teeth
USGS	9997	D-1536	450	Primates	Notharctidae	Cantius	abditus	1	0	0	0	0	rm2-3
USGS	9999	D-1536	450	Primates	Notharctidae	Cantius	abditus	1	0	0	5.14	4.32	rm1-2
USGS	10021	D-1536	450	Primates	Notharctidae	Cantius	abditus	1	0	0	0	0	rP3-M3
USGS	10022	D-1536	450	Primates	Notharctidae	Cantius	abditus	1	0	0	0	0	rm2-3
USGS	10024	D-1536	450	Primates	Notharctidae	Cantius	abditus	1	0	0	0	0	rM1-3
USGS	10025	D-1536	450	Primates	Notharctidae	Cantius	abditus	1	0	0	0	0	rm2-3
USGS	10026	D-1536	450	Primates	Notharctidae	Cantius	abditus	1	0	0	5.02	4.14	rm1-2
USGS	10027	D-1536	450	Primates	Notharctidae	Cantius	abditus	1	5.23	4.35	0	0	lp4-m1
USGS	10028	D-1536	450	Primates	Notharctidae	Cantius	abditus	1	0	0	0	0	lp2-3
USGS	10473	D-1536	450	Primates	Notharctidae	Cantius	abditus	1	5.2	4.43	0	0	lp4-m1
USGS	10474	D-1536	450	Primates	Notharctidae	Cantius	abditus	3	0	0	0	0	misc teeth
USGS	1963	D-1209	452	Primates	Notharctidae	Cantius	abditus	1	0	0	0	0	rp4-m1, worn
USGS	1964	D-1209	452	Primates	Notharctidae	Cantius	abditus	1	0	0	4.91	3.77	rm1
USGS	9258	D-1497	452	Primates	Notharctidae	Cantius	abditus	1	0	0	0	0	c
USGS	9259	D-1497	452	Primates	Notharctidae	Cantius	abditus	1	0	0	0	0	ldP4
USGS	9260	D-1497	452	Primates	Notharctidae	Cantius	abditus	2	0	0	0	0	2, rm3 frag
USGS	9261	D-1497	452	Primates	Notharctidae	Cantius	abditus	1	0	0	0	0	lm2
USGS	9262	D-1497	452	Primates	Notharctidae	Cantius	abditus	1	0	0	0	0	lp3-4
USGS	9345	D-1497	452	Primates	Notharctidae	Cantius	abditus	1	0	0	0	0	lM3
USGS	16511	D-1698	455	Primates	Notharctidae	Cantius	abditus	1	0	0	0	0	lP3-M3
USGS	16512	D-1698	455	Primates	Notharctidae	Cantius	abditus	1	0	0	0	0	rP4-M3
USGS	16513	D-1698	455	Primates	Notharctidae	Cantius	abditus	1	4.89	3.78	0	0	lp4-m1
USGS	16515	D-1698	455	Primates	Notharctidae	Cantius	abditus	2	0	0	0	0	rm2, m frag
NMNH	538275	D-1698	455	Primates	Notharctidae	Cantius	abditus	2					L dentary with m2 talonid-m3, R dentary with m2, p4-m1 alveoli
USGS	25934	D-1784	455	Primates	Notharctidae	Cantius	abditus	1	0	0	5.23	4.27	rm1-2
USGS	8169	Y-100	455	Primates	Notharctidae	Cantius	abditus	1	0	0	0	0	rM2
USGS	23491	Y-100	455	Primates	Notharctidae	Cantius	abditus	1	0	0	4.7	4.13	rm1-2
USGS	23751	Y-100	455	Primates	Notharctidae	Cantius	abditus	1	0	0	0	0	rM1
USGS	23752	Y-100	455	Primates	Notharctidae	Cantius	abditus	1	0	0	0	0	lP4-M3
USGS	25920	Y-100	455	Primates	Notharctidae	Cantius	abditus	2	0	0	0	0	rm2, frag
USGS	25921	Y-100	455	Primates	Notharctidae	Cantius	abditus	1	0	0	0	0	rM1-2
USGS	25922	Y-100	455	Primates	Notharctidae	Cantius	abditus	1	0	0	0	0	rM1-2
USGS	25923	Y-100	455	Primates	Notharctidae	Cantius	abditus	1	0	0	0	0	rm2-3
USGS	25924	Y-100	455	Primates	Notharctidae	Cantius	abditus	1	0	0	0	0	rm2-3
USGS	25925	Y-100	455	Primates	Notharctidae	Cantius	abditus	1	0	0	5.09	4.1	rp4-m2
USGS	27613	Y-100	455	Primates	Notharctidae	Cantius	abditus	1	0	0	0	0	rP3-4
USGS	27622	Y-100	455	Primates	Notharctidae	Cantius	abditus	2	0	0	0	0	misc teeth
USGS	27627	Y-100	455	Primates	Notharctidae	Cantius	abditus	1	0	0	0	0	r jaw frag
USGS	27628	Y-100	455	Primates	Notharctidae	Cantius	abditus	1	0	0	0	0	lm1-2, covered
USGS	27629	Y-100	455	Primates	Notharctidae	Cantius	abditus	4	0	0	0	0	misc teeth
USGS	27632	Y-100	455	Primates	Notharctidae	Cantius	abditus	1	0	0	4.91	4.3	rp3-m2
USGS	27738	Y-100	455	Primates	Notharctidae	Cantius	abditus	1	5.17	3.97	0	0	lm1-3
USGS	38027	Y-100	455	Primates	Notharctidae	Cantius	abditus	1	0	0	0	0	rm2-3
USGS	10034	Y-227	457	Primates	Notharctidae	Cantius	abditus	1	0	0	0	0	rm2
USGS	13730	Y-227	457	Primates	Notharctidae	Cantius	abditus	1	0	0	0	0	rM2
USGS	26543	Y-227	457	Primates	Notharctidae	Cantius	abditus	1	0	0	0	0	rm2-3
NMNH	522202	Y-227	457	Primates	Notharctidae	Cantius	abditus	1	0	0	0	0	lp3-m3
USGS	13536	D-1602	463	Primates	Notharctidae	Cantius	abditus	1	0	0	4.95	3.96	rp4-m3
USGS	13537	D-1602	463	Primates	Notharctidae	Cantius	abditus	1	0	0	0	0	misc tooth frags
USGS	13538	D-1602	463	Primates	Notharctidae	Cantius	abditus	1	0	0	0	0	lP4-M3
USGS	7210	D-1603	463	Primates	Notharctidae	Cantius	abditus	1	0	0	0	0	rP3-M1
USGS	7211	D-1603	463	Primates	Notharctidae	Cantius	abditus	1	0	0	0	0	lM2
USGS	7212	D-1603	463	Primates	Notharctidae	Cantius	abditus	1	5.04	4.23	0	0	lm1
USGS	7214	D-1603	463	Primates	Notharctidae	Cantius	abditus	1	4.85	4.01	4.71	3.82	lm1-3, rp4-m3
USGS	23740	D-1603	463	Primates	Notharctidae	Cantius	abditus	1	0	0	0	0	lm2
USGS	27680	D-1603	463	Primates	Notharctidae	Cantius	abditus	2	0	0	0	0	misc teeth
USGS	27753	D-1603	463	Primates	Notharctidae	Cantius	abditus	1	0	0	0	0	lM2-3
USGS	38031	D-1603	463	Primates	Notharctidae	Cantius	abditus	1	0	0	0	0	rP3-M3
USGS	13540	D-1604	463	Primates	Notharctidae	Cantius	abditus	1	5.37	4.18	0	0	lp4-m3
USGS	13541	D-1604	463	Primates	Notharctidae	Cantius	abditus	1	5.27	4.35	0	0	lm1-3
USGS	13542	D-1604	463	Primates	Notharctidae	Cantius	abditus	1	0	0	0	0	p4-M3
USGS	13543	D-1604	463	Primates	Notharctidae	Cantius	abditus	1	0	0	5.11	4.02	rm1-2
USGS	13544	D-1604	463	Primates	Notharctidae	Cantius	abditus	3	0	0	0	0	lm2, misc M
USGS	13545	D-1604	463	Primates	Notharctidae	Cantius	abditus	1	5.18	4.22	0	0	lm1-3
USGS	16563	D-1699	463	Primates	Notharctidae	Cantius	abditus	1	5.04	4.01	0	0	lp4-m3, rm3
USGS	16564	D-1699	463	Primates	Notharctidae	Cantius	abditus	8	5.18	4.18	0	0	lm1, misc teeth
USGS	16566	D-1699	463	Primates	Notharctidae	Cantius	abditus	1	0	0	4.9	3.9	rp4-m2
USGS	16567	D-1699	463	Primates	Notharctidae	Cantius	abditus	1	0	0	0	0	rp2-4
USGS	16568	D-1699	463	Primates	Notharctidae	Cantius	abditus	1	0	0	0	0	lm2-3
USGS	16569	D-1699	463	Primates	Notharctidae	Cantius	abditus	1	0	0	0	0	rm2-3
USGS	16577	D-1699	463	Primates	Notharctidae	Cantius	abditus	1	0	0	4.39	3.63	rp4-m3, rP4-M3
USGS	16578	D-1699	463	Primates	Notharctidae	Cantius	abditus	1	0	0	5.02	3.65	rp4-m3
USGS	16579	D-1699	463	Primates	Notharctidae	Cantius	abditus	1	0	0	0	0	rM1-3
USGS	16580	D-1699	463	Primates	Notharctidae	Cantius	abditus	1	0	0	0	0	l jaw frag
USGS	16583	D-1699	463	Primates	Notharctidae	Cantius	abditus	1	0	0	0	0	assoc uppers, frags, lm3
USGS	23688	D-1699	463	Primates	Notharctidae	Cantius	abditus	1	5.37	4.57	0	0	lp4-m1
USGS	23689	D-1699	463	Primates	Notharctidae	Cantius	abditus	1	0	0	0	0	lm2-3
USGS	23690	D-1699	463	Primates	Notharctidae	Cantius	abditus	1	0	0	0	0	lm2-3
USGS	23691	D-1699	463	Primates	Notharctidae	Cantius	abditus	1	4.92	4	0	0	lm1
USGS	23692	D-1699	463	Primates	Notharctidae	Cantius	abditus	1	4.82	3.67	0	0	lp4-m2
USGS	23693	D-1699	463	Primates	Notharctidae	Cantius	abditus	1	5.01	4.08	0	0	lm1-2
USGS	23694	D-1699	463	Primates	Notharctidae	Cantius	abditus	1	0	0	4.87	3.93	rp4-m3
USGS	23695	D-1699	463	Primates	Notharctidae	Cantius	abditus	1	0	0	5.03	4.12	rp4-m3
USGS	23696	D-1699	463	Primates	Notharctidae	Cantius	abditus	1	0	0	0	0	lm2-3
USGS	23697	D-1699	463	Primates	Notharctidae	Cantius	abditus	1	0	0	0	0	lM1-2
USGS	23698	D-1699	463	Primates	Notharctidae	Cantius	abditus	1	5.14	4.09	0	0	lp4-m3
USGS	23700	D-1699	463	Primates	Notharctidae	Cantius	abditus	1	0	0	0	0	rP2-M3
USGS	23702	D-1699	463	Primates	Notharctidae	Cantius	abditus	5	0	0	0	0	misc teeth
USGS	23766	D-1699	463	Primates	Notharctidae	Cantius	abditus	1	0	0	0	0	lM2-3
USGS	25775	D-1699	463	Primates	Notharctidae	Cantius	abditus	4	0	0	0	0	misc teeth and jaw frags
USGS	25996	D-1699	463	Primates	Notharctidae	Cantius	abditus	1	0	0	4.97	3.94	rm1-2
USGS	25997	D-1699	463	Primates	Notharctidae	Cantius	abditus	1	0	0	0	0	rm2
NMNH	522204	D-1699	463	Primates	Notharctidae	Cantius	abditus	6	0	0	0	0	lp4-m1lm1-2, rm2-3, 3m
USGS	23747	D-1776	463	Primates	Notharctidae	Cantius	abditus	1	0	0	5.15	3.91	rp3-m1
USGS	25777	D-1776	463	Primates	Notharctidae	Cantius	abditus	4	0	0	0	0	misc M
USGS	25778	D-1776	463	Primates	Notharctidae	Cantius	abditus	1	4.82	3.8	0	0	lp4-m2
USGS	25779	D-1776	463	Primates	Notharctidae	Cantius	abditus	1	0	0	0	0	rM1-3
USGS	25780	D-1776	463	Primates	Notharctidae	Cantius	abditus	1	0	0	0	0	lM2-3
USGS	25781	D-1776	463	Primates	Notharctidae	Cantius	abditus	1	0	0	5.08	4.05	rm1-3
USGS	25864	D-1776	463	Primates	Notharctidae	Cantius	abditus	2	0	0	0	0	rm, lm3
USGS	25959	D-1776	463	Primates	Notharctidae	Cantius	abditus	1	0	0	0	0	rp3-4
USGS	25960	D-1776	463	Primates	Notharctidae	Cantius	abditus	1	0	0	0	0	rP3-M3
USGS	25961	D-1776	463	Primates	Notharctidae	Cantius	abditus	1	0	0	0	0	rM2-3
USGS	25972	D-1776	463	Primates	Notharctidae	Cantius	abditus	2	0	0	5.22	4.17	rm1-2, jaw frag
USGS	27641	D-1776	463	Primates	Notharctidae	Cantius	abditus	1	0	0	0	0	rm3
USGS	27642	D-1776	463	Primates	Notharctidae	Cantius	abditus	1	0	0	0	0	lM1
USGS	25835	D-1833	463	Primates	Notharctidae	Cantius	abditus	3	0	0	0	0	lm2, misc M
USGS	25841	D-1833	463	Primates	Notharctidae	Cantius	abditus	1	4.97	3.8	0	0	lp4-m2
USGS	25856	D-1833	463	Primates	Notharctidae	Cantius	abditus	1	0	0	0	0	lm2-3
USGS	27168	D-1833	463	Primates	Notharctidae	Cantius	abditus	3	0	0	5.08	4.1	rm1, misc teeth
USGS	27225	D-1833	463	Primates	Notharctidae	Cantius	abditus	1	0	0	0	0	rP3-M3
USGS	27226	D-1833	463	Primates	Notharctidae	Cantius	abditus	1	0	0	0	0	lP2-M2, rM1-2, lp3-4
USGS	27227	D-1833	463	Primates	Notharctidae	Cantius	abditus	2	0	0	0	0	lM2's
USGS	27229	D-1833	463	Primates	Notharctidae	Cantius	abditus	1	0	0	0	0	lP4-M2
USGS	28080	D-1833	463	Primates	Notharctidae	Cantius	abditus	1	4.91	4.14	0	0	lm1-3
USGS	28081	D-1833	463	Primates	Notharctidae	Cantius	abditus	1	0	0	0	0	rm2-3
USGS	28082	D-1833	463	Primates	Notharctidae	Cantius	abditus	1	0	0	0	0	lm1-3, covered
USGS	28083	D-1833	463	Primates	Notharctidae	Cantius	abditus	1	4.73	4.66	0	0	lm1
USGS	28084	D-1833	463	Primates	Notharctidae	Cantius	abditus	1	0	0	5.11	3.97	rp4-m1
USGS	30031	D-1833	463	Primates	Notharctidae	Cantius	abditus	1	4.9	4.01	0	0	lp4-m2
USGS	30034	D-1833	463	Primates	Notharctidae	Cantius	abditus	1	5.03	4.26	0	0	lm1-3
USGS	30038	D-1833	463	Primates	Notharctidae	Cantius	abditus	1	0	0	0	0	rm2-3
USGS	30039	D-1833	463	Primates	Notharctidae	Cantius	abditus	1	0	0	0	0	lm2-3
USGS	30049	D-1833	463	Primates	Notharctidae	Cantius	abditus	1	5.08	4.26	0	0	lm1-2
USGS	30052	D-1833	463	Primates	Notharctidae	Cantius	abditus	1	0	0	0	0	lm2-3
USGS	30172	D-1833	463	Primates	Notharctidae	Cantius	abditus	1	4.84	3.94	0	0	lp4-m3
USGS	30177	D-1833	463	Primates	Notharctidae	Cantius	abditus	1	0	0	0	0	lP3-M2, rP4
USGS	30204	D-1833	463	Primates	Notharctidae	Cantius	abditus	1	0	0	0	0	lP4, lM2-3
USGS	30212	D-1833	463	Primates	Notharctidae	Cantius	abditus	1	0	0	4.96	4.03	rm1-3, rM1-2, c
USGS	30225	D-1833	463	Primates	Notharctidae	Cantius	abditus	3	0	0	4.76	3.97	rp4-m1, misc bits
USGS	30301	D-1833	463	Primates	Notharctidae	Cantius	abditus	2	4.83	4.01	0	0	lm1, M
USGS	38005	D-1833	463	Primates	Notharctidae	Cantius	abditus	1	0	0	0	0	rp4
USGS	27192	D-1881	463	Primates	Notharctidae	Cantius	abditus	1	0	0	0	0	lp4, lm2-3
USGS	27203	D-1881	463	Primates	Notharctidae	Cantius	abditus	1	0	0	0	0	rm2-3
USGS	30140	D-1881	463	Primates	Notharctidae	Cantius	abditus	1	0	0	0	0	lP4
USGS	30147	D-1881	463	Primates	Notharctidae	Cantius	abditus	1	4.75	3.89	0	0	lp4-m3
USGS	27167	D-1890	463	Primates	Notharctidae	Cantius	abditus	1	0	0	0	0	lM1-2
USGS	7215	D-1495	464	Primates	Notharctidae	Cantius	abditus	1	0	0	4.79	3.81	rm1-3
USGS	7216	D-1495	464	Primates	Notharctidae	Cantius	abditus	2	0	0	0	0	misc jaw frags
USGS	7217	D-1495	464	Primates	Notharctidae	Cantius	abditus	1	0	0	5.29	4	rm1-2
USGS	7249	D-1495	464	Primates	Notharctidae	Cantius	abditus	2	4.71	4.31	5.16	4.34	lp4-m3, rp3-m3
USGS	7302	D-1495	464	Primates	Notharctidae	Cantius	abditus	1	0	0	0	0	assoc uppers and bones
USGS	9685	D-1495	464	Primates	Notharctidae	Cantius	abditus	1	0	0	5.09	4.03	rp4-m3
USGS	9794	D-1495	464	Primates	Notharctidae	Cantius	abditus	1	0	0	0	0	rm2-3
USGS	9797	D-1495	464	Primates	Notharctidae	Cantius	abditus	1	5.15	4.19	0	0	lm1-2
USGS	9798	D-1495	464	Primates	Notharctidae	Cantius	abditus	7	0	0	0	0	misc teeth
NMNH	490646	D-1676	464	Primates	Notharctidae	Cantius	abditus	2	0	0	0	0	lp3, m1-3, rp3-m2
NMNH	509665	D-1676	464	Primates	Notharctidae	Cantius	abditus	1	0	0	0	0	lp4-m1
NMNH	509666	D-1676	464	Primates	Notharctidae	Cantius	abditus	1	0	0	0	0	rM1-3
USGS	10051	D-1425	465	Primates	Notharctidae	Cantius	abditus	3	0	0	0	0	misc teeth
USGS	16637	D-1668/1669/1670	465	Primates	Notharctidae	Cantius	abditus	1	0	0	0	0	lp1-4, rm2-3
USGS	16638	D-1668/1669/1670	465	Primates	Notharctidae	Cantius	abditus	1	4.89	3.98	0	0	lp3-m1
USGS	13601	D-1592	466	Primates	Notharctidae	Cantius	abditus	1	0	0	0	0	lp3-4
USGS	23706	D-1737	466	Primates	Notharctidae	Cantius	abditus	1	5.17	4.24	0	0	lm1-2
USGS	23709	D-1737	466	Primates	Notharctidae	Cantius	abditus	1	0	0	0	0	lm2-3
USGS	23710	D-1737	466	Primates	Notharctidae	Cantius	abditus	1	0	0	0	0	lM1-3
USGS	23711	D-1737	466	Primates	Notharctidae	Cantius	abditus	1	0	0	5.01	4.05	rm1-2
USGS	23712	D-1737	466	Primates	Notharctidae	Cantius	abditus	1	0	0	0	0	lP4-M3
USGS	23714	D-1737	466	Primates	Notharctidae	Cantius	abditus	1	0	0	0	0	jaw frag
USGS	23715	D-1737	466	Primates	Notharctidae	Cantius	abditus	1	0	0	0	0	lm3
USGS	23716	D-1737	466	Primates	Notharctidae	Cantius	abditus	2	0	0	0	0	misc
USGS	23718	D-1737	466	Primates	Notharctidae	Cantius	abditus	1	4.8	3.6	0	0	lp4-m3
USGS	23721	D-1737	466	Primates	Notharctidae	Cantius	abditus	1	5.4	4.33	0	0	lm1-2
USGS	23772	D-1737	466	Primates	Notharctidae	Cantius	abditus	1	0	0	0	0	lp3-m3
USGS	25877	D-1737	466	Primates	Notharctidae	Cantius	abditus	1	0	0	0	0	lP4-M3
USGS	26005	D-1737	466	Primates	Notharctidae	Cantius	abditus	1	0	0	0	0	rM
USGS	26006	D-1737	466	Primates	Notharctidae	Cantius	abditus	2	0	0	0	0	r and lm2
USGS	28783	D-1737	466	Primates	Notharctidae	Cantius	abditus	1	0	0	0	0	lm3
NMNH	23734A	D-1737	466	Primates	Notharctidae	Cantius	abditus	1	0	0	0	0	lp4-m2
USGS	30264	D-1999	467	Primates	Notharctidae	Cantius	abditus	1	4.83	3.97	0	0	lp4-m3
USGS	25869	D-1757	468	Primates	Notharctidae	Cantius	abditus	1	0	0	0	0	lm3
USGS	4429	D-1160/1314	470	Primates	Notharctidae	Cantius	abditus	1	0	0	0	0	lm2-3
USGS	4430	D-1160/1314	470	Primates	Notharctidae	Cantius	abditus	1	0	0	0	0	rP4-M2
USGS	4432	D-1160/1314	470	Primates	Notharctidae	Cantius	abditus	1	0	0	4.96	3.84	rm1-3
USGS	4433	D-1160/1314	470	Primates	Notharctidae	Cantius	abditus	1	0	0	0	0	lm1-3, broken
USGS	4435	D-1160/1314	470	Primates	Notharctidae	Cantius	abditus	1	0	0	0	0	rp3-4
USGS	4436	D-1160/1314	470	Primates	Notharctidae	Cantius	abditus	1	0	0	5.06	3.51	rm1-2
USGS	4437	D-1160/1314	470	Primates	Notharctidae	Cantius	abditus	1	0	0	0	0	rP4
USGS	6328	D-1160/1314	470	Primates	Notharctidae	Cantius	abditus	3	0	0	4.73	3.86	rp4-m3, r P4-M3, lP3-M1
USGS	6337	D-1160/1314	470	Primates	Notharctidae	Cantius	abditus	3	0	0	0	0	rM1-3, m frags
USGS	38033	D-1160/1314	470	Primates	Notharctidae	Cantius	abditus	2	0	0	0	0	lP3-M2, lM2-3
NMNH	522205	D-1160/1314	470	Primates	Notharctidae	Cantius	abditus	1	0	0	0	0	r and l palates, broken teeth
NMNH	522206	D-1160/1314	470	Primates	Notharctidae	Cantius	abditus	1	0	0	0	0	rP3, M1-3
NMNH	522208	D-1160/1314	470	Primates	Notharctidae	Cantius	abditus	8	0	0	0	0	misc jaws
NMNH	540328	D-1160/1314	470	Primates	Notharctidae	Cantius	abditus	1	5.02	4.01			L dentary with p3-m2
NMNH	540358	D-1160/1314	470	Primates	Notharctidae	Cantius	abditus	1					R dentary with p3-4
NMNH	540361	D-1160/1314	470	Primates	Notharctidae	Cantius	abditus	1					L dentary with p4-m1 (broken)
NMNH	540362	D-1160/1314	470	Primates	Notharctidae	Cantius	abditus	1					L dentary with m2-3
NMNH	540363	D-1160/1314	470	Primates	Notharctidae	Cantius	abditus	1					L dentary with m3
NMNH	540431	D-1160/1314	470	Primates	Notharctidae	Cantius	abditus	1	5.03	4.13	5.03	4.35	R dentary with m1-2, L dentary with m1, assoc
NMNH	540459	D-1160/1314	470	Primates	Notharctidae	Cantius	abditus	1	4.97	3.95			L dentary with m1-2, R max with M1-2, assoc?
USGS	456	D-1244	470	Primates	Notharctidae	Cantius	abditus	1	0	0	4.95	4.2	rm1-2
USGS	5384	D-1244	470	Primates	Notharctidae	Cantius	abditus	1	0	0	5.07	3.71	rm1
USGS	402	Y-45	470	Primates	Notharctidae	Cantius	abditus	1	5.21	4	0	0	lm1-3
USGS	403	Y-45	470	Primates	Notharctidae	Cantius	abditus	1	5.22	4.06	0	0	lp3-m1
USGS	427	Y-45	470	Primates	Notharctidae	Cantius	abditus	1	0	0	0	0	rm2-3
USGS	462	Y-45	470	Primates	Notharctidae	Cantius	abditus	1	5.21	4	0	0	lm1-2
USGS	1098	Y-45	470	Primates	Notharctidae	Cantius	abditus	1	0	0	0	0	lm2
USGS	1101	Y-45	470	Primates	Notharctidae	Cantius	abditus	1	0	0	4.83	4.14	rp2-3, rm1-2
USGS	1102	Y-45	470	Primates	Notharctidae	Cantius	abditus	1	0	0	0	0	lM2-3
USGS	1103	Y-45	470	Primates	Notharctidae	Cantius	abditus	1	0	0	0	0	rP4-M3
USGS	1213	Y-45	470	Primates	Notharctidae	Cantius	abditus	2	0	0	0	0	2lM1
USGS	1249	Y-45	470	Primates	Notharctidae	Cantius	abditus	1	0	0	0	0	rm2-3
USGS	1250	Y-45	470	Primates	Notharctidae	Cantius	abditus	1	0	0	0	0	rm3
USGS	1251	Y-45	470	Primates	Notharctidae	Cantius	abditus	2	0	0	5.31	4.09	rm1, rm2
USGS	1258	Y-45	470	Primates	Notharctidae	Cantius	abditus	2	0	0	5.26	4.43	lp4, rm1
USGS	1303	Y-45	470	Primates	Notharctidae	Cantius	abditus	1	0	0	0	0	lm2-3
USGS	1304	Y-45	470	Primates	Notharctidae	Cantius	abditus	1	0	0	0	0	rM3
USGS	1324	Y-45	470	Primates	Notharctidae	Cantius	abditus	1	0	0	4.74	3.97	rm1-3
USGS	1325	Y-45	470	Primates	Notharctidae	Cantius	abditus	1	4.89	3.9	0	0	lp3-m2
USGS	1326	Y-45	470	Primates	Notharctidae	Cantius	abditus	1	0	0	0	0	lM3
USGS	1327	Y-45	470	Primates	Notharctidae	Cantius	abditus	1	0	0	0	0	lm2-3
USGS	4471	Y-45	470	Primates	Notharctidae	Cantius	abditus	1	0	0	0	0	rm2-3
USGS	4496	Y-45	470	Primates	Notharctidae	Cantius	abditus	1	0	0	5.02	4.36	rm1-3
USGS	6008	Y-45	470	Primates	Notharctidae	Cantius	abditus	1	0	0	0	0	assoc uppers
USGS	6012	Y-45	470	Primates	Notharctidae	Cantius	abditus	1	0	0	5.05	4.17	rp3-m2
USGS	6014	Y-45	470	Primates	Notharctidae	Cantius	abditus	1	4.85	3.89	0	0	lp4-m2
USGS	6015	Y-45	470	Primates	Notharctidae	Cantius	abditus	1	0	0	0	0	rm3
USGS	6016	Y-45	470	Primates	Notharctidae	Cantius	abditus	1	4.88	3.98	0	0	lm1
USGS	6017	Y-45	470	Primates	Notharctidae	Cantius	abditus	1	0	0	0	0	lm3
USGS	6018	Y-45	470	Primates	Notharctidae	Cantius	abditus	1	0	0	0	0	lp4
USGS	6020	Y-45	470	Primates	Notharctidae	Cantius	abditus	1	5.14	3.85	0	0	lm1
USGS	6021	Y-45	470	Primates	Notharctidae	Cantius	abditus	2	0	0	0	0	M frags
USGS	6022	Y-45	470	Primates	Notharctidae	Cantius	abditus	1	5.03	4.01	0	0	lm1
USGS	6024	Y-45	470	Primates	Notharctidae	Cantius	abditus	1	5	4.03	0	0	lm1
USGS	6102	Y-45	470	Primates	Notharctidae	Cantius	abditus	1	5.24	4.14	0	0	lm1-3
USGS	6103	Y-45	470	Primates	Notharctidae	Cantius	abditus	1	0	0	0	0	lp4
USGS	6104	Y-45	470	Primates	Notharctidae	Cantius	abditus	1	0	0	0	0	rM2
USGS	8259	Y-45	470	Primates	Notharctidae	Cantius	abditus	1	0	0	0	0	lM3
USGS	8904	Y-45	470	Primates	Notharctidae	Cantius	abditus	1	0	0	0	0	rM3
USGS	9056	Y-45	470	Primates	Notharctidae	Cantius	abditus	1	0	0	0	0	lM1
USGS	9349	Y-45	470	Primates	Notharctidae	Cantius	abditus	1	0	0	0	0	lp3
USGS	13563	Y-45	470	Primates	Notharctidae	Cantius	abditus	1	0	0	0	0	lm3
USGS	13632	Y-45	470	Primates	Notharctidae	Cantius	abditus	3	0	0	0	0	rm2, lM1, lM3
USGS	13735	Y-45	470	Primates	Notharctidae	Cantius	abditus	1	5.13	4.16	0	0	lm1-3
USGS	13739	Y-45	470	Primates	Notharctidae	Cantius	abditus	1	0	0	0	0	rP4-M3
USGS	25178	Y-45	470	Primates	Notharctidae	Cantius	abditus	3	0	0	5.05	4.38	rm1-3, rp3-4, lM2
USGS	27198	Y-45	470	Primates	Notharctidae	Cantius	abditus	1	0	0	0	0	l-P4
NMNH	509629	Y-45	470	Primates	Notharctidae	Cantius	abditus	1	0	0	0	0	lp4-m3
NMNH	522210	Y-45	470	Primates	Notharctidae	Cantius	abditus	5	0	0	0	0	lp3-m3, rm2, 2M, lP3-M3
NMNH	540663	Y-45	470	Primates	Notharctidae	Cantius	abditus	1			5.13	4.34	R dentary with p4-m2
NMNH	540664	Y-45	470	Primates	Notharctidae	Cantius	abditus	1			4.46	3.92	R dentary with p2-m2
NMNH	541698	Y-45	470	Primates	Notharctidae	Cantius	abditus	1					L max with M1-3
NMNH	541699	Y-45	470	Primates	Notharctidae	Cantius	abditus	1					L m2
NMNH	1098-dup	Y-45	470	Primates	Notharctidae	Cantius	abditus	6	0	0	0	0	misc teeth
USGS	25782	D-1777	474	Primates	Notharctidae	Cantius	abditus	1	0	0	0	0	lM2-3
USGS	25783	D-1777	474	Primates	Notharctidae	Cantius	abditus	3	5.01	4.33	0	0	lm1, rm2, rm3
USGS	25998	D-1777	474	Primates	Notharctidae	Cantius	abditus	1	5.21	3.88	0	0	lm1-2
USGS	25999	D-1777	474	Primates	Notharctidae	Cantius	abditus	1	0	0	0	0	jaw frag
USGS	26016	D-1778	474	Primates	Notharctidae	Cantius	abditus	1	0	0	0	0	rm2
USGS	13585	D-1617	475	Primates	Notharctidae	Cantius	abditus	1	5.14	4.13	0	0	lm1-2
USGS	1789	D-1164	476	Primates	Notharctidae	Cantius	abditus	1	0	0	0	0	lM1-3
USGS	1790	D-1164	476	Primates	Notharctidae	Cantius	abditus	1	0	0	0	0	rP3-M2
USGS	1791	D-1164	476	Primates	Notharctidae	Cantius	abditus	1	0	0	0	0	rM2
USGS	7221	D-1511	478	Primates	Notharctidae	Cantius	abditus	1	0	0	0	0	rm2-3
USGS	7222	D-1511	478	Primates	Notharctidae	Cantius	abditus	1	0	0	0	0	lP4-M2
USGS	7278	D-1511	478	Primates	Notharctidae	Cantius	abditus	1	0	0	0	0	rm2-3
USGS	7282	D-1511	478	Primates	Notharctidae	Cantius	abditus	1	0	0	0	0	lp3-4
USGS	7283	D-1511	478	Primates	Notharctidae	Cantius	abditus	4	0	0	0	0	lm2, rm1, M, jaw frags
USGS	25930	D-1511	478	Primates	Notharctidae	Cantius	abditus	1	0	0	0	0	lp4
USGS	25932	D-1511	478	Primates	Notharctidae	Cantius	abditus	1	0	0	0	0	lm2
USGS	25933	D-1511	478	Primates	Notharctidae	Cantius	abditus	1	0	0	0	0	lM2-3
USGS	25949	D-1511	478	Primates	Notharctidae	Cantius	abditus	1	0	0	4.56	3.64	rp4-m1
NMNH	541787	D-1511	478	Primates	Notharctidae	Cantius	abditus	1					L m1-2
USGS	13606	D-1605	478	Primates	Notharctidae	Cantius	abditus	1	0	0	0	0	lm2
USGS	38055	D-1605	478	Primates	Notharctidae	Cantius	abditus	2	5.04	4.22	0	0	lm1-3, rm3
USGS	18373	D-1727	478	Primates	Notharctidae	Cantius	abditus	1	0	0	0	0	lP4-M3
USGS	18374	D-1727	478	Primates	Notharctidae	Cantius	abditus	1	0	0	0	0	lm2
USGS	18377	D-1727	478	Primates	Notharctidae	Cantius	abditus	1	4.92	4.1	0	0	lp4-m2
USGS	18378	D-1727	478	Primates	Notharctidae	Cantius	abditus	1	0	0	0	0	rM1-3
USGS	18380	D-1727	478	Primates	Notharctidae	Cantius	abditus	1	5.21	4.3	0	0	lm1-3
USGS	18381	D-1727	478	Primates	Notharctidae	Cantius	abditus	2	0	0	0	0	2 x c
USGS	18382	D-1727	478	Primates	Notharctidae	Cantius	abditus	1	0	0	0	0	lm2
USGS	23703	D-1727	478	Primates	Notharctidae	Cantius	abditus	2	0	0	0	0	m frags
USGS	26004	D-1727	478	Primates	Notharctidae	Cantius	abditus	1	4.95	3.9	0	0	lm1-2
USGS	30238	D-2003	479	Primates	Notharctidae	Cantius	abditus	1	0	0	0	0	lm2-3
USGS	30246	D-2003	479	Primates	Notharctidae	Cantius	abditus	1	0	0	5.09	3.99	rp4-m1
USGS	30249	D-2003	479	Primates	Notharctidae	Cantius	abditus	1	0	0	0	0	lp3
USGS	30250	D-2003	479	Primates	Notharctidae	Cantius	abditus	3	0	0	0	0	M, m frags
USGS	30259	D-2003	479	Primates	Notharctidae	Cantius	abditus	1	0	0	0	0	rp1-4
USGS	30282	D-2003	479	Primates	Notharctidae	Cantius	abditus	2	0	0	0	0	p frags
USGS	970	D-1162	481	Primates	Notharctidae	Cantius	abditus	2	5.23	3.91	5.3	4.41	lm1-3, rp4-m3
USGS	994	D-1162	481	Primates	Notharctidae	Cantius	abditus	1	0	0	0	0	lm2
USGS	996	D-1162	481	Primates	Notharctidae	Cantius	abditus	1	5.15	3.58	0	0	lm1-2
USGS	997	D-1162	481	Primates	Notharctidae	Cantius	abditus	1	0	0	0	0	rm3
USGS	998	D-1162	481	Primates	Notharctidae	Cantius	abditus	1	4.74	4.21	0	0	lm1-3
USGS	1000	D-1162	481	Primates	Notharctidae	Cantius	abditus	1	0	0	0	0	rm2-3
USGS	1001	D-1162	481	Primates	Notharctidae	Cantius	abditus	1	0	0	0	0	lm2-3
USGS	1002	D-1162	481	Primates	Notharctidae	Cantius	abditus	1	4.89	3.99	0	0	lp3-m1
USGS	1003	D-1162	481	Primates	Notharctidae	Cantius	abditus	1	0	0	4.9	4.05	rm1-3
USGS	1004	D-1162	481	Primates	Notharctidae	Cantius	abditus	1	0	0	0	0	lm3
USGS	1005	D-1162	481	Primates	Notharctidae	Cantius	abditus	1	0	0	0	0	rm2 frag
USGS	1023	D-1162	481	Primates	Notharctidae	Cantius	abditus	1	5	3.89	0	0	lp4-m1
USGS	4440	D-1162	481	Primates	Notharctidae	Cantius	abditus	1	5.1	3.93	0	0	lm1-2
USGS	4442	D-1162	481	Primates	Notharctidae	Cantius	abditus	1	0	0	0	0	rm3
USGS	4443	D-1162	481	Primates	Notharctidae	Cantius	abditus	1	0	0	0	0	lP3-M3
USGS	4445	D-1162	481	Primates	Notharctidae	Cantius	abditus	1	0	0	0	0	lM1-3
USGS	4446	D-1162	481	Primates	Notharctidae	Cantius	abditus	1	0	0	0	0	rp2-3
USGS	4447	D-1162	481	Primates	Notharctidae	Cantius	abditus	2	0	0	0	0	r and lm3
USGS	4604	D-1162	481	Primates	Notharctidae	Cantius	abditus	1	0	0	4.93	3.86	rm1-3
USGS	8301	D-1162	481	Primates	Notharctidae	Cantius	abditus	1	5.07	4.05	0	0	lm1-3
USGS	8302	D-1162	481	Primates	Notharctidae	Cantius	abditus	1	4.91	3.96	0	0	lm1-2
USGS	8303	D-1162	481	Primates	Notharctidae	Cantius	abditus	1	0	0	0	0	rm2
USGS	9293	D-1162	481	Primates	Notharctidae	Cantius	abditus	1	0	0	0	0	rm2
USGS	9294	D-1162	481	Primates	Notharctidae	Cantius	abditus	1	0	0	4.72	3.92	rp3-m1
USGS	9295	D-1162	481	Primates	Notharctidae	Cantius	abditus	1	0	0	5.1	4.25	rp4-m2
USGS	9296	D-1162	481	Primates	Notharctidae	Cantius	abditus	1	0	0	0	0	lP3-4
USGS	9297	D-1162	481	Primates	Notharctidae	Cantius	abditus	6	5.01	3.96	0	0	6 misc m, incl lm1
USGS	23729	D-1162	481	Primates	Notharctidae	Cantius	abditus	1	0	0	0	0	rm3
USGS	30040	D-1162	481	Primates	Notharctidae	Cantius	abditus	1	0	0	0	0	lm3
USGS	38051	D-1162	481	Primates	Notharctidae	Cantius	abditus	1	5.1	4.27	0	0	lp4-m1
USGS	38052	D-1162	481	Primates	Notharctidae	Cantius	abditus	1	0	0	4.85	3.94	rm1-2
USGS	367	D-1177	481	Primates	Notharctidae	Cantius	abditus	1	5.16	4.3	0	0	lp3-m1
USGS	368	D-1177	481	Primates	Notharctidae	Cantius	abditus	1	0	0	4.97	3.96	rm1
USGS	393	D-1177	481	Primates	Notharctidae	Cantius	abditus	1	0	0	0	0	rm2
USGS	395	D-1177	481	Primates	Notharctidae	Cantius	abditus	1	0	0	0	0	lm2
USGS	396	D-1177	481	Primates	Notharctidae	Cantius	abditus	1	0	0	0	0	lm3
USGS	404	D-1177	481	Primates	Notharctidae	Cantius	abditus	1	0	0	0	0	lm2-3
USGS	405	D-1177	481	Primates	Notharctidae	Cantius	abditus	1	0	0	0	0	rm2-3
USGS	407	D-1177	481	Primates	Notharctidae	Cantius	abditus	1	0	0	0	0	rm2
USGS	408	D-1177	481	Primates	Notharctidae	Cantius	abditus	1	0	0	0	0	lm2
USGS	411	D-1177	481	Primates	Notharctidae	Cantius	abditus	1	0	0	0	0	lP4-M3
USGS	414	D-1177	481	Primates	Notharctidae	Cantius	abditus	1	0	0	0	0	lm2
USGS	415	D-1177	481	Primates	Notharctidae	Cantius	abditus	1	0	0	0	0	rm1-3
USGS	449	D-1177	481	Primates	Notharctidae	Cantius	abditus	1	0	0	0	0	jaw frag
USGS	450	D-1177	481	Primates	Notharctidae	Cantius	abditus	1	0	0	4.86	4.17	rp4-m2 (m1 broken)
USGS	451	D-1177	481	Primates	Notharctidae	Cantius	abditus	1	0	0	5.11	3.89	rp4-m2
USGS	452	D-1177	481	Primates	Notharctidae	Cantius	abditus	1	0	0	5.06	4.06	rp4-m1
USGS	458	D-1177	481	Primates	Notharctidae	Cantius	abditus	1	0	0	0	0	rM1-3
USGS	459	D-1177	481	Primates	Notharctidae	Cantius	abditus	1	4.96	3.9	0	0	lp4-m1
USGS	460	D-1177	481	Primates	Notharctidae	Cantius	abditus	1	0	0	0	0	lm2-3
USGS	8457	D-1177	481	Primates	Notharctidae	Cantius	abditus	1	0	0	0	0	lm3
USGS	27682	D-1177	481	Primates	Notharctidae	Cantius	abditus	1	0	0	0	0	lm2-3
USGS	27683	D-1177	481	Primates	Notharctidae	Cantius	abditus	1	0	0	0	0	lm2
USGS	27684	D-1177	481	Primates	Notharctidae	Cantius	abditus	1	4.8	4.01	0	0	lm1-2
USGS	27687	D-1177	481	Primates	Notharctidae	Cantius	abditus	1	0	0	0	0	lm2-3
USGS	27695	D-1177	481	Primates	Notharctidae	Cantius	abditus	1	0	0	0	0	rm2-3
USGS	27696	D-1177	481	Primates	Notharctidae	Cantius	abditus	1	0	0	0	0	jaw frag
USGS	27697	D-1177	481	Primates	Notharctidae	Cantius	abditus	1	0	0	0	0	covered jaw
USGS	27700	D-1177	481	Primates	Notharctidae	Cantius	abditus	1	0	0	0	0	rm2
NMNH	522211	D-1177	481	Primates	Notharctidae	Cantius	abditus	8	0	0	0	0	misc teeth and jaws, postcrania
NMNH	522213	D-1177	481	Primates	Notharctidae	Cantius	abditus	2	0	0	0	0	rp4-m1, rm2
NMNH	540349	D-1177	481	Primates	Notharctidae	Cantius	abditus	1	5.45	4.44			L dentary with p4-m2
NMNH	540356	D-1177	481	Primates	Notharctidae	Cantius	abditus	1	4.97	4.22			L dentary with p4-m3
NMNH	540357	D-1177	481	Primates	Notharctidae	Cantius	abditus	1			5.27	4.15	R dentary with m1-2
USGS	442	D-1197	481	Primates	Notharctidae	Cantius	abditus	1	0	0	4.72	4.06	rm1-2
USGS	8560	D-1197	481	Primates	Notharctidae	Cantius	abditus	2	0	0	0	0	2 lm3
USGS	8561	D-1197	481	Primates	Notharctidae	Cantius	abditus	1	0	0	4.9	4.22	rm1-3
USGS	8562	D-1197	481	Primates	Notharctidae	Cantius	abditus	1	0	0	4.85	3.94	rm1-2
USGS	1479	D-1229	481	Primates	Notharctidae	Cantius	abditus	2	0	0	0	0	rM1-2, lP4-M2
USGS	1480	D-1229	481	Primates	Notharctidae	Cantius	abditus	1	5.19	3.84	0	0	lp4-m3
USGS	1481	D-1229	481	Primates	Notharctidae	Cantius	abditus	2	0	0	0	0	2 M
USGS	1482	D-1229	481	Primates	Notharctidae	Cantius	abditus	1	0	0	0	0	rp3-m1 (m1 broken)
USGS	1483	D-1229	481	Primates	Notharctidae	Cantius	abditus	1	0	0	4.92	3.96	rp4-m2
USGS	1484	D-1229	481	Primates	Notharctidae	Cantius	abditus	1	0	0	0	0	lm2-3
USGS	1485	D-1229	481	Primates	Notharctidae	Cantius	abditus	1	0	0	0	0	lm2-3
USGS	1486	D-1229	481	Primates	Notharctidae	Cantius	abditus	1	0	0	5.18	4.25	rm1-3
USGS	1487	D-1229	481	Primates	Notharctidae	Cantius	abditus	1	0	0	0	0	lM2-3
USGS	4593	D-1229	481	Primates	Notharctidae	Cantius	abditus	1	0	0	5.01	4.02	rp4-m3
USGS	8760	D-1229	481	Primates	Notharctidae	Cantius	abditus	1	0	0	4.96	3.83	rm1-3
USGS	4630	D-1316	481	Primates	Notharctidae	Cantius	abditus	1	0	0	0	0	lm2
USGS	4631	D-1316	481	Primates	Notharctidae	Cantius	abditus	2	5.03	3.66	5.19	3.84	r and lm1
USGS	4633	D-1316	481	Primates	Notharctidae	Cantius	abditus	1	0	0	0	0	lm1-2 (broken)
USGS	4634	D-1316	481	Primates	Notharctidae	Cantius	abditus	1	0	0	0	0	lm2-3
USGS	4635	D-1316	481	Primates	Notharctidae	Cantius	abditus	1	0	0	5.09	4.15	rm1, rm3
USGS	4636	D-1316	481	Primates	Notharctidae	Cantius	abditus	1	0	0	0	0	rm2-3
USGS	4637	D-1316	481	Primates	Notharctidae	Cantius	abditus	1	4.79	4.04	0	0	lm1-2
USGS	4638	D-1316	481	Primates	Notharctidae	Cantius	abditus	1	4.93	4.25	0	0	lp3-m1
USGS	4639	D-1316	481	Primates	Notharctidae	Cantius	abditus	1	0	0	0	0	jaw frag
USGS	4640	D-1316	481	Primates	Notharctidae	Cantius	abditus	1	0	0	0	0	lM1
USGS	10081	D-1316	481	Primates	Notharctidae	Cantius	abditus	3	5.14	3.94	0	0	lm1, rm3
NMNH	522214	D-1316	481	Primates	Notharctidae	Cantius	abditus	1	0	0	0	0	rm2
NMNH	540200	D-1316	481	Primates	Notharctidae	Cantius	abditus	1					incisor
NMNH	540446	D-1316	481	Primates	Notharctidae	Cantius	abditus	1					L dentary with m1-3
NMNH	540447	D-1316	481	Primates	Notharctidae	Cantius	abditus	1					R dentary with m2, m3 trigonid
USGS	4474	D-1336	481	Primates	Notharctidae	Cantius	abditus	1	0	0	0	0	rm2
USGS	7524	D-1510	482	Primates	Notharctidae	Cantius	abditus	1	0	0	4.61	4.01	rp3-m1
USGS	9480	D-1510	482	Primates	Notharctidae	Cantius	abditus	1	0	0	5.3	4.08	rp4-m1
USGS	9481	D-1510	482	Primates	Notharctidae	Cantius	abditus	1	0	0	0	0	lM1-3
USGS	9482	D-1510	482	Primates	Notharctidae	Cantius	abditus	1	0	0	5.14	4.24	rm1-3
USGS	9483	D-1510	482	Primates	Notharctidae	Cantius	abditus	1	0	0	0	0	lM1-2
USGS	9484	D-1510	482	Primates	Notharctidae	Cantius	abditus	1	5.33	4.08	0	0	lp4-m3
USGS	9487	D-1510	482	Primates	Notharctidae	Cantius	abditus	1	0	0	4.92	4.18	rm1-3
USGS	9488	D-1510	482	Primates	Notharctidae	Cantius	abditus	1	0	0	4.7	3.79	rp3-m2
USGS	9489	D-1510	482	Primates	Notharctidae	Cantius	abditus	1	0	0	5.05	3.72	rp3-m3
USGS	9490	D-1510	482	Primates	Notharctidae	Cantius	abditus	1	5.26	4.2	0	0	lp4-m2
USGS	9493	D-1510	482	Primates	Notharctidae	Cantius	abditus	1	0	0	0	0	rp3-4
USGS	9494	D-1510	482	Primates	Notharctidae	Cantius	abditus	1	5.06	4.01	0	0	lm1-2
USGS	9501	D-1510	482	Primates	Notharctidae	Cantius	abditus	1	0	0	0	0	lM2-3
USGS	9502	D-1510	482	Primates	Notharctidae	Cantius	abditus	1	0	0	0	0	lp3-4
USGS	9503	D-1510	482	Primates	Notharctidae	Cantius	abditus	1	0	0	0	0	rP4-M3
USGS	9504	D-1510	482	Primates	Notharctidae	Cantius	abditus	1	0	0	0	0	rP3-M2
USGS	9505	D-1510	482	Primates	Notharctidae	Cantius	abditus	1	4.94	3.99	0	0	lp3-m1
USGS	9508	D-1510	482	Primates	Notharctidae	Cantius	abditus	1	4.8	3.62	0	0	lp4-m2
USGS	9509	D-1510	482	Primates	Notharctidae	Cantius	abditus	1	5.27	4.14	0	0	lp3-m1
USGS	9510	D-1510	482	Primates	Notharctidae	Cantius	abditus	1	0	0	0	0	jaw frag
USGS	9511	D-1510	482	Primates	Notharctidae	Cantius	abditus	1	0	0	0	0	rp3-4
USGS	9512	D-1510	482	Primates	Notharctidae	Cantius	abditus	1	0	0	0	0	lm2-3
USGS	9514	D-1510	482	Primates	Notharctidae	Cantius	abditus	1	5.1	3.9	0	0	lp3-m3
USGS	9515	D-1510	482	Primates	Notharctidae	Cantius	abditus	1	0	0	4.81	4.07	rp3-m2
USGS	9521	D-1510	482	Primates	Notharctidae	Cantius	abditus	1	4.59	3.73	0	0	lp2-m1
USGS	9523	D-1510	482	Primates	Notharctidae	Cantius	abditus	1	0	0	0	0	rp2-3
USGS	9526	D-1510	482	Primates	Notharctidae	Cantius	abditus	1	0	0	0	0	lm3
USGS	9527	D-1510	482	Primates	Notharctidae	Cantius	abditus	1	0	0	0	0	lm2-3
USGS	9528	D-1510	482	Primates	Notharctidae	Cantius	abditus	1	0	0	4.86	3.82	lm1-2
USGS	9529	D-1510	482	Primates	Notharctidae	Cantius	abditus	1	0	0	0	0	m frag
USGS	9530	D-1510	482	Primates	Notharctidae	Cantius	abditus	1	0	0	0	0	rp2-m2 (m1 broken)
USGS	9533	D-1510	482	Primates	Notharctidae	Cantius	abditus	1	0	0	4.83	3.99	rm1-3
USGS	9534	D-1510	482	Primates	Notharctidae	Cantius	abditus	1	0	0	0	0	rP3-M3
USGS	9536	D-1510	482	Primates	Notharctidae	Cantius	abditus	1	0	0	0	0	rP3-M2
USGS	9538	D-1510	482	Primates	Notharctidae	Cantius	abditus	1	0	0	0	0	rM1
USGS	9540	D-1510	482	Primates	Notharctidae	Cantius	abditus	13	0	0	0	0	misc M
USGS	10089	D-1510	482	Primates	Notharctidae	Cantius	abditus	1	5.1	4.03	0	0	lp4-m2
USGS	10092	D-1510	482	Primates	Notharctidae	Cantius	abditus	1	4.94	4.28	0	0	lm1-3
USGS	10093	D-1510	482	Primates	Notharctidae	Cantius	abditus	1	4.68	3.9	0	0	lp3-m2
USGS	10094	D-1510	482	Primates	Notharctidae	Cantius	abditus	1	0	0	5.2	3.99	rm1-3
USGS	10096	D-1510	482	Primates	Notharctidae	Cantius	abditus	1	4.86	3.85	0	0	lp4-m1
USGS	10098	D-1510	482	Primates	Notharctidae	Cantius	abditus	1	0	0	0	0	rm2-3
USGS	10100	D-1510	482	Primates	Notharctidae	Cantius	abditus	1	0	0	0	0	lm2-3
USGS	10101	D-1510	482	Primates	Notharctidae	Cantius	abditus	1	0	0	0	0	lm2-3
USGS	10103	D-1510	482	Primates	Notharctidae	Cantius	abditus	1	0	0	4.75	4.13	rp3-m1
USGS	10104	D-1510	482	Primates	Notharctidae	Cantius	abditus	1	0	0	0	0	jaw frag
USGS	10105	D-1510	482	Primates	Notharctidae	Cantius	abditus	1	0	0	0	0	rp4-m2 (covered)
USGS	10106	D-1510	482	Primates	Notharctidae	Cantius	abditus	1	0	0	0	0	rp3-4
USGS	10107	D-1510	482	Primates	Notharctidae	Cantius	abditus	1	4.71	3.82	0	0	lm1-m2
USGS	30254	D-1510	482	Primates	Notharctidae	Cantius	abditus	4	0	0	0	0	2 M, rm2, lm3
USGS	30272	D-1510	482	Primates	Notharctidae	Cantius	abditus	1	4.46	3.61	0	0	lp3-m1
USGS	30278	D-1510	482	Primates	Notharctidae	Cantius	abditus	1	0	0	0	0	jaw frag
USGS	9539-dup	D-1510	482	Primates	Notharctidae	Cantius	abditus	10	0	0	0	0	misc m
USGS	30262	D-1994	482	Primates	Notharctidae	Cantius	abditus	1	0	0	4.92	4.04	rm1-2 (broken)
USGS	30271	D-1994	482	Primates	Notharctidae	Cantius	abditus	1	0	0	0	0	lm2-3, frags
USGS	30277	D-1994	482	Primates	Notharctidae	Cantius	abditus	1	5.4	4.2	0	0	lp4-m1
USGS	30279	D-1994	482	Primates	Notharctidae	Cantius	abditus	1	0	0	0	0	lP4-M2
NMNH	521404	D-1994	482	Primates	Notharctidae	Cantius	abditus	1	0	0	0	0	lM1-3
NMNH	522216	D-1994	482	Primates	Notharctidae	Cantius	abditus	2	0	0	0	0	rp2, lp4-m2
USGS	4571	D-1307	483	Primates	Notharctidae	Cantius	abditus	1	5.18	4.15	0	0	lp3-m3
USGS	4641	D-1307	483	Primates	Notharctidae	Cantius	abditus	1	0	0	4.85	4.04	rm1-3
USGS	4642	D-1307	483	Primates	Notharctidae	Cantius	abditus	1	0	0	4.71	4	rm1-3
USGS	4643	D-1307	483	Primates	Notharctidae	Cantius	abditus	1	0	0	0	0	rm2
USGS	4644	D-1307	483	Primates	Notharctidae	Cantius	abditus	1	0	0	0	0	rm3
USGS	4645	D-1307	483	Primates	Notharctidae	Cantius	abditus	2	0	0	0	0	misc m
USGS	4646	D-1307	483	Primates	Notharctidae	Cantius	abditus	1	0	0	0	0	rp3-4
USGS	4647	D-1307	483	Primates	Notharctidae	Cantius	abditus	1	4.99	3.92	0	0	lm1
USGS	4458	D-1312	483	Primates	Notharctidae	Cantius	abditus	1	0	0	0	0	rm2-3
USGS	4459	D-1312	483	Primates	Notharctidae	Cantius	abditus	1	0	0	0	0	lm2
USGS	4460	D-1312	483	Primates	Notharctidae	Cantius	abditus	1	0	0	0	0	jaw frag
USGS	4462	D-1312	483	Primates	Notharctidae	Cantius	abditus	1	0	0	4.92	3.96	rp4-m2
USGS	4463	D-1312	483	Primates	Notharctidae	Cantius	abditus	1	0	0	0	0	lm2 frag
USGS	4464	D-1312	483	Primates	Notharctidae	Cantius	abditus	1	0	0	0	0	rM1
USGS	4543	D-1312	483	Primates	Notharctidae	Cantius	abditus	1	4.68	4.26	5.08	3.94	rp4-m2, lp4-m3, rP4-M3 (m1s broken)
USGS	13571	D-1317	483	Primates	Notharctidae	Cantius	abditus	1	0	0	0	0	lm3
USGS	13572	D-1317	483	Primates	Notharctidae	Cantius	abditus	1	0	0	0	0	lP4-M3
USGS	4669	D-1331	483	Primates	Notharctidae	Cantius	abditus	1	0	0	0	0	rm2-3
USGS	4670	D-1331	483	Primates	Notharctidae	Cantius	abditus	1	4.71	3.91	0	0	lp4-m3
USGS	8403	D-1397	483	Primates	Notharctidae	Cantius	abditus	1	0	0	4.67	3.57	rm1-2
USGS	8404	D-1397	483	Primates	Notharctidae	Cantius	abditus	1	0	0	0	0	lm2-3
USGS	8405	D-1397	483	Primates	Notharctidae	Cantius	abditus	1	4.81	3.85	0	0	lm1-2
USGS	8406	D-1397	483	Primates	Notharctidae	Cantius	abditus	4	0	0	0	0	misc teeth
USGS	15735	D-1397	483	Primates	Notharctidae	Cantius	abditus	1	0	0	0	0	lP4-M2
NMNH	540368	D-1397	483	Primates	Notharctidae	Cantius	abditus	1					R dentary with m3
NMNH	540465	D-1397	483	Primates	Notharctidae	Cantius	abditus	1					L dentary with m1-3, R dentary with m1-3 and assoc ?R p2, R p4 (Broken)
USGS	13548	D-1586	483	Primates	Notharctidae	Cantius	abditus	1	0	0	0	0	lm, broken
USGS	13549	D-1586	483	Primates	Notharctidae	Cantius	abditus	1	0	0	0	0	lP4-M1
USGS	13550	D-1586	483	Primates	Notharctidae	Cantius	abditus	1	5.12	4.24	0	0	r and lP4-M3, lp4-m1
USGS	30248	D-1993	484	Primates	Notharctidae	Cantius	abditus	1	0	0	4.52	3.56	rp4-m2
USGS	9944	D-1531	485	Primates	Notharctidae	Cantius	abditus	1	0	0	5.07	4.15	rp4-m3
USGS	9945	D-1531	485	Primates	Notharctidae	Cantius	abditus	1	0	0	5.21	4.28	rm1-3
USGS	9946	D-1531	485	Primates	Notharctidae	Cantius	abditus	1	0	0	0	0	lm2-3
USGS	9947	D-1531	485	Primates	Notharctidae	Cantius	abditus	1	5.1	4.1	0	0	lp4-m1
USGS	15452	D-1531	485	Primates	Notharctidae	Cantius	abditus	1	0	0	0	0	rm2
USGS	15453	D-1531	485	Primates	Notharctidae	Cantius	abditus	1	0	0	5.37	4.45	rm1-2
USGS	15454	D-1531	485	Primates	Notharctidae	Cantius	abditus	1	4.93	4.04	0	0	lp4-m2
USGS	27745	D-1531	485	Primates	Notharctidae	Cantius	abditus	1	0	0	0	0	rp4
USGS	27746	D-1531	485	Primates	Notharctidae	Cantius	abditus	1	0	0	0	0	rm3
USGS	27748	D-1531	485	Primates	Notharctidae	Cantius	abditus	1	0	0	0	0	lm3
USGS	10082	D-1532	485	Primates	Notharctidae	Cantius	abditus	1	0	0	0	0	rm2
USGS	10083	D-1532	485	Primates	Notharctidae	Cantius	abditus	1	0	0	4.91	4.1	rp3-m2
USGS	18340	D-1532	485	Primates	Notharctidae	Cantius	abditus	1	0	0	0	0	rp4
USGS	18341	D-1532	485	Primates	Notharctidae	Cantius	abditus	2	0	0	0	0	rM1, misc jaw frag
USGS	18343	D-1532	485	Primates	Notharctidae	Cantius	abditus	1	0	0	0	0	lP4-M3
USGS	18344	D-1532	485	Primates	Notharctidae	Cantius	abditus	1	0	0	0	0	rP4-M3
USGS	18345	D-1532	485	Primates	Notharctidae	Cantius	abditus	1	0	0	0	0	lm3
USGS	18347	D-1532	485	Primates	Notharctidae	Cantius	abditus	1	4.93	4	0	0	lm1-2
USGS	20007	D-1532	485	Primates	Notharctidae	Cantius	abditus	1	0	0	0	0	rp3
USGS	23787	D-1532	485	Primates	Notharctidae	Cantius	abditus	1	0	0	5.26	4.37	rm1-3
USGS	28079	D-1532	485	Primates	Notharctidae	Cantius	abditus	1	0	0	0	0	lm2-3
USGS	30006	D-1532	485	Primates	Notharctidae	Cantius	abditus	2	0	0	0	0	rm2, lm3
USGS	30009	D-1532	485	Primates	Notharctidae	Cantius	abditus	1	0	0	0	0	rm2-3
USGS	30010	D-1532	485	Primates	Notharctidae	Cantius	abditus	3	0	0	0	0	misc M
USGS	30092	D-1532	485	Primates	Notharctidae	Cantius	abditus	1	0	0	0	0	rP4
USGS	38019	D-1532	485	Primates	Notharctidae	Cantius	abditus	1	5.18	4.05	0	0	lm1-2
USGS	38020	D-1532	485	Primates	Notharctidae	Cantius	abditus	1	0	0	0	0	rm2
USGS	38021	D-1532	485	Primates	Notharctidae	Cantius	abditus	1	0	0	0	0	rm2
USGS	10059	D-1552	485	Primates	Notharctidae	Cantius	abditus	1	5.16	4.17	0	0	lp4-m2
USGS	7117	D-1257	486	Primates	Notharctidae	Cantius	abditus	1	0	0	0	0	lm3
USGS	7264	D-1257	486	Primates	Notharctidae	Cantius	abditus	1	0	0	0	0	lM1
USGS	8518	D-1257	486	Primates	Notharctidae	Cantius	abditus	2	0	0	0	0	misc jaw frags
USGS	13733	D-1257	486	Primates	Notharctidae	Cantius	abditus	1	0	0	0	0	lM2
USGS	13734	D-1257	486	Primates	Notharctidae	Cantius	abditus	1	0	0	0	0	lm2-3
USGS	4470	D-1305	486	Primates	Notharctidae	Cantius	abditus	1	0	0	5.1	4.12	rp4-m3
USGS	6980	D-1491	486	Primates	Notharctidae	Cantius	abditus	1	0	0	0	0	lP4-M3
USGS	27615	D-1734	489	Primates	Notharctidae	Cantius	abditus	2	0	0	0	0	rp4, rm2
USGS	25809	D-1825	489	Primates	Notharctidae	Cantius	abditus	1	0	0	0	0	rm2-3
USGS	8810	Y-47	489	Primates	Notharctidae	Cantius	abditus	1	5.03	3.95	0	0	lp3-m1
USGS	421	D-1230	490	Primates	Notharctidae	Cantius	abditus	1	0	0	0	0	rm2-3
USGS	1463	D-1230	490	Primates	Notharctidae	Cantius	abditus	5	5.11	4.34	0	0	lm1, misc teeth
USGS	1464	D-1230	490	Primates	Notharctidae	Cantius	abditus	1	4.68	3.87	0	0	lp4-m2
USGS	6029	D-1230	490	Primates	Notharctidae	Cantius	abditus	1	0	0	0	0	rm2-3
USGS	6030	D-1230	490	Primates	Notharctidae	Cantius	abditus	1	0	0	0	0	rp3
USGS	6031	D-1230	490	Primates	Notharctidae	Cantius	abditus	1	0	0	0	0	rm2
USGS	6032	D-1230	490	Primates	Notharctidae	Cantius	abditus	1	0	0	0	0	rp2-4
USGS	6033	D-1230	490	Primates	Notharctidae	Cantius	abditus	1	0	0	0	0	rm2-3
USGS	6035	D-1230	490	Primates	Notharctidae	Cantius	abditus	1	0	0	5.16	4.23	rp3-m2
USGS	6038	D-1230	490	Primates	Notharctidae	Cantius	abditus	1	0	0	0	0	lm2-3
USGS	6039	D-1230	490	Primates	Notharctidae	Cantius	abditus	1	0	0	0	0	rm2-3
USGS	6040	D-1230	490	Primates	Notharctidae	Cantius	abditus	1	0	0	0	0	lm3
USGS	6041	D-1230	490	Primates	Notharctidae	Cantius	abditus	1	0	0	0	0	lm2-3
USGS	6042	D-1230	490	Primates	Notharctidae	Cantius	abditus	1	0	0	0	0	rm2-3
USGS	6043	D-1230	490	Primates	Notharctidae	Cantius	abditus	1	0	0	0	0	lm3
USGS	6044	D-1230	490	Primates	Notharctidae	Cantius	abditus	1	0	0	4.85	4.04	rp4-m2
USGS	6045	D-1230	490	Primates	Notharctidae	Cantius	abditus	1	0	0	4.99	3.9	rp4-m1
USGS	6047	D-1230	490	Primates	Notharctidae	Cantius	abditus	1	0	0	0	0	rm2
USGS	6051	D-1230	490	Primates	Notharctidae	Cantius	abditus	1	0	0	0	0	lM1-2
USGS	6053	D-1230	490	Primates	Notharctidae	Cantius	abditus	1	0	0	0	0	lm2
USGS	6054	D-1230	490	Primates	Notharctidae	Cantius	abditus	1	0	0	0	0	rm1-2 (broken)
USGS	6055	D-1230	490	Primates	Notharctidae	Cantius	abditus	1	0	0	0	0	lm2
USGS	6056	D-1230	490	Primates	Notharctidae	Cantius	abditus	1	0	0	0	0	rM2
USGS	6058	D-1230	490	Primates	Notharctidae	Cantius	abditus	1	0	0	0	0	lP3-4
USGS	7896	D-1230	490	Primates	Notharctidae	Cantius	abditus	1	0	0	5.15	4.24	rp4-m2
USGS	7907	D-1230	490	Primates	Notharctidae	Cantius	abditus	1	0	0	0	0	jaw frag
USGS	7909	D-1230	490	Primates	Notharctidae	Cantius	abditus	4	0	0	0	0	misc teeth frags
USGS	8176	D-1230	490	Primates	Notharctidae	Cantius	abditus	1	0	0	0	0	rp2-4
USGS	8178	D-1230	490	Primates	Notharctidae	Cantius	abditus	1	5.13	3.78	0	0	lm1-3
USGS	8179	D-1230	490	Primates	Notharctidae	Cantius	abditus	1	0	0	4.61	3.77	rm1-2
USGS	8180	D-1230	490	Primates	Notharctidae	Cantius	abditus	1	0	0	5.05	4.07	rm1-2
USGS	8181	D-1230	490	Primates	Notharctidae	Cantius	abditus	1	0	0	0	0	rM1-3
USGS	8182	D-1230	490	Primates	Notharctidae	Cantius	abditus	1	5.11	3.98	0	0	lm1
USGS	8194	D-1230	490	Primates	Notharctidae	Cantius	abditus	6	0	0	0	0	misc m
USGS	16571	D-1230	490	Primates	Notharctidae	Cantius	abditus	1	5.15	4.19	0	0	lp3-m1
NMNH	uncatalogued	D-1230	490	Primates	Notharctidae	Cantius	abditus	12	5.17	4.23	5.05	4.13	lp3-m2, rp4-m2, misc jaws and teeth
USGS	10076	D-1426	490	Primates	Notharctidae	Cantius	abditus	1	5.03	4.17	0	0	lm1-2
USGS	10077	D-1426	490	Primates	Notharctidae	Cantius	abditus	1	0	0	0	0	rM2
USGS	1825	D-1163	491	Primates	Notharctidae	Cantius	abditus	1	5.04	3.73	0	0	lp2-m3
USGS	1833	D-1163	491	Primates	Notharctidae	Cantius	abditus	1	4.84	3.83	0	0	lm1-2
USGS	1834	D-1163	491	Primates	Notharctidae	Cantius	abditus	1	0	0	0	0	rM1-2
USGS	1835	D-1163	491	Primates	Notharctidae	Cantius	abditus	1	0	0	0	0	lm2-3
USGS	3671	D-1338	491	Primates	Notharctidae	Cantius	abditus	2	0	0	4.9	4.16	rp3-m2, lm3
USGS	4659	D-1338	491	Primates	Notharctidae	Cantius	abditus	1	0	0	0	0	lp4
USGS	4660	D-1338	491	Primates	Notharctidae	Cantius	abditus	1	0	0	0	0	lm2
USGS	8206	D-1338	491	Primates	Notharctidae	Cantius	abditus	1	4.72	4	0	0	lp3-m3
USGS	8211	D-1338	491	Primates	Notharctidae	Cantius	abditus	1	0	0	0	0	lM2
USGS	13737	D-1344	491	Primates	Notharctidae	Cantius	abditus	1	0	0	0	0	rP3-M1
USGS	4626	D-1345	491	Primates	Notharctidae	Cantius	abditus	3	0	0	5.11	4.07	rm1, lm3, M
USGS	38007	D-1345	491	Primates	Notharctidae	Cantius	abditus	1	5.27	4.33	0	0	lm1
USGS	4480	D-1346	491	Primates	Notharctidae	Cantius	abditus	1	0	0	0	0	rM2-3
USGS	4720	D-1346	491	Primates	Notharctidae	Cantius	abditus	1	0	0	0	0	lM1-3
USGS	4721	D-1346	491	Primates	Notharctidae	Cantius	abditus	1	0	0	0	0	lm2-3
USGS	4722	D-1346	491	Primates	Notharctidae	Cantius	abditus	1	0	0	0	0	lm2
USGS	8670	D-1469	491	Primates	Notharctidae	Cantius	abditus	1	5.06	4.14	4.99	4.17	lp3-m3, rm1-2
USGS	8671	D-1469	491	Primates	Notharctidae	Cantius	abditus	1	5.13	4.24	0	0	lm1-3
USGS	8672	D-1469	491	Primates	Notharctidae	Cantius	abditus	1	5.42	4.31	0	0	lp4-m2
USGS	8675	D-1469	491	Primates	Notharctidae	Cantius	abditus	2	0	0	0	0	lp3, pm1
USGS	8676	D-1469	491	Primates	Notharctidae	Cantius	abditus	1	0	0	0	0	rm2-3
NMNH	522218	D-1469	491	Primates	Notharctidae	Cantius	abditus	1	0	0	0	0	rp3, rm1
USGS	8592	D-1470	491	Primates	Notharctidae	Cantius	abditus	3	0	0	0	0	lm2, lm3, M
USGS	8739	D-1471	491	Primates	Notharctidae	Cantius	abditus	3	4.67	4.04	0	0	lm1, rm2, lp4
USGS	27677	D-1966	491	Primates	Notharctidae	Cantius	abditus	1	0	0	0	0	lm2
USGS	1691	Y-27	491	Primates	Notharctidae	Cantius	abditus	2	0	0	0	0	m frags
USGS	8040	D-1436	492	Primates	Notharctidae	Cantius	abditus	1	0	0	0	0	lm2-3
USGS	8041	D-1436	492	Primates	Notharctidae	Cantius	abditus	4	0	0	0	0	2 rm2, rm3, M
USGS	8790	D-1436	492	Primates	Notharctidae	Cantius	abditus	1	0	0	0	0	lm2
USGS	9086	D-1436	492	Primates	Notharctidae	Cantius	abditus	1	5.14	3.94	4.85	3.91	r and lm1-3
NMNH	522219	D-1436	492	Primates	Notharctidae	Cantius	abditus	2	0	0	0	0	rm3, upper jaw frag
NMNH	522222	D-1436	492	Primates	Notharctidae	Cantius	abditus	1	0	0	0	0	lm3, frags
USGS	30231	D-1992	492	Primates	Notharctidae	Cantius	abditus	1	0	0	0	0	rm2-3
USGS	10080	D-1563	493	Primates	Notharctidae	Cantius	abditus	1	0	0	0	0	p frags
USGS	15447	D-1563	493	Primates	Notharctidae	Cantius	abditus	2	0	0	0	0	rM1, lP4
USGS	16604	D-1563	493	Primates	Notharctidae	Cantius	abditus	2	0	0	5.25	4.4	rm1, rm2
USGS	16605	D-1563	493	Primates	Notharctidae	Cantius	abditus	1	0	0	0	0	lm2-3
USGS	16606	D-1563	493	Primates	Notharctidae	Cantius	abditus	1	0	0	0	0	rm2-3
USGS	23753	D-1563	493	Primates	Notharctidae	Cantius	abditus	1	0	0	0	0	m frag
USGS	23755	D-1563	493	Primates	Notharctidae	Cantius	abditus	1	0	0	0	0	lm2 frag
NMNH	521377	D-1563	493	Primates	Notharctidae	Cantius	abditus	1	0	0	0	0	lp3-m2
USGS	8743	D-1408	494	Primates	Notharctidae	Cantius	abditus	1	0	0	0	0	jaw frag
USGS	8745	D-1408	494	Primates	Notharctidae	Cantius	abditus	1	0	0	0	0	rm3
USGS	27715	D-1408	494	Primates	Notharctidae	Cantius	abditus	2	0	0	0	0	rM2-3
USGS	30076	D-1408	494	Primates	Notharctidae	Cantius	abditus	1	5.08	4.3	0	0	lm1-3
USGS	30090	D-1408	494	Primates	Notharctidae	Cantius	abditus	1	0	0	0	0	lm2-3
USGS	9390	D-1507	494	Primates	Notharctidae	Cantius	abditus	1	0	0	4.91	4	rm1-3, lm2
USGS	9393	D-1507	494	Primates	Notharctidae	Cantius	abditus	1	0	0	0	0	rp3-4
USGS	9394	D-1507	494	Primates	Notharctidae	Cantius	abditus	1	0	0	0	0	lm2-3
USGS	9396	D-1507	494	Primates	Notharctidae	Cantius	abditus	1	5.21	4.14	0	0	lp4-m2
USGS	9397	D-1507	494	Primates	Notharctidae	Cantius	abditus	1	0	0	0	0	lm2
USGS	9398	D-1507	494	Primates	Notharctidae	Cantius	abditus	1	0	0	0	0	rp3-4
USGS	9399	D-1507	494	Primates	Notharctidae	Cantius	abditus	1	0	0	5.01	4.23	rp4-m1
USGS	9401	D-1507	494	Primates	Notharctidae	Cantius	abditus	1	0	0	0	0	rm2
USGS	9402	D-1507	494	Primates	Notharctidae	Cantius	abditus	1	0	0	0	0	lp3-4
USGS	9405	D-1507	494	Primates	Notharctidae	Cantius	abditus	1	0	0	0	0	rM1-3
USGS	9406	D-1507	494	Primates	Notharctidae	Cantius	abditus	23	5.1	4.06	5.28	3.87	misc teeth, incl 2 rm1, lm1
USGS	9412	D-1507	494	Primates	Notharctidae	Cantius	abditus	1	0	0	0	0	rM1-3
USGS	7043	D-1508	494	Primates	Notharctidae	Cantius	abditus	2	0	0	0	0	rP4, rM1
USGS	7044	D-1508	494	Primates	Notharctidae	Cantius	abditus	1	5.2	4.17	0	0	lp4-m1
USGS	7045	D-1508	494	Primates	Notharctidae	Cantius	abditus	1	0	0	0	0	rm2-3
USGS	7047	D-1508	494	Primates	Notharctidae	Cantius	abditus	1	0	0	0	0	lm2-3
USGS	7048	D-1508	494	Primates	Notharctidae	Cantius	abditus	1	4.79	3.77	0	0	lp2-m1
USGS	7049	D-1508	494	Primates	Notharctidae	Cantius	abditus	1	0	0	0	0	rm2-3
USGS	7050	D-1508	494	Primates	Notharctidae	Cantius	abditus	5	5.17	3.88	0	0	misc teeth, incl lm1
USGS	7304	D-1508	494	Primates	Notharctidae	Cantius	abditus	1	0	0	4.97	4.13	rm1-2
USGS	7305	D-1508	494	Primates	Notharctidae	Cantius	abditus	1	4.93	4.16	0	0	lm1-2
USGS	27648	D-1910	494	Primates	Notharctidae	Cantius	abditus	1	5.01	4.22	0	0	lp3-m2
USGS	16592	D-1672	495	Primates	Notharctidae	Cantius	abditus	1	0	0	0	0	rP4-M3
USGS	16593	D-1672	495	Primates	Notharctidae	Cantius	abditus	2	0	0	5.12	3.88	rm1, rM3
USGS	7675	D-1474	496	Primates	Notharctidae	Cantius	abditus	2	5.1	3.95	5.06	3.95	r and lp4-m2
USGS	7676	D-1474	496	Primates	Notharctidae	Cantius	abditus	2	0	0	0	0	lM1-3, rP4-M2
USGS	7677	D-1474	496	Primates	Notharctidae	Cantius	abditus	1	0	0	5.04	4.15	rm1-3
USGS	7679	D-1474	496	Primates	Notharctidae	Cantius	abditus	1	0	0	5.06	3.92	rm1-3
USGS	7681	D-1474	496	Primates	Notharctidae	Cantius	abditus	1	0	0	0	0	jaw frag
USGS	7682	D-1474	496	Primates	Notharctidae	Cantius	abditus	1	0	0	0	0	lM1-2
USGS	38512	D-1474	496	Primates	Notharctidae	Cantius	abditus	1	5.14	4.14	0	0	lm1
USGS	25895	D-1782	496	Primates	Notharctidae	Cantius	abditus	1	5.14	4.13	0	0	lp4-m3 (m1 broken)
NMNH	509648	D-1782	496	Primates	Notharctidae	Cantius	abditus	1	0	0	0	0	lm3
NMNH	509656	D-1782	496	Primates	Notharctidae	Cantius	abditus	1	0	0	0	0	lM1-3
NMNH	509657	D-1782	496	Primates	Notharctidae	Cantius	abditus	1	0	0	0	0	lM2-3
NMNH	511022	D-1782	496	Primates	Notharctidae	Cantius	abditus	1	0	0	0	0	lp4-m2, rm3, lM1
USGS	30240	D-2009	496	Primates	Notharctidae	Cantius	abditus	1	0	0	0	0	rM1-3
USGS	30256	D-2009	496	Primates	Notharctidae	Cantius	abditus	1	0	0	0	0	lP4-M3
USGS	4473	D-1337	499	Primates	Notharctidae	Cantius	abditus	1	0	0	0	0	lP4-M2
USGS	23785	D-1337	499	Primates	Notharctidae	Cantius	abditus	1	0	0	0	0	rm1-2 (m1 broken)
USGS	23790	D-1337	499	Primates	Notharctidae	Cantius	abditus	1	0	0	0	0	rp4
NMNH	uncatalogued	D-1174	501	Primates	Notharctidae	Cantius	abditus	1	5.01	4.04			lm1-2
USGS	9079	D-1175	501	Primates	Notharctidae	Cantius	abditus	1	0	0	0	0	rm2
NMNH	522226	D-1175	501	Primates	Notharctidae	Cantius	abditus	1	0	0	0	0	rm2-3
USGS	8445	D-1431	501	Primates	Notharctidae	Cantius	abditus	1	0	0	0	0	m3 frag
USGS	18383	D-1431	501	Primates	Notharctidae	Cantius	abditus	2	0	0	0	0	m frags
USGS	8808	D-1433	501	Primates	Notharctidae	Cantius	abditus	1	0	0	0	0	jaw frag
USGS	27710	D-1433	501	Primates	Notharctidae	Cantius	abditus	1	0	0	0	0	lm2-3
NMNH	540428	D-1433	501	Primates	Notharctidae	Cantius	abditus	1					R max with P4-M3
USGS	8308	D-1468	501	Primates	Notharctidae	Cantius	abditus	2	0	0	0	0	rM1-3, rM2
USGS	25792	D-1829	501	Primates	Notharctidae	Cantius	abditus	4	0	0	0	0	misc M
USGS	25797	D-1829	501	Primates	Notharctidae	Cantius	abditus	1	0	0	0	0	lM1-2
USGS	25798	D-1829	501	Primates	Notharctidae	Cantius	abditus	1	0	0	0	0	rM2
USGS	8007	Y-168	501	Primates	Notharctidae	Cantius	abditus	1	0	0	0	0	rm2
USGS	8821	Y-25	501	Primates	Notharctidae	Cantius	abditus	1	0	0	0	0	lm2
USGS	8631	Y-39	501	Primates	Notharctidae	Cantius	abditus	1	0	0	0	0	rp4
USGS	9070	Y-39	501	Primates	Notharctidae	Cantius	abditus	3	5.16	4.12	5.12	4.25	rp4-m2, lm1-3, frag
USGS	16584	Y-39	501	Primates	Notharctidae	Cantius	abditus	1	0	0	0	0	lm2-3
USGS	8597	Y-76	501	Primates	Notharctidae	Cantius	abditus	1	0	0	0	0	lm1-2, heavily worn
NMNH	540321	Y-77N	501	Primates	Notharctidae	Cantius	abditus	1					R m3
NMNH	540322	Y-77N	501	Primates	Notharctidae	Cantius	abditus	1					max with R M1-3
USGS	38075	D-1984	504	Primates	Notharctidae	Cantius	abditus	1	0	0	0	0	rP3-M3
USGS	13521	D-1609	505	Primates	Notharctidae	Cantius	abditus	2	0	0	0	0	2 x m3
USGS	13535	D-1609	505	Primates	Notharctidae	Cantius	abditus	3	0	0	0	0	rm2 frag, c, jaw frag
USGS	372	D-1204	~441	Primates	Notharctidae	Cantius	abditus	1	0	0	0	0	rm2
USGS	377	D-1204	~441	Primates	Notharctidae	Cantius	abditus	1	0	0	0	0	lm1-2
USGS	379	D-1204	~441	Primates	Notharctidae	Cantius	abditus	1	0	0	0	0	rp3
USGS	380	D-1204	~441	Primates	Notharctidae	Cantius	abditus	1	0	0	0	0	lm2-3
USGS	381	D-1204	~441	Primates	Notharctidae	Cantius	abditus	1	0	0	0	0	lm2
USGS	383	D-1204	~441	Primates	Notharctidae	Cantius	abditus	1	4.64	3.54	5.02	4.01	l and rm1
USGS	397	D-1204	~441	Primates	Notharctidae	Cantius	abditus	1	0	0	5.02	3.83	rp4-m1
USGS	424	D-1204	~441	Primates	Notharctidae	Cantius	abditus	1	0	0	0	0	lm2-3
USGS	425	D-1204	~441	Primates	Notharctidae	Cantius	abditus	1	0	0	5.1	3.99	rp4-m3
USGS	426	D-1204	~441	Primates	Notharctidae	Cantius	abditus	1	0	0	4.74	3.95	rp4-m2
USGS	428	D-1204	~441	Primates	Notharctidae	Cantius	abditus	1	0	0	0	0	rm2
USGS	432	D-1204	~441	Primates	Notharctidae	Cantius	abditus	1	0	0	0	0	rm3
USGS	433	D-1204	~441	Primates	Notharctidae	Cantius	abditus	1	0	0	0	0	lP4-M2
USGS	434	D-1204	~441	Primates	Notharctidae	Cantius	abditus	1	0	0	0	0	lP3-M2
USGS	435	D-1204	~441	Primates	Notharctidae	Cantius	abditus	1	4.65	3.6	0	0	lp4-m1
USGS	437	D-1204	~441	Primates	Notharctidae	Cantius	abditus	1	4.96	4.16	0	0	lp4-m2
USGS	438	D-1204	~441	Primates	Notharctidae	Cantius	abditus	1	0	0	4.91	3.91	rp4-m2
USGS	439	D-1204	~441	Primates	Notharctidae	Cantius	abditus	1	0	0	0	0	rm2
USGS	445	D-1204	~441	Primates	Notharctidae	Cantius	abditus	1	0	0	0	0	lP4-M3
USGS	820	D-1204	~441	Primates	Notharctidae	Cantius	abditus	1	0	0	0	0	lP3-M3
USGS	1377	D-1204	~441	Primates	Notharctidae	Cantius	abditus	1	0	0	4.43	3.7	rp4-m1
USGS	1378	D-1204	~441	Primates	Notharctidae	Cantius	abditus	1	0	0	0	0	rm1-2
USGS	1379	D-1204	~441	Primates	Notharctidae	Cantius	abditus	1	0	0	4.76	3.86	rm1-2
USGS	1382	D-1204	~441	Primates	Notharctidae	Cantius	abditus	10	5.02	3.89	0	0	lm1, misc teeth
USGS	4484	D-1204	~441	Primates	Notharctidae	Cantius	abditus	1	0	0	0	0	rm2
USGS	6144	D-1204	~441	Primates	Notharctidae	Cantius	abditus	1	0	0	4.83	3.86	rp3-m1
USGS	6145	D-1204	~441	Primates	Notharctidae	Cantius	abditus	1	0	0	4.65	3.98	rm1-2
USGS	6146	D-1204	~441	Primates	Notharctidae	Cantius	abditus	1	0	0	0	0	rm2-3
USGS	6147	D-1204	~441	Primates	Notharctidae	Cantius	abditus	1	4.93	4.06	0	0	lp3-m3
USGS	6148	D-1204	~441	Primates	Notharctidae	Cantius	abditus	1	0	0	4.83	4.05	rp4-m2
USGS	6149	D-1204	~441	Primates	Notharctidae	Cantius	abditus	1	5.02	3.99	0	0	lp3-m1
USGS	6150	D-1204	~441	Primates	Notharctidae	Cantius	abditus	1	4.99	3.97	0	0	lp4-m1
USGS	6151	D-1204	~441	Primates	Notharctidae	Cantius	abditus	1	0	0	4.73	3.93	rm1-2
USGS	6153	D-1204	~441	Primates	Notharctidae	Cantius	abditus	1	0	0	0	0	lP3-M3
USGS	6154	D-1204	~441	Primates	Notharctidae	Cantius	abditus	1	4.77	3.96	0	0	lp4-m1
USGS	6155	D-1204	~441	Primates	Notharctidae	Cantius	abditus	1	0	0	0	0	rm2-3
USGS	6156	D-1204	~441	Primates	Notharctidae	Cantius	abditus	1	0	0	0	0	rm2-3
USGS	6157	D-1204	~441	Primates	Notharctidae	Cantius	abditus	1	0	0	0	0	rM2
USGS	6158	D-1204	~441	Primates	Notharctidae	Cantius	abditus	7	0	0	4.61	3.64	misc teeth
USGS	8219	D-1204	~441	Primates	Notharctidae	Cantius	abditus	1	0	0	0	0	rm2-3
USGS	8221	D-1204	~441	Primates	Notharctidae	Cantius	abditus	2	0	0	0	0	misc m, jaw frag
USGS	8288	D-1204	~441	Primates	Notharctidae	Cantius	abditus	1	0	0	0	0	lm2
USGS	13462	D-1204	~441	Primates	Notharctidae	Cantius	abditus	1	0	0	4.99	4.09	rm1-3
USGS	13463	D-1204	~441	Primates	Notharctidae	Cantius	abditus	1	0	0	0	0	lm2-3
USGS	13464	D-1204	~441	Primates	Notharctidae	Cantius	abditus	1	0	0	0	0	rP4-M2
USGS	13468	D-1204	~441	Primates	Notharctidae	Cantius	abditus	1	0	0	4.87	3.71	rp3-m1
USGS	13469	D-1204	~441	Primates	Notharctidae	Cantius	abditus	1	0	0	0	0	rM1-2
USGS	13470	D-1204	~441	Primates	Notharctidae	Cantius	abditus	1	0	0	0	0	rm2-3
USGS	13472	D-1204	~441	Primates	Notharctidae	Cantius	abditus	1	0	0	0	0	rm2-3
USGS	13473	D-1204	~441	Primates	Notharctidae	Cantius	abditus	1	0	0	0	0	lm3
USGS	13474	D-1204	~441	Primates	Notharctidae	Cantius	abditus	21	0	0	0	0	misc teeth
USGS	13475	D-1204	~441	Primates	Notharctidae	Cantius	abditus	1	0	0	0	0	rM1-2
USGS	13476	D-1204	~441	Primates	Notharctidae	Cantius	abditus	1	0	0	0	0	lm2-3
USGS	13477	D-1204	~441	Primates	Notharctidae	Cantius	abditus	1	0	0	0	0	rm2
USGS	13478	D-1204	~441	Primates	Notharctidae	Cantius	abditus	1	0	0	0	0	lp3-4
USGS	13482	D-1204	~441	Primates	Notharctidae	Cantius	abditus	1	0	0	0	0	lm2
USGS	13483	D-1204	~441	Primates	Notharctidae	Cantius	abditus	1	0	0	0	0	rm2
USGS	13484	D-1204	~441	Primates	Notharctidae	Cantius	abditus	1	0	0	0	0	lM1-3
USGS	13485	D-1204	~441	Primates	Notharctidae	Cantius	abditus	1	0	0	0	0	rm2-3
USGS	13486	D-1204	~441	Primates	Notharctidae	Cantius	abditus	1	0	0	5.02	3.93	rm1-3
USGS	15960	D-1204	~441	Primates	Notharctidae	Cantius	abditus	1	0	0	0	0	lm2-3, covered
USGS	16525	D-1204	~441	Primates	Notharctidae	Cantius	abditus	1	0	0	0	0	lm2-3
USGS	16526	D-1204	~441	Primates	Notharctidae	Cantius	abditus	1	4.91	3.93	0	0	lm1-3
USGS	16528	D-1204	~441	Primates	Notharctidae	Cantius	abditus	3	4.81	3.8	0	0	lm1, rp4, M frag
USGS	27685	D-1204	~441	Primates	Notharctidae	Cantius	abditus	1	0	0	0	0	lm2-3
USGS	27688	D-1204	~441	Primates	Notharctidae	Cantius	abditus	1	4.68	3.61	0	0	lp4-m2
USGS	27689	D-1204	~441	Primates	Notharctidae	Cantius	abditus	1	4.83	3.91	0	0	lm1
USGS	27691	D-1204	~441	Primates	Notharctidae	Cantius	abditus	1	0	0	4.83	3.74	rp4-m1
USGS	27692	D-1204	~441	Primates	Notharctidae	Cantius	abditus	1	4.83	3.51	0	0	lp4-m1
USGS	27693	D-1204	~441	Primates	Notharctidae	Cantius	abditus	1	0	0	4.67	3.88	rm1-2
USGS	27698	D-1204	~441	Primates	Notharctidae	Cantius	abditus	1	0	0	0	0	rm3
USGS	27699	D-1204	~441	Primates	Notharctidae	Cantius	abditus	1	4.85	3.88	0	0	lm1
USGS	27702	D-1204	~441	Primates	Notharctidae	Cantius	abditus	1	4.89	3.81	0	0	lm1-3
USGS	27703	D-1204	~441	Primates	Notharctidae	Cantius	abditus	1	0	0	5.07	3.77	rp3-m1
USGS	27704	D-1204	~441	Primates	Notharctidae	Cantius	abditus	1	0	0	0	0	rm2-3
USGS	27705	D-1204	~441	Primates	Notharctidae	Cantius	abditus	1	4.96	3.94	0	0	lm1-2
USGS	27706	D-1204	~441	Primates	Notharctidae	Cantius	abditus	1	4.99	4.18	0	0	lm1-3
USGS	27707	D-1204	~441	Primates	Notharctidae	Cantius	abditus	1	0	0	4.93	4.23	rp4-m1
USGS	27713	D-1204	~441	Primates	Notharctidae	Cantius	abditus	1	0	0	0	0	lm3
USGS	27744	D-1204	~441	Primates	Notharctidae	Cantius	abditus	1	4.71	4.04	0	0	lp3-m1
USGS	27747	D-1204	~441	Primates	Notharctidae	Cantius	abditus	1	0	0	4.81	3.94	rp3-m2
USGS	30165	D-1204	~441	Primates	Notharctidae	Cantius	abditus	1	4.89	3.97	0	0	lm1-2
USGS	30178	D-1204	~441	Primates	Notharctidae	Cantius	abditus	1	0	0	4.73	3.95	rm1-2
USGS	30180	D-1204	~441	Primates	Notharctidae	Cantius	abditus	1	0	0	0	0	rm3
NMNH	495525	D-1204	~441	Primates	Notharctidae	Cantius	abditus	1	0	0	0	0	rM1-2
NMNH	495527	D-1204	~441	Primates	Notharctidae	Cantius	abditus	1	0	0	0	0	lp4-m2
NMNH	495530	D-1204	~441	Primates	Notharctidae	Cantius	abditus	1	0	0	0	0	lp4-m2
NMNH	uncatalogued	D-1204	~441	Primates	Notharctidae	Cantius	abditus	4	4.58	3.36	4.94	4.02	lm1-3, rm1-2, 2 rmx
NMNH	uncatalogued	D-1204	~441	Primates	Notharctidae	Cantius	abditus	1			4.9	3.85	rm1-3
NMNH	uncatalogued	D-1204	~441	Primates	Notharctidae	Cantius	abditus	1	4.94	4.14			lm1-2
NMNH	uncatalogued	D-1204	~441	Primates	Notharctidae	Cantius	abditus	8	4.95	3.89			lm1-2, misc jaws
NMNH	uncatalogued	D-1204	~441	Primates	Notharctidae	Cantius	abditus	1	5.06	4.06			lm1-2
NMNH	538021	D-1204 middle	~441	Primates	Notharctidae	Cantius	abditus	2					L dent m2-m3, r dent m2-m3
NMNH	538023	D-1204 middle	~441	Primates	Notharctidae	Cantius	abditus	1					L dent m2-m3
USGS	4053	D-1294	342	Cimolesta	Cimolestidae	Didelphodus	absarokae	1	0	0	0	0	rM2
USGS	4910	D-1340	364	Cimolesta	Cimolestidae	Didelphodus	absarokae	1	0	0	0	0	lM2
USGS	1804	D-1242	379	Cimolesta	Cimolestidae	Didelphodus	absarokae	1	0	0	0	0	rP3-M1
USGS	9849	D-1538	405	Cimolesta	Cimolestidae	Didelphodus	absarokae	1	0	0	0	0	jaw with rm2
NMNH	487941	D-1538	405	Cimolesta	Cimolestidae	Didelphodus	absarokae	1	0	0	0	0	rm2, p4 erupting
NMNH	511072	D-1350	409	Cimolesta	Cimolestidae	Didelphodus	absarokae	1	0	0	0	0	r and l jaws, stuck together
USGS	6576	D-1454	409	Cimolesta	Cimolestidae	Didelphodus	absarokae	1	0	0	3.82	2.32	rm1, P
USGS	23798	D-1454	409	Cimolesta	Cimolestidae	Didelphodus	absarokae	1	0	0	3.93	2.57	rm1-2, assoc bits
NMNH	493857	D-1454	409	Cimolesta	Cimolestidae	Didelphodus	absarokae	1	0	0	3.76	2.61	r p1-3 roots, rm1
USGS	7325	D-1527	410	Cimolesta	Cimolestidae	Didelphodus	absarokae	1	0	0	0	0	rm2
USGS	9868	D-1539	410	Cimolesta	Cimolestidae	Didelphodus	absarokae	1	3.49	2.47	0	0	lp3, lm1-3
USGS	9854	D-1549	410	Cimolesta	Cimolestidae	Didelphodus	absarokae	1	3.38	2.08	0	0	jaw with lm1
USGS	25488	D-1859	410	Cimolesta	Cimolestidae	Didelphodus	absarokae	1	0	0	3.46	2.52	rm1
USGS	24076	D-1411	412	Cimolesta	Cimolestidae	Didelphodus	absarokae	1	0	0	3.39	2.27	rm1
USGS	24067	D-1762	414	Cimolesta	Cimolestidae	Didelphodus	absarokae	1	3.86	2.32	0	0	lm1
USGS	8806	D-1483	415	Cimolesta	Cimolestidae	Didelphodus	absarokae	1	0	0	0	0	l jaw with m frags
USGS	13781	D-1483	415	Cimolesta	Cimolestidae	Didelphodus	absarokae	1	0	0	0	0	lp2
USGS	8959	D-1443	420	Cimolesta	Cimolestidae	Didelphodus	absarokae	1	0	0	0	0	lm2
NMNH	495477	D-1530	420	Cimolesta	Cimolestidae	Didelphodus	absarokae	1	0	0	0	0	rm2-3
USGS	3949	D-1326	425	Cimolesta	Cimolestidae	Didelphodus	absarokae	1	0	0	3.99	2.45	rp4-m1
USGS	4979	D-1348	430	Cimolesta	Cimolestidae	Didelphodus	absarokae	1	0	0	0	0	l jaw with p1
USGS	4978	D-1349	430	Cimolesta	Cimolestidae	Didelphodus	absarokae	1	0	0	0	0	l jaw with p2
USGS	9855	D-1206	438	Cimolesta	Cimolestidae	Didelphodus	absarokae	1	0	0	3.7	2.44	rm1, rm3
NMNH	521453	D-1320	438	Cimolesta	Cimolestidae	Didelphodus	absarokae	1	0	0	0	0	lp4-m1, covered
NMNH	521454	D-1320	438	Cimolesta	Cimolestidae	Didelphodus	absarokae	1	3.78	2.15	0	0	lp4-m2
USGS	8929	D-1459	438	Cimolesta	Cimolestidae	Didelphodus	absarokae	1	0	0	3.61	2.34	rp3-m1
USGS	6550	D-1452	440	Cimolesta	Cimolestidae	Didelphodus	absarokae	1	3.93	2.83	0	0	lp4-m2, rc-p2, assoc bits
USGS	6558	D-1452	440	Cimolesta	Cimolestidae	Didelphodus	absarokae	1	3.57	2.28	0	0	lm1-2
USGS	3709	D-1310	442	Cimolesta	Cimolestidae	Didelphodus	absarokae	1	3.48	2.42	0	0	lp1-m3
USGS	3710	D-1310	442	Cimolesta	Cimolestidae	Didelphodus	absarokae	1	0	0	3.59	2.52	rp4-m1
NMNH	542116	D-1311	442	Cimolesta	Cimolestidae	Didelphodus	absarokae	1					R dentary with ? p3, and partial max
NMNH	542117	D-1311	442	Cimolesta	Cimolestidae	Didelphodus	absarokae	1					L dentary with m1
USGS	8820	D-1407	442	Cimolesta	Cimolestidae	Didelphodus	absarokae	1	0	0	3.58	2.5	rm1-2
USGS	12928	D-1588	442	Cimolesta	Cimolestidae	Didelphodus	absarokae	1	0	0	0	0	rm3
USGS	17628	D-1657	443	Cimolesta	Cimolestidae	Didelphodus	absarokae	1	0	0	0	0	lP4-M1, assoc frag
USGS	12914	D-1629	445	Cimolesta	Cimolestidae	Didelphodus	absarokae	1	3.4	2.31	0	0	lp3-m2
USGS	9858	D-1537	449	Cimolesta	Cimolestidae	Didelphodus	absarokae	1	0	0	3.41	2.49	rp4-m1
USGS	9859	D-1537	449	Cimolesta	Cimolestidae	Didelphodus	absarokae	1	0	0	3.4	2.38	rm1, assoc jaw frag
USGS	17819	D-1537	449	Cimolesta	Cimolestidae	Didelphodus	absarokae	1	0	0	0	0	lc, lp2-4, rp2-4
USGS	10467	D-1536	450	Cimolesta	Cimolestidae	Didelphodus	absarokae	1	3.59	2.16	0	0	jaw with lm1
USGS	24089	Y-100	455	Cimolesta	Cimolestidae	Didelphodus	absarokae	2	0	0	0	0	misc teeth
USGS	12923	D-1604	463	Cimolesta	Cimolestidae	Didelphodus	absarokae	1	0	0	3.6	2.33	rm1-2
USGS	17617	D-1699	463	Cimolesta	Cimolestidae	Didelphodus	absarokae	1	3.59	2.49	0	0	lp3-m1
USGS	17618	D-1699	463	Cimolesta	Cimolestidae	Didelphodus	absarokae	1	0	0	0	0	rm3
USGS	17630	D-1699	463	Cimolesta	Cimolestidae	Didelphodus	absarokae	1	0	0	3.47	2.57	rp3-m3
USGS	17646	D-1699	463	Cimolesta	Cimolestidae	Didelphodus	absarokae	1	0	0	0	0	lM1-2
USGS	24097	D-1699	463	Cimolesta	Cimolestidae	Didelphodus	absarokae	1	0	0	0	0	lP4-M3, skull pieces
USGS	9807	D-1495	464	Cimolesta	Cimolestidae	Didelphodus	absarokae	1	0	0	0	0	rM2
USGS	24095	D-1737	466	Cimolesta	Cimolestidae	Didelphodus	absarokae	1	3.42	2.31	3.74	2.37	lm1, rp2-3, rm1
NMNH	524124	D-1737	466	Cimolesta	Cimolestidae	Didelphodus	absarokae	1	0	0	0	0	jaw with p2
NMNH	493858	D-1160/1314	470	Cimolesta	Cimolestidae	Didelphodus	absarokae	1	0	0	0	0	rm2-3
USGS	304	Y-45	470	Cimolesta	Cimolestidae	Didelphodus	absarokae	1	0	0	0	0	lp2-3
USGS	305	Y-45	470	Cimolesta	Cimolestidae	Didelphodus	absarokae	1	3.16	2.07	0	0	lm1-2
USGS	316	Y-45	470	Cimolesta	Cimolestidae	Didelphodus	absarokae	1	0	0	0	0	lm2-3
USGS	1291	Y-45	470	Cimolesta	Cimolestidae	Didelphodus	absarokae	1	3.69	2.32	0	0	lp4-m1
USGS	3950	Y-45	470	Cimolesta	Cimolestidae	Didelphodus	absarokae	1	0	0	0	0	rp2-3
USGS	3951	Y-45	470	Cimolesta	Cimolestidae	Didelphodus	absarokae	1	3.43	2.29	0	0	lp2-3, lm1-3
USGS	3952	Y-45	470	Cimolesta	Cimolestidae	Didelphodus	absarokae	1	0	0	0	0	rm2-3
USGS	6280	Y-45	470	Cimolesta	Cimolestidae	Didelphodus	absarokae	1	0	0	3.23	2.29	rp4-m2
USGS	17639	Y-45	470	Cimolesta	Cimolestidae	Didelphodus	absarokae	1	0	0	0	0	lp2-3, lm2-3, rm2-3
NMNH	539554	Y-45	470	Cimolesta	Cimolestidae	Didelphodus	absarokae	1					assoc upper and lower jaws
NMNH	539663	Y-45	470	Cimolesta	Cimolestidae	Didelphodus	absarokae	1			3.04	2.13	R m1-2, L ?p3, assoc
NMNH	540289	Y-45	470	Cimolesta	Cimolestidae	Didelphodus	absarokae	2					L M1-3, R mX
USGS	7260	D-1490	474	Cimolesta	Cimolestidae	Didelphodus	absarokae	1	0	0	3.43	2.44	rm1
USGS	3945	D-1162	481	Cimolesta	Cimolestidae	Didelphodus	absarokae	1	0	0	0	0	rp4
USGS	8357	D-1162	481	Cimolesta	Cimolestidae	Didelphodus	absarokae	1	3.57	2.41	0	0	lp3-m2
USGS	9286	D-1162	481	Cimolesta	Cimolestidae	Didelphodus	absarokae	1	0	0	0	0	rm3
USGS	9157	D-1510	482	Cimolesta	Cimolestidae	Didelphodus	absarokae	1	3.45	2.11	0	0	lm1-2
USGS	3953	D-1307	483	Cimolesta	Cimolestidae	Didelphodus	absarokae	1	0	0	0	0	rp3-m1, covered
USGS	3660	D-1312	483	Cimolesta	Cimolestidae	Didelphodus	absarokae	1	0	0	0	0	lM1-2
USGS	4974	D-1331	483	Cimolesta	Cimolestidae	Didelphodus	absarokae	1	0	0	0	0	rm3
USGS	7985	D-1397	483	Cimolesta	Cimolestidae	Didelphodus	absarokae	1	0	0	0	0	lp2-3, assoc jaw frag
USGS	8200	D-1230	490	Cimolesta	Cimolestidae	Didelphodus	absarokae	1	3.13	2.06	0	0	lm1-2
USGS	9875	D-1426	490	Cimolesta	Cimolestidae	Didelphodus	absarokae	1	0	0	3.59	2.45	rm1-3
USGS	3675	D-1338	491	Cimolesta	Cimolestidae	Didelphodus	absarokae	1	0	0	0	0	lP3-M2
USGS	3681	D-1338	491	Cimolesta	Cimolestidae	Didelphodus	absarokae	1	0	0	0	0	rp4
USGS	4657	D-1338	491	Cimolesta	Cimolestidae	Didelphodus	absarokae	1	0	0	0	0	rP3-4
NMNH	539658	D-1338	491	Cimolesta	Cimolestidae	Didelphodus	absarokae	1					L c1-p2
USGS	3703	D-1345	491	Cimolesta	Cimolestidae	Didelphodus	absarokae	1	0	0	0	0	lm2 frag
NMNH	521774	D-1346	491	Cimolesta	Cimolestidae	Didelphodus	absarokae	1	0	0	0	0	rostrum
USGS	10490	D-1563	493	Cimolesta	Cimolestidae	Didelphodus	absarokae	1	3.57	2.26	0	0	lm1-2
USGS	9388	D-1507	494	Cimolesta	Cimolestidae	Didelphodus	absarokae	1	0	0	0	0	rP3-M1, assoc bits
USGS	17719	D-1507	494	Cimolesta	Cimolestidae	Didelphodus	absarokae	1	3.32	2.33	0	0	lm1-3
USGS	8860	D-1174	501	Cimolesta	Cimolestidae	Didelphodus	absarokae	1	0	0	0	0	lm3
USGS	6303	D-1431	501	Cimolesta	Cimolestidae	Didelphodus	absarokae	1	0	0	3.16	2.38	rm1-3
USGS	6304	D-1431	501	Cimolesta	Cimolestidae	Didelphodus	absarokae	1	0	0	0	0	rm2-3
USGS	6305	D-1431	501	Cimolesta	Cimolestidae	Didelphodus	absarokae	1	0	0	0	0	lp2-4
NMNH	511328	D-1431	501	Cimolesta	Cimolestidae	Didelphodus	absarokae	1	0	0	3.22	2.18	rm1-3
USGS	306	Y-55	501	Cimolesta	Cimolestidae	Didelphodus	absarokae	1	0	0	0	0	upper and lower r and l jaws, squashed
USGS	12942	D-1609	505	Cimolesta	Cimolestidae	Didelphodus	absarokae	1	0	0	0	0	lm2-3
USGS	17655	D-1204	~441	Cimolesta	Cimolestidae	Didelphodus	absarokae	1	0	0	0	0	lp3
USGS	10228	D-1577	311	Tillodontia	Esthonychidae	Esthonyx	acutidens	1	0	0	0	0	ldp4, lM2, assoc frags
USGS	1907	D-1201	344	Tillodontia	Esthonychidae	Esthonyx	acutidens	1	0	0	0	0	rm1-3, broken
USGS	4212	D-1303	360	Tillodontia	Esthonychidae	Esthonyx	acutidens	1	0	0	9.06	6.3	rdp3-m1
USGS	4213	D-1303	360	Tillodontia	Esthonychidae	Esthonyx	acutidens	1	8.47	6.86	0	0	lp4-m1
USGS	7040	D-1387	360	Tillodontia	Esthonychidae	Esthonyx	acutidens	1	0	0	9.12	6.71	rm1
USGS	24580	D-1743	385	Tillodontia	Esthonychidae	Esthonyx	acutidens	1	0	0	0	0	rm3
USGS	26073	D-1792	385	Tillodontia	Esthonychidae	Esthonyx	acutidens	1	8.18	6.21	0	0	lm1-3
USGS	13776	D-1342	390	Tillodontia	Esthonychidae	Esthonyx	acutidens	1	0	0	0	0	rm3
USGS	3557	D-1218	392	Tillodontia	Esthonychidae	Esthonyx	acutidens	1	0	0	0	0	lm1 frag
USGS	9091	D-1222	400	Tillodontia	Esthonychidae	Esthonyx	acutidens	1	0	0	0	0	rp4
USGS	7541	D-1454	409	Tillodontia	Esthonychidae	Esthonyx	acutidens	4	0	0	8.85	6.69	rm1, 2 lp4, rp4
USGS	7763	D-1460	409	Tillodontia	Esthonychidae	Esthonyx	acutidens	1	0	0	0	0	lm2-3
USGS	6081	D-1411	412	Tillodontia	Esthonychidae	Esthonyx	acutidens	1	7.83	6.13	0	0	lm1-3
USGS	8420	D-1410	414	Tillodontia	Esthonychidae	Esthonyx	acutidens	1	7.89	7.03	0	0	lm1-3, rm3
USGS	4269	D-1324	424	Tillodontia	Esthonychidae	Esthonyx	acutidens	2	0	0	0	0	rM2, rM3
USGS	4238	D-1326	425	Tillodontia	Esthonychidae	Esthonyx	acutidens	1	8.72	6.97	8.6	6.31	r and lm1
USGS	4265	D-1326	425	Tillodontia	Esthonychidae	Esthonyx	acutidens	1	0	0	0	0	rp4-m1, broken
USGS	4100	D-1339	452	Tillodontia	Esthonychidae	Esthonyx	acutidens	1	0	0	7.83	6.15	rp4-m3
USGS	9344	D-1497	452	Tillodontia	Esthonychidae	Esthonyx	acutidens	1	0	0	0	0	rp3
USGS	22756	Y-100	455	Tillodontia	Esthonychidae	Esthonyx	acutidens	1	0	0	0	0	lm2
USGS	22757	Y-100	455	Tillodontia	Esthonychidae	Esthonyx	acutidens	1	9.24	6.08	0	0	rdp3-m1
USGS	23652	Y-100	455	Tillodontia	Esthonychidae	Esthonyx	acutidens	2	0	0	0	0	frags
USGS	24591	Y-100	455	Tillodontia	Esthonychidae	Esthonyx	acutidens	1	0	0	0	0	rp4-m1, erupting
USGS	10239	Y-227	457	Tillodontia	Esthonychidae	Esthonyx	acutidens	1	0	0	0	0	ldP4-M1
USGS	13010	Y-227	457	Tillodontia	Esthonychidae	Esthonyx	acutidens	1	0	0	0	0	r and lm2, assoc frags
USGS	13768	Y-227	457	Tillodontia	Esthonychidae	Esthonyx	acutidens	4	0	0	0	0	r and lM1, bits
NMNH	523686	Y-227	457	Tillodontia	Esthonychidae	Esthonyx	acutidens	1	0	0	0	0	ldP3-M1, rdP4-M1
USGS	12973	D-1602	463	Tillodontia	Esthonychidae	Esthonyx	acutidens	1	0	0	0	0	lp2-3, rp2-4, rdP3-M1
USGS	12974	D-1603	463	Tillodontia	Esthonychidae	Esthonyx	acutidens	1	0	0	0	0	rP4-M1
USGS	22751	D-1603	463	Tillodontia	Esthonychidae	Esthonyx	acutidens	1	0	0	0	0	lm2, lm3, assoc bits
USGS	13002	D-1604	463	Tillodontia	Esthonychidae	Esthonyx	acutidens	1	8.76	6.24	0	0	ldp3-m1
USGS	19337	D-1699	463	Tillodontia	Esthonychidae	Esthonyx	acutidens	1	0	0	0	0	lp3
USGS	19377	D-1699	463	Tillodontia	Esthonychidae	Esthonyx	acutidens	1	0	0	0	0	rP3-M2
USGS	19378	D-1699	463	Tillodontia	Esthonychidae	Esthonyx	acutidens	2	0	0	0	0	lm3, m frag
USGS	19380	D-1699	463	Tillodontia	Esthonychidae	Esthonyx	acutidens	1	0	0	8.58	5.96	rm1-2
USGS	23664	D-1699	463	Tillodontia	Esthonychidae	Esthonyx	acutidens	4	0	0	0	0	lm2, rm3, lM, rdp4
USGS	24602	D-1699	463	Tillodontia	Esthonychidae	Esthonyx	acutidens	1	0	0	8.46	5.91	rm1-3
NMNH	523688	D-1699	463	Tillodontia	Esthonychidae	Esthonyx	acutidens	1	0	0	8.61	6.82	rm1, lM
NMNH	523689	D-1699	463	Tillodontia	Esthonychidae	Esthonyx	acutidens	1	0	0	0	0	rdp4, assoc jaw frags
USGS	24587	D-1776	463	Tillodontia	Esthonychidae	Esthonyx	acutidens	3	0	0	0	0	rm3, m frags
USGS	24592	D-1776	463	Tillodontia	Esthonychidae	Esthonyx	acutidens	5	0	0	9.12	6.08	rp4, rm1, misc frags
USGS	26054	D-1833	463	Tillodontia	Esthonychidae	Esthonyx	acutidens	1	8.62	6.3	8.69	6.26	ldp3-m1, rdp4-m1
USGS	26055	D-1833	463	Tillodontia	Esthonychidae	Esthonyx	acutidens	4	0	0	0	0	lm3, misc teeth
USGS	27015	D-1833	463	Tillodontia	Esthonychidae	Esthonyx	acutidens	6	8.24	6.17	0	0	lm1, misc teeth incl p
NMNH	523690	D-1833	463	Tillodontia	Esthonychidae	Esthonyx	acutidens	2	0	0	8.56	6.58	rm1, rm3
NMNH	523691	D-1833	463	Tillodontia	Esthonychidae	Esthonyx	acutidens	1	0	0	0	0	rm2-3, assoc ant teeth and bits
USGS	26894	D-1881	463	Tillodontia	Esthonychidae	Esthonyx	acutidens	1	0	0	0	0	lM2
NMNH	523692	D-1881	463	Tillodontia	Esthonychidae	Esthonyx	acutidens	1	7.47	6.42	0	0	lp4-m3, rm1 frag, assoc uppers
USGS	9786	D-1495	464	Tillodontia	Esthonychidae	Esthonyx	acutidens	1	0	0	8.18	6.52	rm1-3
USGS	9787	D-1495	464	Tillodontia	Esthonychidae	Esthonyx	acutidens	2	0	0	0	0	misc uppers
USGS	12997	D-1495	464	Tillodontia	Esthonychidae	Esthonyx	acutidens	1	0	0	0	0	rP3-M3
USGS	12998	D-1495	464	Tillodontia	Esthonychidae	Esthonyx	acutidens	3	8.61	5.62	0	0	lp4, lm1, lm2
USGS	12999	D-1495	464	Tillodontia	Esthonychidae	Esthonyx	acutidens	2	0	0	0	0	misc upper frags
NMNH	523693	D-1676	464	Tillodontia	Esthonychidae	Esthonyx	acutidens	1	0	0	0	0	lM1-2
USGS	8513	D-1425	465	Tillodontia	Esthonychidae	Esthonyx	acutidens	1	0	0	0	0	assoc uppers and pieces
USGS	19354	D-1668/1669/1670	465	Tillodontia	Esthonychidae	Esthonyx	acutidens	1	0	0	0	0	lp4
USGS	22749	D-1737	466	Tillodontia	Esthonychidae	Esthonyx	acutidens	1	0	0	0	0	rM1-3
USGS	22750	D-1737	466	Tillodontia	Esthonychidae	Esthonyx	acutidens	4	0	0	8.68	5.86	rm1, rm2, m frag, upper
USGS	23667	D-1737	466	Tillodontia	Esthonychidae	Esthonyx	acutidens	4	0	0	0	0	lm2, rm3, m frags
USGS	24585	D-1737	466	Tillodontia	Esthonychidae	Esthonyx	acutidens	1	0	0	0	0	rp3-4
USGS	24598	D-1757	468	Tillodontia	Esthonychidae	Esthonyx	acutidens	1	0	0	8.54	6.17	rm1-3, assoc frags
USGS	23671	Y-34	469	Tillodontia	Esthonychidae	Esthonyx	acutidens	1	8.29	6.51	8.36	6.51	r and ldp4-erupting m3
USGS	1722	D-1160/1314	470	Tillodontia	Esthonychidae	Esthonyx	acutidens	2	0	0	8.44	6.43	rm1, m frag
USGS	4261	D-1160/1314	470	Tillodontia	Esthonychidae	Esthonyx	acutidens	1	0	0	0	0	rm3
NMNH	523694	D-1160/1314	470	Tillodontia	Esthonychidae	Esthonyx	acutidens	1	0	0	0	0	rdp4, assoc frags
NMNH	523695	D-1160/1314	470	Tillodontia	Esthonychidae	Esthonyx	acutidens	1	0	0	8.42	5.88	rdp2-m1, c
USGS	1093	Y-45	470	Tillodontia	Esthonychidae	Esthonyx	acutidens	1	0	0	0	0	lp3-m3, broken
USGS	1094	Y-45	470	Tillodontia	Esthonychidae	Esthonyx	acutidens	3	0	0	0	0	misc uppers
USGS	1235	Y-45	470	Tillodontia	Esthonychidae	Esthonyx	acutidens	1	0	0	0	0	rp3
USGS	1262	Y-45	470	Tillodontia	Esthonychidae	Esthonyx	acutidens	1	0	0	0	0	lM1
USGS	8905	Y-45	470	Tillodontia	Esthonychidae	Esthonyx	acutidens	1	8.43	6.73	0	0	lm1
USGS	9069	Y-45	470	Tillodontia	Esthonychidae	Esthonyx	acutidens	1	0	0	0	0	lP4
USGS	9356	Y-45	470	Tillodontia	Esthonychidae	Esthonyx	acutidens	2	0	0	0	0	lm3 frag, upper frag
USGS	13006	Y-45	470	Tillodontia	Esthonychidae	Esthonyx	acutidens	2	0	0	0	0	lM1, lM2
USGS	13007	Y-45	470	Tillodontia	Esthonychidae	Esthonyx	acutidens	1	0	0	0	0	assoc I
NMNH	490653	Y-45	470	Tillodontia	Esthonychidae	Esthonyx	acutidens	1	0	0	0	0	assoc bones
USGS	24589	D-1777	474	Tillodontia	Esthonychidae	Esthonyx	acutidens	3	0	0	0	0	ldp4, misc uppers
USGS	7284	D-1511	478	Tillodontia	Esthonychidae	Esthonyx	acutidens	1	8.21	6.05	0	0	lm1-2
USGS	13003	D-1511	478	Tillodontia	Esthonychidae	Esthonyx	acutidens	1	0	0	0	0	lP3-M1
USGS	22753	D-1727	478	Tillodontia	Esthonychidae	Esthonyx	acutidens	1	0	0	0	0	lP4-M1
USGS	23665	D-1727	478	Tillodontia	Esthonychidae	Esthonyx	acutidens	1	0	0	0	0	I
USGS	1022	D-1162	481	Tillodontia	Esthonychidae	Esthonyx	acutidens	1	0	0	0	0	r and lm2, assoc frags
USGS	4204	D-1162	481	Tillodontia	Esthonychidae	Esthonyx	acutidens	2	0	0	0	0	misc uppers
USGS	4218	D-1162	481	Tillodontia	Esthonychidae	Esthonyx	acutidens	1	0	0	8.79	6.25	rdp4-m2
USGS	4219	D-1162	481	Tillodontia	Esthonychidae	Esthonyx	acutidens	1	8.44	6.25	0	0	lp4-m2
USGS	4220	D-1162	481	Tillodontia	Esthonychidae	Esthonyx	acutidens	1	8.68	6.43	0	0	lm1
USGS	4221	D-1162	481	Tillodontia	Esthonychidae	Esthonyx	acutidens	4	0	0	0	0	misc
USGS	4255	D-1162	481	Tillodontia	Esthonychidae	Esthonyx	acutidens	1	0	0	0	0	lP4
USGS	5285	D-1162	481	Tillodontia	Esthonychidae	Esthonyx	acutidens	1	8.87	6.69	8.7	6.44	heavily worn skull and jaws
USGS	8360	D-1162	481	Tillodontia	Esthonychidae	Esthonyx	acutidens	5	0	0	0	0	lm3, rM, misc I
USGS	8361	D-1162	481	Tillodontia	Esthonychidae	Esthonyx	acutidens	1	0	0	0	0	ldP4-M1
USGS	9291	D-1162	481	Tillodontia	Esthonychidae	Esthonyx	acutidens	2	8.99	6.41	0	0	lm1, rdP4
USGS	1554	D-1166	481	Tillodontia	Esthonychidae	Esthonyx	acutidens	1	8.73	6.61	0	0	lm1-2
USGS	1555	D-1166	481	Tillodontia	Esthonychidae	Esthonyx	acutidens	1	0	0	0	0	lm2
USGS	1556	D-1166	481	Tillodontia	Esthonychidae	Esthonyx	acutidens	1	0	0	0	0	lM1
USGS	1956	D-1197	481	Tillodontia	Esthonychidae	Esthonyx	acutidens	2	0	0	0	0	lm2 frag, lM
USGS	1477	D-1229	481	Tillodontia	Esthonychidae	Esthonyx	acutidens	3	9.02	6.6	0	0	lm1, lm2, lM2-3
USGS	4245	D-1316	481	Tillodontia	Esthonychidae	Esthonyx	acutidens	1	0	0	0	0	rm3
USGS	9459	D-1515	482	Tillodontia	Esthonychidae	Esthonyx	acutidens	8	0	0	0	0	misc m and M frags
USGS	10253	D-1515	482	Tillodontia	Esthonychidae	Esthonyx	acutidens	1	0	0	0	0	lP4-M1
USGS	10255	D-1515	482	Tillodontia	Esthonychidae	Esthonyx	acutidens	1	8.44	6.6	0	0	lp4-m2, assoc bits
NMNH	495331	D-1515	482	Tillodontia	Esthonychidae	Esthonyx	acutidens	1	0	0	0	0	skull with ant teeth
NMNH	487889	D-1994	482	Tillodontia	Esthonychidae	Esthonyx	acutidens	1	7.78	6.72	0	0	lp4-m3
NMNH	521716	RB-12	482	Tillodontia	Esthonychidae	Esthonyx	acutidens	1	0	0	0	0	rdP3
USGS	8407	D-1397	483	Tillodontia	Esthonychidae	Esthonyx	acutidens	2	8.48	7.01	0	0	lp3, lm1
USGS	23661	D-1532	485	Tillodontia	Esthonychidae	Esthonyx	acutidens	2	8.45	7.04	0	0	lm1, lm3
USGS	10238	D-1552	485	Tillodontia	Esthonychidae	Esthonyx	acutidens	2	0	0	0	0	lM1, jaw frag
USGS	7060	D-1491	486	Tillodontia	Esthonychidae	Esthonyx	acutidens	1	0	0	0	0	lM1-2
USGS	8397	Y-47	489	Tillodontia	Esthonychidae	Esthonyx	acutidens	1	0	0	0	0	rm3
USGS	1459	D-1230	490	Tillodontia	Esthonychidae	Esthonyx	acutidens	5	8.32	6.63	0	0	rm1, lp4, misc uppers
USGS	7895	D-1230	490	Tillodontia	Esthonychidae	Esthonyx	acutidens	3	0	0	8.64	6.28	rm1, lM1, I
USGS	8187	D-1230	490	Tillodontia	Esthonychidae	Esthonyx	acutidens	1	0	0	0	0	rm2
USGS	19335	D-1230	490	Tillodontia	Esthonychidae	Esthonyx	acutidens	3	0	0	0	0	misc uppers
USGS	3700	D-1345	491	Tillodontia	Esthonychidae	Esthonyx	acutidens	1	8.34	6.66	0	0	lm1, lM frag
USGS	8608	D-1345	491	Tillodontia	Esthonychidae	Esthonyx	acutidens	1	0	0	8.68	6.35	rm1
USGS	4224	D-1346	491	Tillodontia	Esthonychidae	Esthonyx	acutidens	1	0	0	0	0	rp3
NMNH	523696	D-1346	491	Tillodontia	Esthonychidae	Esthonyx	acutidens	2	0	0	0	0	lP4, I
USGS	8685	D-1469	491	Tillodontia	Esthonychidae	Esthonyx	acutidens	2	0	0	0	0	lm2 frag, lM1-2
USGS	8738	D-1471	491	Tillodontia	Esthonychidae	Esthonyx	acutidens	2	0	0	0	0	lM3, M frag
USGS	8022	D-1436	492	Tillodontia	Esthonychidae	Esthonyx	acutidens	1	8.18	6.55	0	0	lp3-m3
USGS	8789	D-1436	492	Tillodontia	Esthonychidae	Esthonyx	acutidens	6	0	0	0	0	misc teeth
USGS	13673	D-1436	492	Tillodontia	Esthonychidae	Esthonyx	acutidens	2	0	0	0	0	upper frag, I
NMNH	521766	D-1436	492	Tillodontia	Esthonychidae	Esthonyx	acutidens	1	0	0	0	0	lp3
USGS	19339	D-1563	493	Tillodontia	Esthonychidae	Esthonyx	acutidens	1	0	0	0	0	rM1-2
USGS	23662	D-1563	493	Tillodontia	Esthonychidae	Esthonyx	acutidens	1	0	0	0	0	rM
USGS	9417	D-1507	494	Tillodontia	Esthonychidae	Esthonyx	acutidens	1	8.63	5.92	0	0	lp4-m1
USGS	27003	D-1910	494	Tillodontia	Esthonychidae	Esthonyx	acutidens	1	0	0	0	0	lP4
NMNH	523697	D-1434	496	Tillodontia	Esthonychidae	Esthonyx	acutidens	1	0	0	0	0	rm2 talonid
USGS	7706	D-1474	496	Tillodontia	Esthonychidae	Esthonyx	acutidens	3	0	0	0	0	rm2, misc M and m frags
USGS	8734	D-1475	496	Tillodontia	Esthonychidae	Esthonyx	acutidens	1	0	0	0	0	lP4
USGS	7887	D-1174	501	Tillodontia	Esthonychidae	Esthonyx	acutidens	1	0	0	0	0	lm2-3, assoc bits
NMNH	523698	D-1174	501	Tillodontia	Esthonychidae	Esthonyx	acutidens	2	0	0	0	0	lM, c
USGS	8480	D-1175	501	Tillodontia	Esthonychidae	Esthonyx	acutidens	4	0	0	0	0	lm2, misc uppers
USGS	8435	D-1431	501	Tillodontia	Esthonychidae	Esthonyx	acutidens	1	0	0	0	0	rm2
NMNH	495158	D-1431	501	Tillodontia	Esthonychidae	Esthonyx	acutidens	1	8.76	6.39	8.92	6.99	ri2-m3, lp3-m3, assoc bits
NMNH	495175	D-1431	501	Tillodontia	Esthonychidae	Esthonyx	acutidens	3	0	0	0	0	rp4, rM, rm3
USGS	22760	D-1432	501	Tillodontia	Esthonychidae	Esthonyx	acutidens	1	0	0	0	0	lp4
USGS	22761	D-1432	501	Tillodontia	Esthonychidae	Esthonyx	acutidens	1	0	0	0	0	P frag
USGS	22762	D-1432	501	Tillodontia	Esthonychidae	Esthonyx	acutidens	1	0	0	0	0	lm2
USGS	22763	D-1432	501	Tillodontia	Esthonychidae	Esthonyx	acutidens	2	0	0	0	0	misc frags
USGS	8718	D-1433	501	Tillodontia	Esthonychidae	Esthonyx	acutidens	1	0	0	0	0	rM2
USGS	8306	D-1468	501	Tillodontia	Esthonychidae	Esthonyx	acutidens	1	0	0	8.45	6.47	rdp4-m1
NMNH	523699	WW-54	501	Tillodontia	Esthonychidae	Esthonyx	acutidens	1	0	0	0	0	lm1-3, broken, assoc uppers
USGS	8546	Y-39	501	Tillodontia	Esthonychidae	Esthonyx	acutidens	1	0	0	0	0	li2-p4, assoc bits
USGS	8629	Y-39	501	Tillodontia	Esthonychidae	Esthonyx	acutidens	2	0	0	0	0	lm2, m frag
NMNH	495164	Y-39	501	Tillodontia	Esthonychidae	Esthonyx	acutidens	1	0	0	0	0	lm2-3
USGS	12967	D-1609	505	Tillodontia	Esthonychidae	Esthonyx	acutidens	1	0	0	0	0	rP4-M1
USGS	10361	D-1577	311	Carnivora	Viverravidae	Viverravus	acutus	1	0	0	0	0	lM1-2
USGS	13659	D-1373	337	Carnivora	Viverravidae	Viverravus	acutus	1	0	0	5.89	3.33	rp4-m1
USGS	4881	D-1335	341	Carnivora	Viverravidae	Viverravus	acutus	2	0	0	3.76	2.32	rm1, m frag
USGS	8373	D-1335	341	Carnivora	Viverravidae	Viverravus	acutus	1	0	0	0	0	rp4
USGS	4994	D-1289	342	Carnivora	Viverravidae	Viverravus	acutus	1	0	0	0	0	lp2-3
USGS	1905	D-1201	344	Carnivora	Viverravidae	Viverravus	acutus	1	4.17	2.85	0	0	lm1
USGS	1975	D-1201	344	Carnivora	Viverravidae	Viverravus	acutus	1	0	0	0	0	rm2
USGS	7002	D-1201	344	Carnivora	Viverravidae	Viverravus	acutus	1	0	0	0	0	lp3-4, P
USGS	7003	D-1201	344	Carnivora	Viverravidae	Viverravus	acutus	1	0	0	0	0	rm2, p frag
USGS	13686	D-1493	344	Carnivora	Viverravidae	Viverravus	acutus	1	0	0	3.97	2.42	rm1-2
USGS	4858	D-1287	346	Carnivora	Viverravidae	Viverravus	acutus	1	0	0	0	0	rm2
USGS	4860	D-1287	346	Carnivora	Viverravidae	Viverravus	acutus	1	0	0	0	0	rp2
USGS	4851	D-1299	352	Carnivora	Viverravidae	Viverravus	acutus	1	0	0	4.87	2.63	rm1
USGS	8916	D-1415	354	Carnivora	Viverravidae	Viverravus	acutus	1	0	0	0	0	rp4
USGS	10454	D-1303	360	Carnivora	Viverravidae	Viverravus	acutus	1	0	0	0	0	lp3
NMNH	510996	D-1388	360	Carnivora	Viverravidae	Viverravus	acutus	1	0	0	6.11	3.08	rm1
NMNH	510995	Y-132/D-1332	360	Carnivora	Viverravidae	Viverravus	acutus	1	0	0	0	0	lp4
USGS	12781	D-1251	378	Carnivora	Viverravidae	Viverravus	acutus	1	4.77	2.87	0	0	lm1
NMNH	493838	D-1221	384	Carnivora	Viverravidae	Viverravus	acutus	1	0	0	0	0	lm1-2, broken
USGS	10412	D-1556	397	Carnivora	Viverravidae	Viverravus	acutus	1	0	0	4.58	2.46	rp4-m1
USGS	15879	D-1538	405	Carnivora	Viverravidae	Viverravus	acutus	1	0	0	0	0	rp4
NMNH	493859	D-1538	405	Carnivora	Viverravidae	Viverravus	acutus	1	0	0	0	0	rm2
NMNH	511011	D-1538	405	Carnivora	Viverravidae	Viverravus	acutus	1	0	0	0	0	lm1 broken
USGS	27268	Y-461	405	Carnivora	Viverravidae	Viverravus	acutus	1	0	0	0	0	rp4
USGS	23809	D-1350	409	Carnivora	Viverravidae	Viverravus	acutus	1	0	0	0	0	palate, lP2-M1, rP3
NMNH	511198	D-1350	409	Carnivora	Viverravidae	Viverravus	acutus	1	4.61	2.88	0	0	lm1-2
NMNH	511199	D-1350	409	Carnivora	Viverravidae	Viverravus	acutus	1	0	0	4.73	2.67	rm1-2
USGS	7518	D-1454	409	Carnivora	Viverravidae	Viverravus	acutus	1	4.78	3.16	4.5	2.93	lp4-m2, rm1, squashed together
USGS	7519	D-1454	409	Carnivora	Viverravidae	Viverravus	acutus	2	4.94	2.8	0	0	lm1, lm1 trigonid
USGS	25459	D-1454	409	Carnivora	Viverravidae	Viverravus	acutus	1	0	0	0	0	lp4-m1, broken
USGS	7775	D-1460	409	Carnivora	Viverravidae	Viverravus	acutus	1	0	0	0	0	2 jaw frags
USGS	9346	D-1460	409	Carnivora	Viverravidae	Viverravus	acutus	1	0	0	0	0	lM1
USGS	27201	D-1779	412	Carnivora	Viverravidae	Viverravus	acutus	1	0	0	0	0	lp4
USGS	27774	D-1774	413	Carnivora	Viverravidae	Viverravus	acutus	1	0	0	0	0	r and ljaws smashed together
USGS	8424	D-1410	414	Carnivora	Viverravidae	Viverravus	acutus	1	0	0	0	0	l jaw frag
USGS	13682	D-1410	414	Carnivora	Viverravidae	Viverravus	acutus	1	0	0	0	0	r jaw frag
USGS	7073	D-1530	420	Carnivora	Viverravidae	Viverravus	acutus	1	0	0	4.36	2.72	rm1-2
USGS	27164	D-1866	423	Carnivora	Viverravidae	Viverravus	acutus	1	0	0	0	0	rm1-2, broken
USGS	4888	D-1324	424	Carnivora	Viverravidae	Viverravus	acutus	1	0	0	0	0	l jaw frag
USGS	4928	D-1326	425	Carnivora	Viverravidae	Viverravus	acutus	1	5.47	3.09	0	0	lp4-m1
USGS	4929	D-1326	425	Carnivora	Viverravidae	Viverravus	acutus	1	5.12	2.7	0	0	lp4-m2
USGS	4930	D-1326	425	Carnivora	Viverravidae	Viverravus	acutus	5	0	0	0	0	misc teeth
USGS	10289	Y-251	430	Carnivora	Viverravidae	Viverravus	acutus	1	0	0	0	0	r and l jaws stuck together
NMNH	521450	D-1206	438	Carnivora	Viverravidae	Viverravus	acutus	1	0	0	0	0	lm2
USGS	7594	D-1452	440	Carnivora	Viverravidae	Viverravus	acutus	1	0	0	0	0	rp3-4
USGS	4892	D-1310	442	Carnivora	Viverravidae	Viverravus	acutus	1	0	0	0	0	rM1-2
USGS	4893	D-1310	442	Carnivora	Viverravidae	Viverravus	acutus	1	0	0	0	0	rP4
USGS	16056	D-1310	442	Carnivora	Viverravidae	Viverravus	acutus	1	0	0	0	0	lP4
USGS	4920	D-1311	442	Carnivora	Viverravidae	Viverravus	acutus	1	0	0	0	0	rp4-m1, broken
NMNH	533532	D-1311	442	Carnivora	Viverravidae	Viverravus	acutus	1					lm2-3
NMNH	533533	D-1311	442	Carnivora	Viverravidae	Viverravus	acutus	2	5.33	2.83			rm3, lp4-m1
NMNH	541695	D-1311	442	Carnivora	Viverravidae	Viverravus	acutus	1	4.64	2.93			L dentary with p4 frag, m1-2
NMNH	523991	D-1657	443	Carnivora	Viverravidae	Viverravus	acutus	1	0	0	4.99	2.87	rp4-m1
USGS	15929	D-1429	446	Carnivora	Viverravidae	Viverravus	acutus	1	0	0	0	0	rp4
USGS	10379	D-1537	449	Carnivora	Viverravidae	Viverravus	acutus	1	4.93	2.44	0	0	lp4-m2
USGS	15986	D-1599	449	Carnivora	Viverravidae	Viverravus	acutus	1	0	0	0	0	2 jaws squashed together
USGS	10395	D-1536	450	Carnivora	Viverravidae	Viverravus	acutus	1	0	0	0	0	lp4
USGS	1961	D-1209	452	Carnivora	Viverravidae	Viverravus	acutus	1	0	0	0	0	lp3
USGS	9193	D-1497	452	Carnivora	Viverravidae	Viverravus	acutus	1	0	0	5.85	3.23	rp3-m2
USGS	9270	D-1497	452	Carnivora	Viverravidae	Viverravus	acutus	1	0	0	0	0	rp4-m1, broken
USGS	25774	D-1430	455	Carnivora	Viverravidae	Viverravus	acutus	1	0	0	0	0	upper and lower jaws squashed together
USGS	190	D-1210	458	Carnivora	Viverravidae	Viverravus	acutus	1	0	0	0	0	rp4
NMNH	527536	D-1602	463	Carnivora	Viverravidae	Viverravus	acutus	1					L mand w/ c-p4, m1 talonid; R mand w/ p3, p4-m2 (broken); R max w/ M2; distal femur (assoc)
USGS	15850	D-1603	463	Carnivora	Viverravidae	Viverravus	acutus	1	0	0	0	0	lm1-2, covered
NMNH	511102	D-1699	463	Carnivora	Viverravidae	Viverravus	acutus	1	0	0	5.73	3.51	rp4-m1
NMNH	523993	D-1699	463	Carnivora	Viverravidae	Viverravus	acutus	1	0	0	0	0	rp4-m2, covered
USGS	27196	D-1833	463	Carnivora	Viverravidae	Viverravus	acutus	1	0	0	0	0	lm1-2, broken
USGS	9780	D-1495	464	Carnivora	Viverravidae	Viverravus	acutus	1	0	0	4.4	2.87	rm1
USGS	13024	D-1495	464	Carnivora	Viverravidae	Viverravus	acutus	2	0	0	0	0	misc tooth frags
NMNH	524005	D-1737	466	Carnivora	Viverravidae	Viverravus	acutus	2	5.46	2.9	5.07	3.15	lm1, rp4-m2
USGS	4988	D-1160/1314	470	Carnivora	Viverravidae	Viverravus	acutus	1	0	0	0	0	rm1 frag
USGS	188	Y-45	470	Carnivora	Viverravidae	Viverravus	acutus	1	0	0	0	0	rp4
USGS	1218	Y-45	470	Carnivora	Viverravidae	Viverravus	acutus	1	5.05	2.8	0	0	lm1-2
USGS	1220	Y-45	470	Carnivora	Viverravidae	Viverravus	acutus	1	0	0	5.34	2.83	rm1
USGS	1312	Y-45	470	Carnivora	Viverravidae	Viverravus	acutus	3	0	0	0	0	misc jaw frags
USGS	1313	Y-45	470	Carnivora	Viverravidae	Viverravus	acutus	1	5.21	3.11	0	0	lm1-2
USGS	1314	Y-45	470	Carnivora	Viverravidae	Viverravus	acutus	1	0	0	0	0	rP4-M1
USGS	1315	Y-45	470	Carnivora	Viverravidae	Viverravus	acutus	1	0	0	0	0	lp4-m1, covered
USGS	1316	Y-45	470	Carnivora	Viverravidae	Viverravus	acutus	1	5.08	3.02	0	0	lm1-2
USGS	1317	Y-45	470	Carnivora	Viverravidae	Viverravus	acutus	1	0	0	0	0	lP4-M1
USGS	1328	Y-45	470	Carnivora	Viverravidae	Viverravus	acutus	1	0	0	0	0	lp4
USGS	4960	Y-45	470	Carnivora	Viverravidae	Viverravus	acutus	1	4.89	2.44	0	0	lm1-2
USGS	5008	Y-45	470	Carnivora	Viverravidae	Viverravus	acutus	1	0	0	5.07	2.63	rp4-m1
USGS	6281	Y-45	470	Carnivora	Viverravidae	Viverravus	acutus	1	0	0	0	0	lm2
USGS	6282	Y-45	470	Carnivora	Viverravidae	Viverravus	acutus	1	5.03	2.87	0	0	lp4-m1
USGS	6283	Y-45	470	Carnivora	Viverravidae	Viverravus	acutus	1	0	0	0	0	rM1-2
USGS	8380	Y-45	470	Carnivora	Viverravidae	Viverravus	acutus	1	5.08	2.94	0	0	lp4-m1
USGS	8906	Y-45	470	Carnivora	Viverravidae	Viverravus	acutus	2	0	0	0	0	rm1 trigonid, rm2
NMNH	540286	Y-45	470	Carnivora	Viverravidae	Viverravus	acutus	1					L p4-m1 (broken)
USGS	24499	D-1778	474	Carnivora	Viverravidae	Viverravus	acutus	1	0	0	0	0	lp4
NMNH	523705	D-1511	478	Carnivora	Viverravidae	Viverravus	acutus	1	0	0	0	0	skull
USGS	27188	D-1727	478	Carnivora	Viverravidae	Viverravus	acutus	1	0	0	0	0	lm2
USGS	1012	D-1162	481	Carnivora	Viverravidae	Viverravus	acutus	1	0	0	0	0	lp1-2
USGS	1014	D-1162	481	Carnivora	Viverravidae	Viverravus	acutus	1	0	0	5.11	3.02	rp3-m2
USGS	4870	D-1162	481	Carnivora	Viverravidae	Viverravus	acutus	1	0	0	0	0	rm1 broken
USGS	4871	D-1162	481	Carnivora	Viverravidae	Viverravus	acutus	1	0	0	0	0	rP4
USGS	4872	D-1162	481	Carnivora	Viverravidae	Viverravus	acutus	1	0	0	5.36	2.94	rm1
USGS	187	D-1177	481	Carnivora	Viverravidae	Viverravus	acutus	1	0	0	0	0	rp3-4
USGS	191	D-1177	481	Carnivora	Viverravidae	Viverravus	acutus	1	5.27	2.84	0	0	lp4-m1
USGS	192	D-1177	481	Carnivora	Viverravidae	Viverravus	acutus	1	5.3	2.9	0	0	lp4-m2
USGS	8459	D-1177	481	Carnivora	Viverravidae	Viverravus	acutus	1	5.38	2.87	0	0	lm1-2
NMNH	540333	D-1177	481	Carnivora	Viverravidae	Viverravus	acutus	1					R dentary with p3-4
USGS	8565	D-1197	481	Carnivora	Viverravidae	Viverravus	acutus	1	0	0	0	0	rp3-m1, broken
USGS	9442	D-1510	482	Carnivora	Viverravidae	Viverravus	acutus	1	5.3	2.94	0	0	lp4-m1
USGS	9475	D-1510	482	Carnivora	Viverravidae	Viverravus	acutus	1	5.29	2.97	0	0	lp4-m2
USGS	9476	D-1510	482	Carnivora	Viverravidae	Viverravus	acutus	1	0	0	0	0	l jaw frag
USGS	9477	D-1510	482	Carnivora	Viverravidae	Viverravus	acutus	1	0	0	0	0	lm2
USGS	10333	D-1510	482	Carnivora	Viverravidae	Viverravus	acutus	2	4.52	2.46	0	0	lm1, jaw frag
USGS	10334	D-1510	482	Carnivora	Viverravidae	Viverravus	acutus	1	0	0	5.1	2.98	rm1-2
USGS	10335	D-1510	482	Carnivora	Viverravidae	Viverravus	acutus	1	4.72	3.02	0	0	lm1-2
USGS	10336	D-1510	482	Carnivora	Viverravidae	Viverravus	acutus	1	0	0	0	0	lp2
NMNH	511126	D-1510	482	Carnivora	Viverravidae	Viverravus	acutus	1	0	0	5.45	2.86	rp4-m2
NMNH	511039	D-1994	482	Carnivora	Viverravidae	Viverravus	acutus	1	0	0	0	0	lp4-m1, broken
NMNH	521403	D-1994	482	Carnivora	Viverravidae	Viverravus	acutus	1	0	0	5.45	2.99	rm1-2
USGS	4886	D-1312	483	Carnivora	Viverravidae	Viverravus	acutus	1	0	0	0	0	rp4
USGS	15861	D-1317	483	Carnivora	Viverravidae	Viverravus	acutus	1	0	0	0	0	jaw frag
NMNH	540291	D-1397	483	Carnivora	Viverravidae	Viverravus	acutus	1			5.59	2.86	R m1
USGS	27263	D-1531	485	Carnivora	Viverravidae	Viverravus	acutus	1	5.46	3.16	0	0	lp4-m1
USGS	27190	D-1532	485	Carnivora	Viverravidae	Viverravus	acutus	1	4.69	2.75	0	0	r and lm1-2, broken
USGS	27271	D-1532	485	Carnivora	Viverravidae	Viverravus	acutus	1	0	0	5.74	2.9	rp3-m2
USGS	25425	D-1983	488	Carnivora	Viverravidae	Viverravus	acutus	1	0	0	4.79	3.09	rp4-m2
USGS	1455	D-1230	490	Carnivora	Viverravidae	Viverravus	acutus	2	0	0	5.28	3.07	rm1, r jaw frag
USGS	8195	D-1230	490	Carnivora	Viverravidae	Viverravus	acutus	1	0	0	5.27	3.08	rm1
USGS	8196	D-1230	490	Carnivora	Viverravidae	Viverravus	acutus	1	0	0	0	0	lM1
NMNH	541925	D-1230	490	Carnivora	Viverravidae	Viverravus	acutus	1					R & L dentaries with R & L p4-m1 (stuck together and covered)
NMNH	uncatalogued	D-1230	490	Carnivora	Viverravidae	Viverravus	acutus	2					jaw frags
USGS	1830	D-1163	491	Carnivora	Viverravidae	Viverravus	acutus	1	5.26	3.09	0	0	lm1
USGS	4935	D-1338	491	Carnivora	Viverravidae	Viverravus	acutus	1	5.24	3.24	0	0	lp4-m2
USGS	4940	D-1338	491	Carnivora	Viverravidae	Viverravus	acutus	1	0	0	4.99	3.18	rp4-m2
USGS	4942	D-1338	491	Carnivora	Viverravidae	Viverravus	acutus	1	0	0	5.13	3.2	rp4
USGS	4943	D-1338	491	Carnivora	Viverravidae	Viverravus	acutus	1	0	0	0	0	jaw frag
USGS	4945	D-1338	491	Carnivora	Viverravidae	Viverravus	acutus	1	0	0	5.3	3.14	rp4-m1
NMNH	495145	D-1338	491	Carnivora	Viverravidae	Viverravus	acutus	1	0	0	0	0	lp4-m2, covered
USGS	4951	D-1345	491	Carnivora	Viverravidae	Viverravus	acutus	1	0	0	0	0	lp3
USGS	8612	D-1345	491	Carnivora	Viverravidae	Viverravus	acutus	1	0	0	5.35	2.98	rm1
USGS	13662	D-1345	491	Carnivora	Viverravidae	Viverravus	acutus	1	0	0	0	0	lm2
USGS	5017	D-1346	491	Carnivora	Viverravidae	Viverravus	acutus	1	0	0	0	0	broken rm1
USGS	8684	D-1469	491	Carnivora	Viverravidae	Viverravus	acutus	1	0	0	0	0	rP4
USGS	8593	D-1470	491	Carnivora	Viverravidae	Viverravus	acutus	1	0	0	0	0	rm1-2, broken
NMNH	539581	D-1471	491	Carnivora	Viverravidae	Viverravus	acutus	2					L jaw with p4-m1 frags, R p4
USGS	1704	Y-27	491	Carnivora	Viverravidae	Viverravus	acutus	1	0	0	5.52	3.26	rm1
USGS	1599	Y-28	491	Carnivora	Viverravidae	Viverravus	acutus	1	4.48	2.56	0	0	lm1-2
USGS	8033	D-1436	492	Carnivora	Viverravidae	Viverravus	acutus	1	4.71	3.13	0	0	lm1
USGS	8792	D-1436	492	Carnivora	Viverravidae	Viverravus	acutus	1	5.5	3.29	0	0	lm1
USGS	13793	D-1436	492	Carnivora	Viverravidae	Viverravus	acutus	1	0	0	5.33	2.93	rm1
USGS	13794	D-1436	492	Carnivora	Viverravidae	Viverravus	acutus	1	0	0	0	0	assoc jaw frags
NMNH	509597	D-1436	492	Carnivora	Viverravidae	Viverravus	acutus	1	4.98	2.94	0	0	lp4-m1
NMNH	523997	D-1563	493	Carnivora	Viverravidae	Viverravus	acutus	1	0	0	0	0	lm1-2, broken
USGS	8751	D-1408	494	Carnivora	Viverravidae	Viverravus	acutus	1	0	0	0	0	rp4
NMNH	542035	D-1507	494	Carnivora	Viverravidae	Viverravus	acutus	1					L dent with m1-2
USGS	7303	D-1508	494	Carnivora	Viverravidae	Viverravus	acutus	1	0	0	0	0	lp4
USGS	7715	D-1474	496	Carnivora	Viverravidae	Viverravus	acutus	1	0	0	5.37	3.1	rp4-m2
USGS	7716	D-1474	496	Carnivora	Viverravidae	Viverravus	acutus	1	0	0	0	0	lM1-2
USGS	7717	D-1474	496	Carnivora	Viverravidae	Viverravus	acutus	3	0	0	0	0	misc teeth
USGS	7720	D-1474	496	Carnivora	Viverravidae	Viverravus	acutus	1	0	0	5.16	3.26	rm1
NMNH	521440	D-1474	496	Carnivora	Viverravidae	Viverravus	acutus	1	0	0	0	0	lp4-m1, covered
NMNH	488354	D-1782	496	Carnivora	Viverravidae	Viverravus	acutus	1	0	0	5.02	2.35	rp4-m1
NMNH	509636	D-1782	496	Carnivora	Viverravidae	Viverravus	acutus	1	0	0	4.89	2.88	rp4-m2
NMNH	521582	D-1174	501	Carnivora	Viverravidae	Viverravus	acutus	1	0	0	0	0	l jaw frag
NMNH	521583	D-1174	501	Carnivora	Viverravidae	Viverravus	acutus	1	5.03	2.67	0	0	lp4-m1
USGS	8495	D-1175	501	Carnivora	Viverravidae	Viverravus	acutus	1	0	0	0	0	jaw frag
USGS	25774	D-1430	501	Carnivora	Viverravidae	Viverravus	acutus	1	0	0	0	0	upper and lower jaws squashed together
USGS	7969	D-1435	501	Carnivora	Viverravidae	Viverravus	acutus	1	0	0	0	0	rP4
NMNH	511275	Y-168	501	Carnivora	Viverravidae	Viverravus	acutus	1	4.91	2.88	0	0	lm1-2
USGS	8531	Y-39	501	Carnivora	Viverravidae	Viverravus	acutus	2	0	0	0	0	misc jaw frags
USGS	15993	D-1609	505	Carnivora	Viverravidae	Viverravus	acutus	1	0	0	0	0	lm1 trigonid
USGS	15994	D-1609	505	Carnivora	Viverravidae	Viverravus	acutus	1	0	0	0	0	jaw frag
USGS	15995	D-1609	505	Carnivora	Viverravidae	Viverravus	acutus	1	0	0	0	0	jaw frag
USGS	16030	D-1609	505	Carnivora	Viverravidae	Viverravus	acutus	1	0	0	0	0	lm2
USGS	189	D-1204	~441	Carnivora	Viverravidae	Viverravus	acutus	1	0	0	0	0	lP4-M1
USGS	258	D-1204	~441	Carnivora	Viverravidae	Viverravus	acutus	1	5.6	2.86	0	0	lm1
USGS	267	D-1204	~441	Carnivora	Viverravidae	Viverravus	acutus	1	0	0	0	0	lm2-3, broken
USGS	6161	D-1204	~441	Carnivora	Viverravidae	Viverravus	acutus	1	0	0	0	0	lm1 frag
USGS	6164	D-1204	~441	Carnivora	Viverravidae	Viverravus	acutus	1	5.21	3.03	0	0	lm1-2
USGS	6167	D-1204	~441	Carnivora	Viverravidae	Viverravus	acutus	1	0	0	6.21	3.16	rm1
USGS	8218	D-1204	~441	Carnivora	Viverravidae	Viverravus	acutus	1	0	0	4.91	2.8	rm1-2
USGS	15964	D-1204	~441	Carnivora	Viverravidae	Viverravus	acutus	1	5.42	3.42	0	0	lm1
USGS	15965	D-1204	~441	Carnivora	Viverravidae	Viverravus	acutus	1	4.93	2.62	0	0	lm1
USGS	15970	D-1204	~441	Carnivora	Viverravidae	Viverravus	acutus	1	0	0	0	0	rP4
USGS	20950	D-1393	296	Perissodactyla	Equidae	Arenahippus	aemulor	2	0	0	8.41	5.94	rm1, lm2
USGS	21229	D-1577	311	Perissodactyla	Equidae	Arenahippus	aemulor	1	7.68	5.42	0	0	lm1-2
NMNH	522092	D-1202	324	Perissodactyla	Equidae	Arenahippus	aemulor	1	0	0	0	0	rp4
NMNH	522093	Y-157	332	Perissodactyla	Equidae	Arenahippus	aemulor	1	0	0	0	0	lp4
USGS	24452	D-1288	334	Perissodactyla	Equidae	Arenahippus	aemulor	1	0	0	0	0	rM3
USGS	20921	D-1374	336	Perissodactyla	Equidae	Arenahippus	aemulor	1	0	0	8.07	5.81	rm1-2
USGS	20390	D-1294	342	Perissodactyla	Equidae	Arenahippus	aemulor	3	0	0	0	0	lp4, lm3, M
USGS	5084	D-1384	342	Perissodactyla	Equidae	Arenahippus	aemulor	1	8.29	6.15	0	0	lm1-2, broken
USGS	2663	D-1201	344	Perissodactyla	Equidae	Arenahippus	aemulor	3	8.58	5.55	0	0	lm1, 2 lm2
USGS	5067	D-1386	344	Perissodactyla	Equidae	Arenahippus	aemulor	2	0	0	0	0	lP4-M3, rm2
USGS	20789	D-1386	344	Perissodactyla	Equidae	Arenahippus	aemulor	1	0	0	8.4	5.62	rp3-m2, assoc bits
USGS	20942	D-1386	344	Perissodactyla	Equidae	Arenahippus	aemulor	1	0	0	7.6	5.64	rp3-m3
USGS	21604	Y-131	346	Perissodactyla	Equidae	Arenahippus	aemulor	1	0	0	0	0	2 jaw frags
USGS	21614	Y-131	346	Perissodactyla	Equidae	Arenahippus	aemulor	3	0	0	0	0	2 lM2, lM1-2
NMNH	522363	Y-131	346	Perissodactyla	Equidae	Arenahippus	aemulor	1	0	0	0	0	rm2
USGS	21617	Y-136	359	Perissodactyla	Equidae	Arenahippus	aemulor	1	0	0	8.33	5.66	rp4-m3, assoc frags
USGS	21619	Y-136	359	Perissodactyla	Equidae	Arenahippus	aemulor	1	0	0	8.57	6.06	rp4-m3
NMNH	522365	Y-136	359	Perissodactyla	Equidae	Arenahippus	aemulor	2	0	0	0	0	rp4-m2, broken, lm1-2, broken
USGS	20398	D-1303	360	Perissodactyla	Equidae	Arenahippus	aemulor	1	0	0	0	0	lP4-M3, rP3-M2
USGS	20483	D-1303	360	Perissodactyla	Equidae	Arenahippus	aemulor	1	8.21	5.54	0	0	ldp4-m1
USGS	24442	D-1303	360	Perissodactyla	Equidae	Arenahippus	aemulor	4	0	0	8.84	5.78	rm1, lm2, rm frag, rM
USGS	20333	D-1387	360	Perissodactyla	Equidae	Arenahippus	aemulor	1	7.72	5.32	0	0	rp4, lm1, frags
NMNH	522366	D-1388	360	Perissodactyla	Equidae	Arenahippus	aemulor	1	0	0	0	0	rm3
USGS	20277	D-1340	364	Perissodactyla	Equidae	Arenahippus	aemulor	1	0	0	0	0	lm2
USGS	20448	D-1340	364	Perissodactyla	Equidae	Arenahippus	aemulor	1	0	0	0	0	rdP4-M1
USGS	20487	D-1414	378	Perissodactyla	Equidae	Arenahippus	aemulor	3	0	0	9.11	6.14	rm1, m and M frag
USGS	2846	D-1242	379	Perissodactyla	Equidae	Arenahippus	aemulor	7	7.99	5.28	0	0	lm1, r and lm3, rp4, ldp4, 2 M
NMNH	522372	D-1221	384	Perissodactyla	Equidae	Arenahippus	aemulor	1	0	0	0	0	rm3
USGS	20283	D-1341	384	Perissodactyla	Equidae	Arenahippus	aemulor	4	8.03	5.74	8.52	5.91	rm1, 3 lm1-2, lm2, rM
USGS	20285	D-1341	384	Perissodactyla	Equidae	Arenahippus	aemulor	1	7.75	5.56	0	0	rdp3-4, rm1-2, rp3
USGS	20286	D-1341	384	Perissodactyla	Equidae	Arenahippus	aemulor	1	0	0	0	0	lm1-2, broken
USGS	20297	D-1341	384	Perissodactyla	Equidae	Arenahippus	aemulor	1	0	0	0	0	ldp3-4
NMNH	522368	D-1341	384	Perissodactyla	Equidae	Arenahippus	aemulor	1	0	0	0	0	lm2 fragmented
USGS	20283-a	D-1341	384	Perissodactyla	Equidae	Arenahippus	aemulor	1	8.09	5.38	0	0	lm1-2
USGS	20283-b	D-1341	384	Perissodactyla	Equidae	Arenahippus	aemulor	1	7.8	5.4	0	0	lm1-2
USGS	20290	D-1342	390	Perissodactyla	Equidae	Arenahippus	aemulor	1	0	0	7.79	5.62	rp3-m3
USGS	20294	D-1342	390	Perissodactyla	Equidae	Arenahippus	aemulor	8	0	0	0	0	misc uppers, rm3, rdp3
USGS	20295	D-1342	390	Perissodactyla	Equidae	Arenahippus	aemulor	1	7.27	5.36	0	0	lp4-m3
USGS	20296	D-1342	390	Perissodactyla	Equidae	Arenahippus	aemulor	1	0	0	8.13	5.24	rp4-m1
USGS	61	D-1218	392	Perissodactyla	Equidae	Arenahippus	aemulor	1	0	0	0	0	rm2-3
USGS	2381	D-1219	392	Perissodactyla	Equidae	Arenahippus	aemulor	1	0	0	0	0	lp3-m1, lm3, rp4-m2, lM1-3, broken
NMNH	522371	D-1556	397	Perissodactyla	Equidae	Arenahippus	aemulor	1	0	0	0	0	lm3
NMNH	522373	D-1952	400	Perissodactyla	Equidae	Arenahippus	aemulor	1	0	0	0	0	lm3 frag
NMNH	uncatalogued	D-1952	400	Perissodactyla	Equidae	Arenahippus	aemulor	3	8.67	5.67			lp4-m1, rM2-3, rm frag
NMNH	522084	D-1951	402	Perissodactyla	Equidae	Arenahippus	aemulor	1	0	0	0	0	lm2-3
NMNH	522085	D-1951	402	Perissodactyla	Equidae	Arenahippus	aemulor	1	8.31	5.69	0	0	lp4-m3
NMNH	522104	D-1951	402	Perissodactyla	Equidae	Arenahippus	aemulor	1	7.81	5.62	0	0	lm1-2
NMNH	522105	D-1951	402	Perissodactyla	Equidae	Arenahippus	aemulor	1	0	0	8.64	6.16	rp4-m1
NMNH	522106	D-1951	402	Perissodactyla	Equidae	Arenahippus	aemulor	1	0	0	0	0	rm2-3
USGS	523265a	D-1951	402	Perissodactyla	Equidae	Arenahippus	aemulor	2	0	0	0	0	rm2, rM2-3
USGS	21084	D-1538	405	Perissodactyla	Equidae	Arenahippus	aemulor	10	8.47	5.8	0	0	ldp3-m2, r and lm2, misc teeth
USGS	24822	D-1538	405	Perissodactyla	Equidae	Arenahippus	aemulor	1	0	0	7.72	5.48	rp3-m3
NMNH	522107	D-1538	405	Perissodactyla	Equidae	Arenahippus	aemulor	1	0	0	7.75	5.53	rp4-m2, lm2
USGS	21288	D-1559	405	Perissodactyla	Equidae	Arenahippus	aemulor	3	7.92	5.29	0	0	r and lm1 (broken), m3 frag
NMNH	523311	Y-461	405	Perissodactyla	Equidae	Arenahippus	aemulor	1	0	0	0	0	lm2
NMNH	523497	Y-461	405	Perissodactyla	Equidae	Arenahippus	aemulor	1	8.5	5.16	0	0	lp3-m1
USGS	24302-duplicate	D-1350	409	Perissodactyla	Equidae	Arenahippus	aemulor	1	0	0	7.7	5.63	rp3-m1
USGS	19799	D-1454	409	Perissodactyla	Equidae	Arenahippus	aemulor	3	0	0	0	0	rm2-3, lm2, lm3
USGS	19802	D-1454	409	Perissodactyla	Equidae	Arenahippus	aemulor	2	0	0	7.57	5.49	rp3-m1, lm2-3
USGS	19803	D-1454	409	Perissodactyla	Equidae	Arenahippus	aemulor	1	8.06	5.61	0	0	lp4-m1
USGS	19808	D-1454	409	Perissodactyla	Equidae	Arenahippus	aemulor	5	0	0	7.32	5.66	rm1-2, misc teeth
USGS	19810	D-1454	409	Perissodactyla	Equidae	Arenahippus	aemulor	2	0	0	7.67	5.53	rp3-4, rp4-m1
USGS	19811	D-1454	409	Perissodactyla	Equidae	Arenahippus	aemulor	1	0	0	0	0	ldp4, lm2 erupting
USGS	19817	D-1454	409	Perissodactyla	Equidae	Arenahippus	aemulor	1	0	0	7.85	5.54	rm1-3, assoc
USGS	19821	D-1454	409	Perissodactyla	Equidae	Arenahippus	aemulor	4	0	0	0	0	rm2-3, rm3, 2 lm2
USGS	19825	D-1454	409	Perissodactyla	Equidae	Arenahippus	aemulor	1	0	0	8.06	5.51	rp3-m1
USGS	19933	D-1454	409	Perissodactyla	Equidae	Arenahippus	aemulor	3	7.38	5.4	7.71	5.58	rm1-3, lp4-m1, lm3
USGS	19936	D-1454	409	Perissodactyla	Equidae	Arenahippus	aemulor	1	7.51	5.66	8.01	5.37	rm1, lp4-m3, jaw frags
NMNH	522279	D-1454	409	Perissodactyla	Equidae	Arenahippus	aemulor	1	0	0	8.03	5.42	rm2-3, jaw frag
NMNH	522280	D-1454	409	Perissodactyla	Equidae	Arenahippus	aemulor	1	8.49	5.89	0	0	lm1
NMNH	523043	D-1454	409	Perissodactyla	Equidae	Arenahippus	aemulor	2	0	0	0	0	r and lm2-3
NMNH	523044	D-1454	409	Perissodactyla	Equidae	Arenahippus	aemulor	1	0	0	0	0	rP2-M3, lP2-4
NMNH	523045	D-1454	409	Perissodactyla	Equidae	Arenahippus	aemulor	1	0	0	7.45	5.65	rm1-2
NMNH	523046	D-1454	409	Perissodactyla	Equidae	Arenahippus	aemulor	1	0	0	0	0	rm1-2, covered
NMNH	523047	D-1454	409	Perissodactyla	Equidae	Arenahippus	aemulor	18	0	0	0	0	misc teeth
USGS	19808-a	D-1454	409	Perissodactyla	Equidae	Arenahippus	aemulor	1	0	0	7.91	5.41	rm1
USGS	19878	D-1460	409	Perissodactyla	Equidae	Arenahippus	aemulor	4	7.75	5.05	0	0	lm1-2, misc m
USGS	19893	D-1460	409	Perissodactyla	Equidae	Arenahippus	aemulor	5	8.13	5.55	7.71	5.15	rp4-m2, lm1, misc m
USGS	19895	D-1460	409	Perissodactyla	Equidae	Arenahippus	aemulor	1	0	0	0	0	lm2-3
USGS	19896	D-1460	409	Perissodactyla	Equidae	Arenahippus	aemulor	1	8.31	5.5	0	0	lm1
USGS	19946	D-1460	409	Perissodactyla	Equidae	Arenahippus	aemulor	1	7.73	5.28	0	0	lp3, lm1-2, rP4
USGS	20093	D-1460	409	Perissodactyla	Equidae	Arenahippus	aemulor	8	8.09	5.55	0	0	lm1-2, 2rm3, rm2 frag, lP3-m3, rP4-M3
USGS	20225	D-1306	410	Perissodactyla	Equidae	Arenahippus	aemulor	8	7.64	5.36	0	0	misc teeth, lm1, lm2
USGS	21296	D-1549	410	Perissodactyla	Equidae	Arenahippus	aemulor	1	0	0	0	0	rP4-M3, lM1-2
USGS	21501	D-1658	410	Perissodactyla	Equidae	Arenahippus	aemulor	1	0	0	7.63	5.43	rp4-m2
NMNH	523048	D-1658	410	Perissodactyla	Equidae	Arenahippus	aemulor	2	0	0	7.66	5.58	rp4-m2, lm2
NMNH	523049	D-1658	410	Perissodactyla	Equidae	Arenahippus	aemulor	1	0	0	0	0	rm2
NMNH	523050	D-1804	411	Perissodactyla	Equidae	Arenahippus	aemulor	2	0	0	0	0	lm2-3, rm3
NMNH	522281	D-1217	412	Perissodactyla	Equidae	Arenahippus	aemulor	1	0	0	0	0	lm3
USGS	25510	D-1411	412	Perissodactyla	Equidae	Arenahippus	aemulor	1	0	0	0	0	lm2-3
NMNH	523312	D-1779	412	Perissodactyla	Equidae	Arenahippus	aemulor	1	0	0	0	0	lm2
USGS	24961	D-1774	413	Perissodactyla	Equidae	Arenahippus	aemulor	3	0	0	0	0	rm2, lM3, rm2-3
USGS	24964	D-1774	413	Perissodactyla	Equidae	Arenahippus	aemulor	1	0	0	0	0	rm2-3
USGS	25618	D-1774	413	Perissodactyla	Equidae	Arenahippus	aemulor	1	0	0	0	0	assoc jaw frags
USGS	25620	D-1774	413	Perissodactyla	Equidae	Arenahippus	aemulor	1	7.66	5.9	0	0	lp4-m2
NMNH	523051	D-1528	414	Perissodactyla	Equidae	Arenahippus	aemulor	1	0	0	0	0	rp4, lp3-4
NMNH	523313	D-1528	414	Perissodactyla	Equidae	Arenahippus	aemulor	1	0	0	0	0	m frags
USGS	21098	D-1541	414	Perissodactyla	Equidae	Arenahippus	aemulor	1	0	0	0	0	m frags
USGS	21109	D-1541	414	Perissodactyla	Equidae	Arenahippus	aemulor	1	0	0	0	0	lp3
NMNH	523583	D-1541	414	Perissodactyla	Equidae	Arenahippus	aemulor	3	0	0	7.83	5.26	rm1, rm2-3, rp3-4
USGS	22277	D-1680	414	Perissodactyla	Equidae	Arenahippus	aemulor	12	0	0	0	0	r and lm2, misc M and m
NMNH	523314	D-1762	414	Perissodactyla	Equidae	Arenahippus	aemulor	4	0	0	0	0	lm2-3, rm2, rm3, lM frag
NMNH	523519	D-1747	415	Perissodactyla	Equidae	Arenahippus	aemulor	1	0	0	0	0	assoc jaw frags
USGS	24238	D-1554	416	Perissodactyla	Equidae	Arenahippus	aemulor	1	0	0	0	0	rm3
NMNH	523521	D-1821	416	Perissodactyla	Equidae	Arenahippus	aemulor	4	0	0	0	0	rm1-2, broken, lm2, misc jaw frags
NMNH	523052	WW-12	417	Perissodactyla	Equidae	Arenahippus	aemulor	2	0	0	0	0	r and lM
USGS	20127	D-1529	420	Perissodactyla	Equidae	Arenahippus	aemulor	1	0	0	0	0	jaw frags, assoc
NMNH	523315	D-1946	422	Perissodactyla	Equidae	Arenahippus	aemulor	1	0	0	0	0	rm frag
USGS	20245	D-1324	424	Perissodactyla	Equidae	Arenahippus	aemulor	2	0	0	0	0	lm2, rM
USGS	5663	D-1326	425	Perissodactyla	Equidae	Arenahippus	aemulor	1	0	0	8.13	5.99	rp3-m3
USGS	5664	D-1326	425	Perissodactyla	Equidae	Arenahippus	aemulor	1	7.76	5.47	7.61	5.67	rp4-m2, lp4-m1
USGS	5673	D-1326	425	Perissodactyla	Equidae	Arenahippus	aemulor	2	0	0	8.19	5.79	rm1, misc m frags
USGS	5690	D-1326	425	Perissodactyla	Equidae	Arenahippus	aemulor	1	0	0	8.02	5.26	rm1-2
USGS	5695	D-1326	425	Perissodactyla	Equidae	Arenahippus	aemulor	1	0	0	7.9	5.68	rp3-m1
USGS	5699	D-1326	425	Perissodactyla	Equidae	Arenahippus	aemulor	1	0	0	0	0	ldp3-4
USGS	5706	D-1326	425	Perissodactyla	Equidae	Arenahippus	aemulor	1	0	0	0	0	rP2-3
USGS	5719	D-1326	425	Perissodactyla	Equidae	Arenahippus	aemulor	2	0	0	7.58	5.42	rm1-2, rm2-3
USGS	19669	D-1326	425	Perissodactyla	Equidae	Arenahippus	aemulor	6	8.1	5.38	8.42	5.45	r and lm1, misc teeth
USGS	19669-a	D-1326	425	Perissodactyla	Equidae	Arenahippus	aemulor	1	8.42	5.68	0	0	lm1
NMNH	523229	D-1822	426	Perissodactyla	Equidae	Arenahippus	aemulor	1	0	0	0	0	rm2-3
USGS	20310	D-1349	430	Perissodactyla	Equidae	Arenahippus	aemulor	4	0	0	0	0	rp3-4, lm3, jaw frags
USGS	5148	D-1376	430	Perissodactyla	Equidae	Arenahippus	aemulor	1	0	0	0	0	M frags
USGS	20932	D-1380	430	Perissodactyla	Equidae	Arenahippus	aemulor	2	0	0	0	0	rp3-4, rp4
USGS	20937	D-1380	430	Perissodactyla	Equidae	Arenahippus	aemulor	1	0	0	8.16	5.28	rdp4-m2
USGS	20938	D-1380	430	Perissodactyla	Equidae	Arenahippus	aemulor	2	0	0	0	0	rm2, lM
USGS	20326	D-1381	430	Perissodactyla	Equidae	Arenahippus	aemulor	1	0	0	7.79	5.39	rm1-2
USGS	20300	D-1347	431	Perissodactyla	Equidae	Arenahippus	aemulor	1	0	0	8.02	5.63	rm1-2, assoc frags
USGS	20576	D-1570	435	Perissodactyla	Equidae	Arenahippus	aemulor	8	8	5.49	7.39	5.12	r and lm1, rp4, misc bits and postcr
USGS	24967	D-1742	435	Perissodactyla	Equidae	Arenahippus	aemulor	1	0	0	7.73	5.32	rp4-m2
NMNH	523317	D-1377	436	Perissodactyla	Equidae	Arenahippus	aemulor	2	8.48	5.77	8.42	5.63	r and lm1
USGS	20592	D-1206	438	Perissodactyla	Equidae	Arenahippus	aemulor	2	0	0	0	0	2 rm3
USGS	20593	D-1206	438	Perissodactyla	Equidae	Arenahippus	aemulor	1	7.78	5.83	0	0	lp4-m2
USGS	24818	D-1206	438	Perissodactyla	Equidae	Arenahippus	aemulor	3	0	0	0	0	r and lp4, m frag
USGS	24820	D-1206	438	Perissodactyla	Equidae	Arenahippus	aemulor	1	7.89	5.39	0	0	lm1-2, assoc frags
NMNH	522116	D-1206	438	Perissodactyla	Equidae	Arenahippus	aemulor	2	0	0	0	0	2 rp4
NMNH	523054	D-1206	438	Perissodactyla	Equidae	Arenahippus	aemulor	6	0	0	0	0	misc teeth
NMNH	522427	D-1320	438	Perissodactyla	Equidae	Arenahippus	aemulor	1	0	0	8.68	5.77	rm1-3, lm2, lM1-3, postcrania
NMNH	522460	D-1320	438	Perissodactyla	Equidae	Arenahippus	aemulor	1	0	0	0	0	lM2-3
NMNH	522705	D-1320	438	Perissodactyla	Equidae	Arenahippus	aemulor	2	7.69	5.63	0	0	lp3-m3, rdp4
NMNH	523276	D-1320	438	Perissodactyla	Equidae	Arenahippus	aemulor	1	0	0	7.55	5.68	rp3-m3, lM1-2, assoc frags
NMNH	523318	D-1322	438	Perissodactyla	Equidae	Arenahippus	aemulor	2	0	0	0	0	rp4-m1, broken, rm2-3
USGS	20432	D-1325	438	Perissodactyla	Equidae	Arenahippus	aemulor	1	8.61	5.77	0	0	ldp4-m1
USGS	21555	D-1693	438	Perissodactyla	Equidae	Arenahippus	aemulor	1	0	0	0	0	rm frag
USGS	19836	D-1452	440	Perissodactyla	Equidae	Arenahippus	aemulor	2	0	0	0	0	rm2-3, rm3
USGS	19850	D-1452	440	Perissodactyla	Equidae	Arenahippus	aemulor	1	8.39	5.24	0	0	lm1-2, rm2, assoc frag
USGS	19855	D-1452	440	Perissodactyla	Equidae	Arenahippus	aemulor	3	0	0	0	0	rp4-m1, broken, rM, lp4
USGS	24252	D-1452	440	Perissodactyla	Equidae	Arenahippus	aemulor	2	8.1	5.55	0	0	lm1, lm2
USGS	21528	D-1684	440	Perissodactyla	Equidae	Arenahippus	aemulor	1	7.9	5.79	0	0	lp3-m2
USGS	22469	D-1684	440	Perissodactyla	Equidae	Arenahippus	aemulor	1	0	0	0	0	rdp4-m1, covered
USGS	5124	D-1310	442	Perissodactyla	Equidae	Arenahippus	aemulor	1	0	0	0	0	rM
USGS	20186	D-1310	442	Perissodactyla	Equidae	Arenahippus	aemulor	1	0	0	0	0	rM1-3
NMNH	523319	D-1310	442	Perissodactyla	Equidae	Arenahippus	aemulor	7	0	0	0	0	misc teeth
USGS	522289a	D-1310	442	Perissodactyla	Equidae	Arenahippus	aemulor	1	8.29	5.78	0	0	lp4-m2
USGS	523231a	D-1310	442	Perissodactyla	Equidae	Arenahippus	aemulor	3	0	0	0	0	r and lm3, misc upper frag
USGS	5095	D-1311	442	Perissodactyla	Equidae	Arenahippus	aemulor	1	0	0	0	0	ldp3-4
NMNH	523320	D-1407	442	Perissodactyla	Equidae	Arenahippus	aemulor	2	0	0	0	0	rp3-4, rm3
USGS	21455	D-1588	442	Perissodactyla	Equidae	Arenahippus	aemulor	1	8.36	5.47	0	0	lm1-2
NMNH	523056	D-1588	442	Perissodactyla	Equidae	Arenahippus	aemulor	1	0	0	0	0	lm3
USGS	22106	D-1660	442	Perissodactyla	Equidae	Arenahippus	aemulor	1	0	0	0	0	palate in 3 pieces, lM3
USGS	22426	D-1660	442	Perissodactyla	Equidae	Arenahippus	aemulor	1	0	0	0	0	rp2
USGS	2344	D-1204	~441	Perissodactyla	Equidae	Arenahippus	aemulor	2	8.87	6.27	0	0	lp4-m1, rm3
USGS	6190	D-1204	~441	Perissodactyla	Equidae	Arenahippus	aemulor	3	0	0	0	0	rm2, r and lM
USGS	6191	D-1204	~441	Perissodactyla	Equidae	Arenahippus	aemulor	1	0	0	7.84	5.55	rm1-2
USGS	6192	D-1204	~441	Perissodactyla	Equidae	Arenahippus	aemulor	1	0	0	0	0	rm3 frag
USGS	6195	D-1204	~441	Perissodactyla	Equidae	Arenahippus	aemulor	1	0	0	0	0	rm3
USGS	19426	D-1204	~441	Perissodactyla	Equidae	Arenahippus	aemulor	1	0	0	0	0	rp2-4, rm2
USGS	20589	D-1204	~441	Perissodactyla	Equidae	Arenahippus	aemulor	1	0	0	0	0	lP3-M3
USGS	24303	D-1204	~441	Perissodactyla	Equidae	Arenahippus	aemulor	1	0	0	0	0	lp3-m3, broken, rp3-4, rm2-3, frags
USGS	24364	D-1204	~441	Perissodactyla	Equidae	Arenahippus	aemulor	1	0	0	0	0	rm3
NMNH	523278	D-1204	~441	Perissodactyla	Equidae	Arenahippus	aemulor	1	0	0	0	0	lm3
USGS	3881	Y-131	346	Primates	Omomyidae	Pseudotetonius	ambiguus	1	0	0	2.13	1.84	rp4-m3
USGS	3882	Y-131	346	Primates	Omomyidae	Pseudotetonius	ambiguus	1	2.07	1.85	0	0	lp4-m2
USGS	3883	Y-131	346	Primates	Omomyidae	Pseudotetonius	ambiguus	1	0	0	2.26	2.06	rp4-m3
USGS	3884	Y-131	346	Primates	Omomyidae	Pseudotetonius	ambiguus	1	0	0	0	0	rP3-4
NMNH	495378	D-1334	360	Primates	Omomyidae	Pseudotetonius	ambiguus	1	0	0	0	0	lP4-M3
USGS	6752	D-1387	360	Primates	Omomyidae	Pseudotetonius	ambiguus	1	2.26	2.06	0	0	lm1-3
USGS	8842	Y-132/D-1332	360	Primates	Omomyidae	Pseudotetonius	ambiguus	1	0	0	0	0	rP4
USGS	9144	Y-132/D-1332	360	Primates	Omomyidae	Pseudotetonius	ambiguus	1	0	0	2.27	2.1	rp4-m3
USGS	3860	D-1340	364	Primates	Omomyidae	Pseudotetonius	ambiguus	1	0	0	0	0	rP3-4
USGS	6633	D-1453	378	Primates	Omomyidae	Pseudotetonius	ambiguus	1	2.59	2.16	0	0	lp4-m3
USGS	21729	D-1779	412	Primates	Omomyidae	Pseudotetonius	ambiguus	1	0	0	2.29	2.06	rp3-m2, assoc frag
USGS	3867	D-1287	346	Primates	Omomyidae	Pseudotetonius	ambiguus*	1	2.09	2.03	0	0	lp4-m2
USGS	3795	D-1328	292	Primates	Microsyopidae	Microsyops	angustidens	1	0	0	0	0	rm2-3
USGS	18586	D-1328	292	Primates	Microsyopidae	Microsyops	angustidens	2	0	0	0	0	rp4, rm2
USGS	9931	D-1577	311	Primates	Microsyopidae	Microsyops	angustidens	1	3.24	2.31	0	0	lp4-m1
USGS	9932	D-1577	311	Primates	Microsyopidae	Microsyops	angustidens	1	0	0	3.39	2.28	rm1-2
USGS	7334	D-1500	322	Primates	Microsyopidae	Microsyops	angustidens	1	0	0	3.42	2.63	rp4-m2
NMNH	542069	Y-157 low	322	Primates	Microsyopidae	Microsyops	angustidens	1					R dent with m2-3
NMNH	542096	Y-157 low	322	Primates	Microsyopidae	Microsyops	angustidens	1	3.75	2.93			L m1
NMNH	542100	Y-157 low	322	Primates	Microsyopidae	Microsyops	angustidens	2					R dentary with p4-m2 (covered), L dentary with m2
USGS	21665	D-1775	329	Primates	Microsyopidae	Microsyops	angustidens	1	0	0	3.75	2.59	rp4-m2
USGS	2142	Y-157	332	Primates	Microsyopidae	Microsyops	angustidens	1	3.67	2.57	0	0	lm1, lM1
USGS	7365	Y-157	332	Primates	Microsyopidae	Microsyops	angustidens	1	3.78	2.74	0	0	lp4-m1
USGS	7366	Y-157	332	Primates	Microsyopidae	Microsyops	angustidens	6	3.73	2.7	0	0	lm1, misc teeth
USGS	9683	Y-157	332	Primates	Microsyopidae	Microsyops	angustidens	1	3.47	2.62	0	0	lp4-m1, assoc frags
NMNH	521485	Y-157	332	Primates	Microsyopidae	Microsyops	angustidens	1	0	0	0	0	lp3-4
USGS	3794	Y-459	332	Primates	Microsyopidae	Microsyops	angustidens	1	0	0	0	0	rp4
USGS	3804	D-1373	337	Primates	Microsyopidae	Microsyops	angustidens	1	0	0	0	0	lp4
USGS	13658	D-1373	337	Primates	Microsyopidae	Microsyops	angustidens	1	0	0	0	0	rM1
USGS	3768	D-1335	341	Primates	Microsyopidae	Microsyops	angustidens	4	0	0	0	0	misc jaw frags
USGS	3769	D-1335	341	Primates	Microsyopidae	Microsyops	angustidens	1	0	0	0	0	lM2-3
USGS	3770	D-1335	341	Primates	Microsyopidae	Microsyops	angustidens	1	0	0	0	0	rp3-4
USGS	3826	D-1335	341	Primates	Microsyopidae	Microsyops	angustidens	1	3.32	2.73	0	0	lp4-m3
USGS	4691	D-1289	342	Primates	Microsyopidae	Microsyops	angustidens	1	0	0	0	0	rM2-3
USGS	1979	D-1201	344	Primates	Microsyopidae	Microsyops	angustidens	4	3.68	2.84	0	0	lm1-2, misc bits
USGS	7004	D-1201	344	Primates	Microsyopidae	Microsyops	angustidens	1	0	0	3.78	2.68	rm1
USGS	17798	D-1201	344	Primates	Microsyopidae	Microsyops	angustidens	1	0	0	0	0	lm2
USGS	17800	D-1201	344	Primates	Microsyopidae	Microsyops	angustidens	1	0	0	0	0	l I
USGS	17801	D-1201	344	Primates	Microsyopidae	Microsyops	angustidens	1	0	0	3.32	2.73	rm1-2
USGS	17804	D-1201	344	Primates	Microsyopidae	Microsyops	angustidens	1	3.93	2.64	0	0	lp4-m1
USGS	9744	D-1493	344	Primates	Microsyopidae	Microsyops	angustidens	2	0	0	0	0	misc teeth
USGS	13684	D-1493	344	Primates	Microsyopidae	Microsyops	angustidens	1	0	0	3.69	3.01	rp4-m1
USGS	13685	D-1493	344	Primates	Microsyopidae	Microsyops	angustidens	2	0	0	3.76	3.07	rm1, lm3
USGS	25861	D-1811	344	Primates	Microsyopidae	Microsyops	angustidens	1	0	0	3.35	2.67	rm1
USGS	3712	D-1287	346	Primates	Microsyopidae	Microsyops	angustidens	1	0	0	0	0	rP4-M3
USGS	3713	D-1287	346	Primates	Microsyopidae	Microsyops	angustidens	1	3.65	2.64	0	0	lm1
USGS	3714	D-1287	346	Primates	Microsyopidae	Microsyops	angustidens	1	3.47	2.86	0	0	lp4-m1
USGS	3715	D-1287	346	Primates	Microsyopidae	Microsyops	angustidens	1	0	0	0	0	rp4
USGS	9075	D-1287	346	Primates	Microsyopidae	Microsyops	angustidens	1	3.4	2.68	0	0	lm1-2
USGS	3818	Y-131	346	Primates	Microsyopidae	Microsyops	angustidens	1	0	0	3.62	2.64	rm1-2
USGS	3819	Y-131	346	Primates	Microsyopidae	Microsyops	angustidens	1	0	0	0	0	lM2-3
USGS	335	D-1243	348	Primates	Microsyopidae	Microsyops	angustidens	1	0	0	3.83	2.67	rm1-3
USGS	338	D-1243	348	Primates	Microsyopidae	Microsyops	angustidens	1	0	0	0	0	rm3
USGS	3792	D-1299	352	Primates	Microsyopidae	Microsyops	angustidens	1	0	0	3.76	2.72	rm1-2
USGS	6027	D-1415	354	Primates	Microsyopidae	Microsyops	angustidens	1	0	0	3.69	2.69	rm1-2
USGS	4570	D-1391	356	Primates	Microsyopidae	Microsyops	angustidens	1	0	0	0	0	rm1-2, squashed
NMNH	521451	Y-136	359	Primates	Microsyopidae	Microsyops	angustidens	1	0	0	3.59	2.49	rp3-m1
USGS	10453	D-1303	360	Primates	Microsyopidae	Microsyops	angustidens	1	0	0	0	0	lM3
NMNH	495394	D-1334	360	Primates	Microsyopidae	Microsyops	angustidens	1	3.94	2.7	0	0	lm1-2
USGS	7039	D-1387	360	Primates	Microsyopidae	Microsyops	angustidens	1	0	0	0	0	rm2
USGS	5935	D-1420	360	Primates	Microsyopidae	Microsyops	angustidens	1	0	0	0	0	rm2-3
USGS	8839	Y-132/D-1332	360	Primates	Microsyopidae	Microsyops	angustidens	1	3.22	2.24	0	0	lp4-m2
USGS	9170	Y-132/D-1332	360	Primates	Microsyopidae	Microsyops	angustidens	1	0	0	4.02	2.71	rp4-m2
USGS	12989	D-1340	364	Primates	Microsyopidae	Microsyops	angustidens	1	3.33	2.36	3.48	2.27	rp4-m1, lm1-2
USGS	7382	D-1422	370	Primates	Microsyopidae	Microsyops	angustidens	1	0	0	3.46	2.58	rp4-m1
USGS	8014	D-1242	379	Primates	Microsyopidae	Microsyops	angustidens	1	3.54	2.79	0	0	lp4-m1
NMNH	527638	Y-219	397	Primates	Microsyopidae	Microsyops	angustidens	1					R mand w/ m2-3 (broken)
USGS	10031	D-1551	400	Primates	Microsyopidae	Microsyops	angustidens	1	0	0	0	0	lM1
USGS	23887	Y-461	405	Primates	Microsyopidae	Microsyops	angustidens	1	0	0	3.34	2.89	rp4-m1
USGS	23888	Y-461	405	Primates	Microsyopidae	Microsyops	angustidens	1	0	0	0	0	lP4
[truncated: 12,137 more rows]

## Sheet: S2
Table S2. Faunal list for the Fifteenmile Creek (FC) sample used in the analysis of faunal response to ETM2 and H2
Order	Family	Genus	Species	FC level of first appearance	FC level of last appearance	Number of Specimens
Apatotheria	Apatemyidae	Apatemys	chardini	<290	>510	16
Apatotheria	Apatemyidae	Apatemys	rodens	409	485	16
Apatotheria	Apatemyidae	Labidolemur	kayi	<290	>510	4
Artiodactyla	Diacodexidae	Bunophorus	etsagicus	385	>510	37
Artiodactyla	Diacodexidae	Bunophorus	grangeri	392	>510	75
Artiodactyla	Diacodexidae	Bunophorus	lysitensis	482	>510	21
Artiodactyla	Diacodexidae	Diacodexis	gracilis	292	>510	137
Artiodactyla	Diacodexidae	Diacodexis	metsiacus	<290	409	492
Artiodactyla	Diacodexidae	Diacodexis	robustus	<290	>510	86
Artiodactyla	Diacodexidae	Diacodexis	secans	409	>510	1711
Artiodactyla	Diacodexidae	Hexacodus	sp.	438	>510	31
Carnivora	Miacidae	Miacis	exiguus	<290	412	5
Carnivora	Miacidae	Miacis	petilus	311	>510	82
Carnivora	Miacidae	Uintacyon	new sp. 1	407	>510	17
Carnivora	Miacidae	Uintacyon	rudis	<290	441	3
Carnivora	Miacidae	Vassacyon	promicrodon	<290	481	33
Carnivora	Miacidae	Vulpavus	australis*	392	>510	26
Carnivora	Miacidae	Vulpavus	canavus*	400	>510	114
Carnivora	Viverravidae	Didymictis	curtidens	482	>510	2
Carnivora	Viverravidae	Didymictis	lysitensis	409	>510	368
Carnivora	Viverravidae	Didymictis	protenus	<290	410	152
Carnivora	Viverravidae	Viverravus	acutus	<290	>510	198
Carnivora	Viverravidae	Viverravus	politus	<290	410	1
Carnivora	Viverravidae	Viverravus	rosei	<290	414	1
Cimolesta	Cimolestidae	Didelphodus	absarokae	<290	>510	93
Condylarthra	Apheliscidae	Apheliscus	insidiosus	<290	412	31
Condylarthra	Apheliscidae	Apheliscus	sp.	423	>510	26
Condylarthra	Apheliscidae	Haplomylus	speirianus	<290	381	91
Condylarthra	Arctocyonidae	Anacodon	ursidens	417	>510	91
Condylarthra	Arctocyonidae	Chriacus	gallinae*	381	>510	55
Condylarthra	Arctocyonidae	Thryptacodon	antiguus*	<290	360	7
Condylarthra	Arctocyonidae	Thryptacodon	loisi	409	>510	12
Condylarthra	Hyopsodontidae	Hyopsodus	latidens	392	>510	4725
Condylarthra	Hyopsodontidae	Hyopsodus	lysitensis	481	>510	104
Condylarthra	Hyopsodontidae	Hyopsodus	minor	378	505	4148
Condylarthra	Hyopsodontidae	Hyopsodus	powellianus	409	>510	109
Condylarthra	Hyopsodontidae	Hyopsodus	sp. 1	485	>510	188
Condylarthra	Hyopsodontidae	Hyopsodus	sp. 2	402	501	1296
Condylarthra	Hyopsodontidae	Hyopsodus	wortmani	<290	379	340
Condylarthra	Mesonychidae	Dissacus	serior	463	>510	2
Condylarthra	Mesonychidae	Dissacus	sp.	<290	417	2
Condylarthra	Mesonychidae	Hapalodectes	leptognathus	496	>510	2
Condylarthra	Mesonychidae	Pachyaena	ossifraga	<290	412	9
Condylarthra	Phenacodontidae	Copecion	brachypternus	<290	>510	121
Condylarthra	Phenacodontidae	Ectocion	osbornianus*	<290	379	25
Condylarthra	Phenacodontidae	Phenacodus	intermedius	<290	400	11
Condylarthra	Phenacodontidae	Phenacodus	sp.	409	>510	33
Condylarthra	Phenacodontidae	Phenacodus	trilobatus	<290	>510	209
Condylarthra	Phenacodontidae	Phenacodus	vortmani	<290	>510	518
Creodonta	Hyaenodontidae	Arfia	opisthotoma*	<290	354	1
Creodonta	Hyaenodontidae	Galecyon	mordax	<290	352	4
Creodonta	Hyaenodontidae	Galecyon	sp.*	405	>510	12
Creodonta	Hyaenodontidae	Prolimnocyon	antiquus	442	>510	45
Creodonta	Hyaenodontidae	Prolimnocyon	atavus	<290	446	39
Creodonta	Hyaenodontidae	Prolimnocyon	sp.	409	448	9
Creodonta	Hyaenodontidae	Prototomus	martis	<290	380	30
Creodonta	Hyaenodontidae	Prototomus	secundarius	392	>510	139
Creodonta	Hyaenodontidae	Prototomus	sp.	<290	384	12
Creodonta	Hyaenodontidae	Tritemnodon	gigantea	381	458	58
Creodonta	Hyaenodontidae	Tritemnodon	hians	463	500	16
Creodonta	Oxyaenidae	Ambloctonus	sinosus	390	>510	2
Creodonta	Oxyaenidae	Oxyaena	forcipata	409	>510	114
Creodonta	Oxyaenidae	Oxyaena	intermedia	<290	438	87
Creodonta	Oxyaenidae	Oxyaena	sp.	466	>510	2
Creodonta	Oxyaenidae	Palaeonictis	occidentalis	<290	501	4
Dermoptera	Plagiomenidae	Plagiomene	multicuspis	<290	392	27
Eulipotyphla	Amphilemuridae	Macrocranion	nitens	<290	>510	1
Leptictida	Leptictidae	Palaeictops	bicuspis	394	>510	48
Leptictida	Leptictidae	Prodiacodon	tauricinerei	<290	>510	37
Marsupialia	Peradectidae	Mimoperadectes	labrus	<290	291	1
Marsupialia	Peradectidae	Peradectes	protinnominatus	<290	344	1
Marsupialia	Peradectidae	Peratherium	comstocki	<290	>510	2
Marsupialia	Peradectidae	Peratherium	sp.	426	>510	2
Pantolesta	Pantolestidae	Palaeosinopa	incerta	483	501	3
Pantolesta	Pantolestidae	Palaeosinopa	sp.	341	>510	5
Pantolesta	Pantolestidae	Palaeosinopa	veterrima*	332	>510	38
Perissodactyla	Equidae	Arenahippus	aemulor	<290	442	338
Perissodactyla	Equidae	Arenahippus	pernix	<290	409	1078
Perissodactyla	Equidae	Eohippus	angustidens	409	486	5382
Perissodactyla	Equidae	Minippus	index	377	>510	333
Perissodactyla	Equidae	Protorohippus	montanum	481	>510	2133
Perissodactyla	Equidae	Protorohippus	venticolum	441	>510	265
Perissodactyla	Equidae	Xenicohippus	craspedotum	<290	>510	175
Perissodactyla	Equidae	Xenicohippus	grangeri	409	483	52
Perissodactyla	Helaletidae	Heptodon	calciculus*	430	>510	174
Perissodactyla	Isectolophidae	Cardiolophus	radinskyi	<290	409	52
Perissodactyla	Isectolophidae	Homogalax	protapirinus	<290	505	132
Perissodactyla	Isectolophidae	Homogalax	sp.	390	>510	436
Perissodactyla	Isectolophidae	Systemodon	tapirinus	377	>510	221
Primates	Microsyopidae	Microsyops	angustidens	<290	420	130
Primates	Microsyopidae	Microsyops	latidens	423	>510	597
Primates	Microsyopidae	Niptomomys	doreenae	<290	505	6
Primates	Notharctidae	Cantius	abditus	384	>510	1677
Primates	Notharctidae	Cantius	new sp.	370	>510	359
Primates	Notharctidae	Cantius	trigonodus	<290	392	229
Primates	Notharctidae	Copelemur	feretutus	381	>510	359
Primates	Omomyidae	Absarokius	abbotti	442	>510	92
Primates	Omomyidae	Absarokius	metoecus	425	>510	146
Primates	Omomyidae	Absarokius	sp.	501	>510	1
Primates	Omomyidae	Anemorhysis	pattersoni*	382	481	7
Primates	Omomyidae	Pseudotetonius	ambiguus*	346	412	12
Primates	Omomyidae	Steinius	annectens	496	>510	1
Primates	Omomyidae	Steinius	vespertinus	414	463	8
Primates	Omomyidae	T. matthewi-P. ambiguus	intermediates	<290	344	42
Primates	Omomyidae	Teilhardina	demissa	428	470	2
Primates	Omomyidae	Tetonius	matthewi	<290	336	6
Primates	Paromomyidae	Phenacolemur	citatus	352	>510	97
Primates	Paromomyidae	Phenacolemur	fortior	<290	360	18
Primates	Paromomyidae	Phenacolemur	willwoodensis	441	>510	3
Rodentia	Paramyidae	Acritoparamys	atwateri	<290	>510	60
Rodentia	Paramyidae	Franimys	sp.	470	>510	12
Rodentia	Paramyidae	Leptotomus	loomisi	<290	501	21
Rodentia	Paramyidae	Lophiparamys	sp.	501	>510	4
Rodentia	Paramyidae	Microparamys	scopaiodon	<290	409	4
Rodentia	Paramyidae	Microparamys	sp.	491	>510	3
Rodentia	Paramyidae	Notoparamys	costilloi	455	501	35
Rodentia	Paramyidae	Paramys	copei	<290	>510	89
Rodentia	Paramyidae	Paramys	major	470	>510	2
Rodentia	Paramyidae	Paramys	taurus	<290	501	136
Rodentia	Sciuravidae	Knightomys	depressus	<290	501	14
Tillodontia	Esthonychidae	Esthonyx	acutidens	<290	>510	240
Tillodontia	Esthonychidae	Esthonyx	bisulcatus	492	>510	21
Tillodontia	Esthonychidae	Esthonyx	sp.	435	>510	153
Tillodontia	Esthonychidae	Esthonyx	spatularius	<290	442	274
						32246
*Specimen(s) known in the Elk Creek part of the Bighorn Basin from outside the FC stratigraphic range reported here, including Vulpavus australis at 354 m, V. canavus at 361 m, Chriacus gallinae at 345 m, Thryptacodon antiguus at 370 m, Ectocion osbornianus at 390 m, Arfia opisthotoma at 400 m, Galecyon sp. at 390 m, Palaeosinopa veterrima at 310 m, Heptodon calciculus at 357 m, Anemorhysis patte…

## Sheet: S3
Table S3. Binning series constructed for the Fifteenmile Creek (FC) sample used in the analysis of faunal response to ETM2 and H2
5-meter bins	Number of specimens	Number of localities	Number of species		6-meter bins	Number of specimens	Number of localities	Number of species		7-meter bins	Number of specimens	Number of localities	Number of species		8-meter bins	Number of specimens	Number of localities	Number of species
289-293	54	7	20		292-297	56	5	19		288-294	54	7	20		291-298	59	6	21
294-298	12	2	9		298-303	0	0	0		295-301	12	2	9		299-306	0	0	0
299-303	0	0	0		304-309	0	0	0		302-308	0	0	0		307-314	113	1	19
304-308	0	0	0		310-315	113	1	19		309-315	113	1	19		315-322	39	2	14
309-313	113	1	19		316-321	0	0	0		316-322	39	2	14		323-330	95	4	19
314-318	0	0	0		322-327	71	5	22		323-329	95	4	19		331-338	639	10	31
319-323	39	2	14		328-333	447	3	27		330-336	543	8	30		339-346	723	15	41
324-328	32	3	11		334-339	255	8	26		337-343	316	9	32		347-354	97	5	18
329-333	447	3	27		340-345	496	13	38		344-350	529	9	35		355-362	324	14	32
334-338	255	8	26		346-351	253	3	27		351-357	103	9	20		363-370	168	8	26
339-343	220	7	29		352-357	103	9	20		358-364	385	11	36		371-378	123	7	21
344-348	529	9	35		358-363	292	9	32		365-371	75	6	13		379-386	343	13	41
349-353	40	2	11		364-369	98	3	20		372-378	123	7	21		387-394	380	15	41
354-358	63	7	17		370-375	71	6	13		379-385	343	13	41		395-402	487	13	38
359-363	292	9	32		376-381	343	12	37		386-392	322	12	38		403-410	2651	23	62
364-368	98	3	20		382-387	122	7	26		393-399	178	8	28		411-418	937	21	56
369-373	70	5	13		388-393	323	13	38		400-406	727	15	47		419-426	1481	18	50
374-378	123	7	21		394-399	177	7	28		407-413	2490	22	62		427-434	486	17	40
379-383	228	8	31		400-405	721	14	46		414-420	944	21	54		435-442	3701	41	64
384-388	115	5	26		406-411	2316	18	59		421-427	1275	12	45		443-450	971	12	44
389-393	323	13	38		412-417	868	18	55		428-434	486	17	40		451-460	587	14	41
394-398	172	6	27		418-423	533	12	43		435-441	2780	33	59		461-471	6250	28	63
399-403	372	9	34		424-429	1099	11	42		442-448	1152	16	51		472-482	4664	35	64
404-408	401	9	39		430-435	453	19	44		449-455	1201	15	50		483-493	3998	47	68
409-413	2449	20	61		436-441	2712	28	57		456-465	3734	20	58		494-504	2746	32	71
414-418	738	15	51		442-447	1072	13	47		466-475	2922	20	57		505-515	170	6	28
419-423	483	10	41		448-453	950	12	46		476-485	5345	38	67
424-428	1099	11	42		454-461	467	10	35		486-495	3724	40	63
429-433	377	13	39		462-469	4204	21	59		496-505	2216	29	61
434-438	865	28	47		470-477	2362	19	55
439-443	2852	15	59		478-485	5299	34	67
444-448	223	7	31		486-493	3037	35	63
449-453	870	9	44		494-501	2738	31	71
454-460	457	9	35		502-509	178	7	28
461-467	4132	20	59
468-474	2376	15	54
475-481	2640	22	58
482-488	2882	23	60
489-495	3569	35	61
496-502	2051	26	71
503-509	178	7	28

## Sheet: S4
Table S4. Statistical tests of the significance of changes in the binned, averaged parameter distributions, comparing the interval prior to the interval of faunal events B-1 and B-2
Kolmogorov-Smirnov two-sample tests comparing the binned, averaged parameters from 328-369 m to 395-461 m (excluding Biohorizon B)
Alpha richness					Beta richness					Gamma richness					Rate of first appearances					Rate of last appearances					Turnover					Inverse dominance					Inclusive abundance					Evenness
Maximum Differences for Pairs of Groups					Maximum Differences for Pairs of Groups					Maximum Differences for Pairs of Groups					Maximum Differences for Pairs of Groups					Maximum Differences for Pairs of Groups					Maximum Differences for Pairs of Groups					Maximum Differences for Pairs of Groups					Maximum Differences for Pairs of Groups					Maximum Differences for Pairs of Groups
	1	2				1	2				1	2				1	2				1	2				1	2				1	2				1	2				1	2
1	0				1	0				1	0				1	0				1	0				1	0				1	0				1	0				1	0
2	0.19	0			2	0.375	0			2	0.292	0			2	0.883	0			2	0.481	0			2	0.417	0			2	0.507	0			2	0.8	0			2	0.593	0
Two-Sided Probabilities					Two-Sided Probabilities					Two-Sided Probabilities					Two-Sided Probabilities					Two-Sided Probabilities					Two-Sided Probabilities					Two-Sided Probabilities					Two-Sided Probabilities					Two-Sided Probabilities
	1	2				1	2				1	2				1	2				1	2				1	2				1	2				1	2				1	2
1	1				1	1				1	1				1	1				1	1				1	1				1	1				1	1				1	1
2	0.308	1			2	0.002	1			2	0.027	1			2	0	1			2	0	1			2	0	1			2	0	1			2	0	1			2	0	1
Mann-Kendal time series tests of trends in the averaged parameters from 328-369 m
Alpha richness					Beta richness					Gamma richness					Rate of first appearances					Rate of last appearances					Turnover					Inverse dominance					Inclusive abundance					Evenness
H0: No Trend vs H1: Upward Trend					H0: No Trend vs H1: Downward Trend					H0: No Trend vs H1: Downward Trend					H0: No Trend vs H1: Upward Trend					H0: No Trend vs H1: Upward Trend					H0: No Trend vs H1: Upward Trend					H0: No Trend vs H1: Downward Trend					H0: No Trend vs H1: Upward Trend					H0: No Trend vs H1: Downward Trend
Statistic	ASE	Z	p-value		Statistic	ASE	Z	p-value		Statistic	ASE	Z	p-value		Statistic	ASE	Z	p-value		Statistic	ASE	Z	p-value		Statistic	ASE	Z	p-value		Statistic	ASE	Z	p-value		Statistic	ASE	Z	p-value		Statistic	ASE	Z	p-value
85	90.117	0.932	0.176		-310	84.408	-3.661	0		-239	84.627	-2.812	0.002		385	91.73	4.186	0		404	91.353	4.411	0		488	91.982	5.295	0		-213	91.94	-2.306	0.011		8	91.866	0.076	0.47		-161	91.987	-1.739	0.041
					Slope Estimator					Slope Estimator					Slope Estimator					Slope Estimator					Slope Estimator					Slope Estimator										Slope Estimator
					Slope Estimate	95% Upper Limit				Slope Estimate	95% Upper Limit				Slope Estimate	95% Lower Limit				Slope Estimate	95% Lower Limit				Slope Estimate	95% Lower Limit				Slope Estimate	95% Upper Limit									Slope Estimate	95% Upper Limit
					-0.12	-0.074				-0.091	-0.06				0	0				0.001	0				0.001	0.001				-0.001	0									-0.001	0
Mann-Kendal time series tests of trends in the averaged parameters from 370-461 m
Alpha richness					Beta richness					Gamma richness					Rate of first appearances					Rate of last appearances					Turnover					Inverse dominance					Inclusive abundance					Evenness
H0: No Trend vs H1: Upward Trend					H0: No Trend vs H1: Upward Trend					H0: No Trend vs H1: Upward Trend					H0: No Trend vs H1: Downward Trend					H0: No Trend vs H1: Downward Trend					H0: No Trend vs H1: Downward Trend					H0: No Trend vs H1: Downward Trend					H0: No Trend vs H1: Downward Trend					H0: No Trend vs H1: Downward Trend
Statistic	ASE	Z	p-value		Statistic	ASE	Z	p-value		Statistic	ASE	Z	p-value		Statistic	ASE	Z	p-value		Statistic	ASE	Z	p-value		Statistic	ASE	Z	p-value		Statistic	ASE	Z	p-value		Statistic	ASE	Z	p-value		Statistic	ASE	Z	p-value
-119	262.242	-0.45	0.326		1550	264.77	5.85	0		867	266.241	3.253	0.001		-1384	267.652	-5.167	0		-1656	267.77	-6.181	0		-1881	267.79	-7.02	0		-78	267.774	-0.288	0.387		-605	267.804	-2.255	0.012		-689	267.826	-2.569	0.005
					Slope Estimator					Slope Estimator					Slope Estimator					Slope Estimator					Slope Estimator										Slope Estimator					Slope Estimator
					Slope Estimate	95% Lower Limit				Slope Estimate	95% Lower Limit				Slope Estimate	95% Upper Limit				Slope Estimate	95% Upper Limit				Slope Estimate	95% Upper Limit									Slope Estimate	95% Upper Limit				Slope Estimate	95% Upper Limit
					0.046	0.039				0.042	0.019				0	0				-0.001	0				-0.001	-0.001									0	0				0	0
