# Supplementary material for: Mammal faunal change in the zone of the Paleogene hyperthermals ETM2 and H2
Source: Copernicus journal article supplement (doi:10.5194/cp-11-1223-2015), 2015-09-24
Supplement: Supplementary file [file cp-11-1223-2015-supplement-title-page.pdf › cp-11-1223-2015-supplement-title-page.pdf]

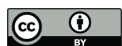

## *Supplement of*

# **Mammal faunal change in the zone of the Paleogene hyperthermals ETM2 and H2**

**A. E. Chew**

*Correspondence to:* A. E. Chew (achew@westernu.edu)

- cp-11-1223-2015-supplement-title-page.pdf
- Supplementary tables.xlsx

The copyright of individual parts of the supplement might differ from the CC-BY 3.0 licence.
